# Supplementary material for: Mechanisms Underlying the Exquisite Sensitivity of Candida albicans to Combinatorial Cationic and Oxidative Stress That Enhances the Potent Fungicidal Activity of Phagocytes
Source: PubMed Central journal article supplement (PMC4161263; doi:10.1128/mbio.01334-14), 2014-07-15
Supplement: mbo004141905sf02.pdf [file mbo004141905sf02.pdf]

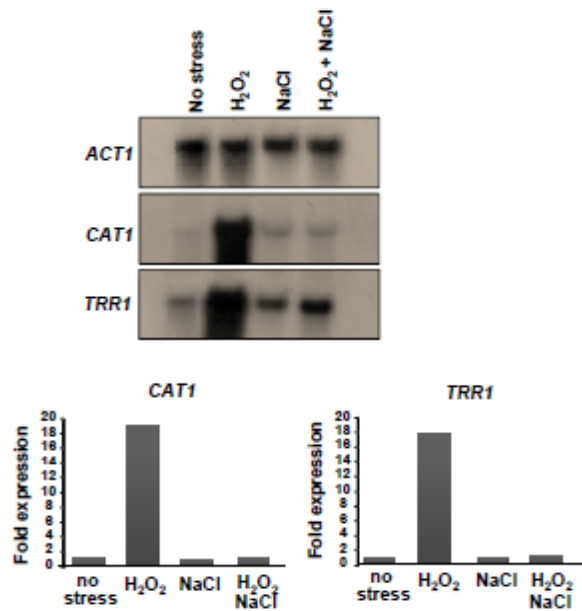

**Figure S2. Cap1 dependent gene expression is inhibited by combinatorial cationic plus oxidative stress.**

Northern analysis of RNA isolated from wild type *C. albicans* cells (JC747) grown in YPDT pH7.4 at 30°C and exposed to stress for 10 min: no stress; 5 mM H<sub>2</sub>O<sub>2</sub>; 1 M NaCl; or 5 mM H<sub>2</sub>O<sub>2</sub> plus 1 M NaCl. Northern blots were probed for the Cap1-dependent genes *CAT1* and *TRR1*, as well as the *ACT1* mRNA internal loading control. The levels of the *CAT1* and *TRR1* RNAs were quantified relative to the *ACT1* control.
