# Supplementary material for: Mechanisms Underlying the Exquisite Sensitivity of Candida albicans to Combinatorial Cationic and Oxidative Stress That Enhances the Potent Fungicidal Activity of Phagocytes
Source: PubMed Central journal article supplement (PMC4161263; doi:10.1128/mbio.01334-14), 2014-07-15
Supplement: mbo004141905sf03.pdf [file mbo004141905sf03.pdf]

**A**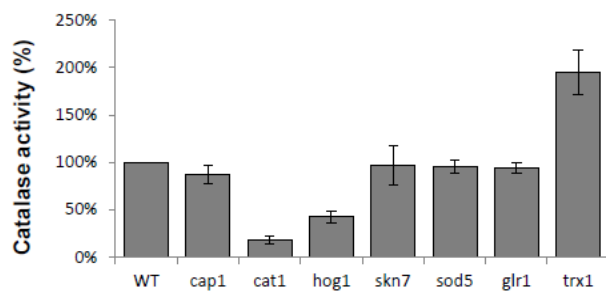**B**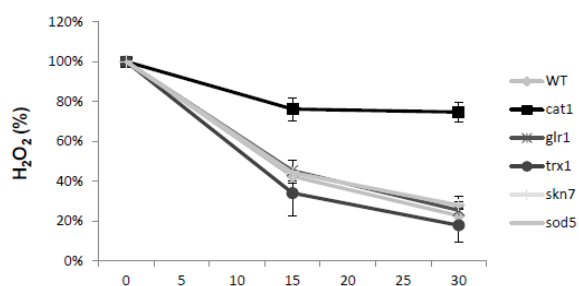

**Figure S3. Basal catalase activities and rate of H<sub>2</sub>O<sub>2</sub> detoxification in *C. albicans* cells.**

(A) The basal catalase activity was measured in wild type (CA372) (n=6), *cap1* (n=3), *cat1* (n=3), *hog1* (n=6), *skn7* (n=3), *sod5* (n=3), *glr1* (n=3) and *trx1* (n=6) strains (Table S1) before exposure to stress (mean  $\pm$  SD).

(B) The rate of detoxification of extracellular H<sub>2</sub>O<sub>2</sub> by *C. albicans* cells is not affected by disrupting the thioredoxin or glutaredoxin systems. The rate of extracellular detoxification of H<sub>2</sub>O<sub>2</sub> was measured in wild type (CA372) (n=5), *cat1* (n=4), *glr1* (n=4), *trx1* (n=4), *skn7* (n=4) and *sod5* (n=3), strains (Table S1) (mean  $\pm$  SD).
