# Supplementary material for: Mechanisms Underlying the Exquisite Sensitivity of Candida albicans to Combinatorial Cationic and Oxidative Stress That Enhances the Potent Fungicidal Activity of Phagocytes
Source: PubMed Central journal article supplement (PMC4161263; doi:10.1128/mbio.01334-14), 2014-07-15
Supplement: mbo004141905sf04.pdf [file mbo004141905sf04.pdf]

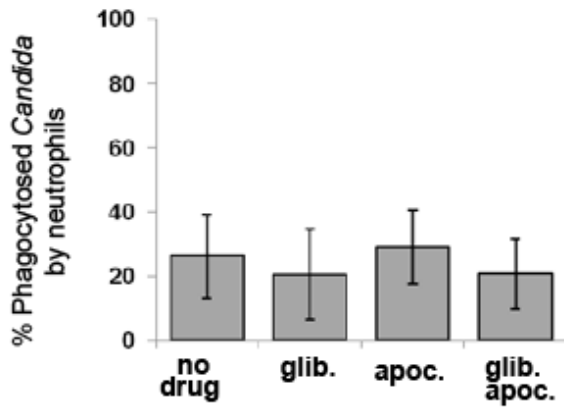

**Figure S4. The phagocytosis of *C. albicans* cells by human neutrophils is not significantly affected by their treatment with 200  $\mu$ M glibenclamide or apocynin.**

*C. albicans* cells were labeled with FITC, co-incubated with blood-derived human neutrophils for 60 min, and the rate of phagocytosis determined by FACS analysis (mean  $\pm$  SD, n=3).
