# Supplementary material for: Mechanisms Underlying the Exquisite Sensitivity of Candida albicans to Combinatorial Cationic and Oxidative Stress That Enhances the Potent Fungicidal Activity of Phagocytes
Source: PubMed Central journal article supplement (PMC4161263; doi:10.1128/mbio.01334-14), 2014-07-15
Supplement: mbo004141905st1.pdf [file mbo004141905st1.pdf]

Table S1

Table S1: Strains used in this study

| Strain                                  | Genotype                                                                                                                                      | Source          |
|-----------------------------------------|-----------------------------------------------------------------------------------------------------------------------------------------------|-----------------|
| <b><i>Candida albicans</i></b>          |                                                                                                                                               |                 |
| SC5314                                  | Clinical isolate                                                                                                                              | [2]             |
| CAI4                                    | <i>ura3::λimm434/ura3::λimm434</i> (SC5314 lineage)                                                                                           | [3]             |
| RM1000                                  | <i>ura3::λimm434/ura3::λimm434, his1::hisG/his1::hisG</i>                                                                                     | [4]             |
| BWP17                                   | <i>ura3::λimm434/ura3::λimm434, his1::hisG/his1::hisG, arg4::hisG/arg4::hisG</i>                                                              | [4]             |
| CA372                                   | <i>ura3::λimm434/ura3::λimm434, RPS1-Clp10(URA3)</i>                                                                                          | [5]             |
| CA674                                   | <i>ura3::λimm434/ura3::λimm434, his1::hisG/his1::hisG, RPS1-Clp20(URA3,HIS1)</i>                                                              | [6]             |
| CA1206                                  | <i>ura3::λimm434/ura3::λimm434, his1::hisG/his1::hisG, arg4::hisG/arg4::hisG, RPS1-Clp30(URA3,HIS1,ARG4)</i>                                  | [6]             |
| ML258                                   | <i>ura3::λimm434/ura3::λimm434, RPS1-pACT1-FLAG-GFP</i>                                                                                       | [7]             |
| SN148                                   | <i>arg4/arg4, leu2/leu2, his1/his1, ura3::λimm434/ura3::λimm434, iro1::λimm434/iro1::λimm434</i>                                              | [8]             |
| JC45                                    | <i>ura3::λimm434/ura3::λimm434, his1::hisG/his1::hisG, hog1::loxP-ura3-loxP/hog1::loxP-HIS1-loxP</i>                                          | [9]             |
| JC63                                    | <i>ura3::λimm434/ura3::λimm434, his1hisG/his1hisG, HOG1-YFP-URA3/HOG1-YFP-HIS1</i>                                                            | [10]            |
| JC677                                   | <i>trx1::loxP-ARG4-loxP/trx1::loxP- HIS1-loxP, RPS1-Clp10 (URA3)</i>                                                                          | [11]            |
| JC747                                   | <i>arg4/arg4, leu2/leu2, his1/his1, ura3::λimm434/ura3::λimm434, iro1::λimm434/iro1::λimm434, RPS1-Clp30(URA3 HIS1 ARG4)</i>                  | [11]            |
| JC842                                   | <i>ura3::λimm434/ura3::λimm434, his1::hisG/his1::hisG, arg4::hisG/arg4::hisG, cap1::loxP-ARG4-loxP/cap1::loxP-HIS1-loxP, RPS1-Clp10(URA3)</i> | This study      |
| JC948                                   | <i>arg4/arg4, leu2/leu2, his1/his1, ura3::λimm434/ura3::λimm434, iro1::λimm434/iro1::λimm434, CAP1-MH-URA3</i>                                | [11]            |
| JC1060                                  | <i>arg4/arg4, leu2/leu2, his1/his1, ura3::λimm434/ura3::λimm434, iro1::λimm434/iro1::λimm434, CAP1-GFP-URA3</i>                               | [11]            |
| CA1864                                  | <i>ura3::λimm434/ura3::λimm434, his1::hisG/his1::hisG, cta1::loxP-URA3-loxP/cta1::HIS1</i>                                                    | This study      |
| ACT1-CAT1                               | <i>ura3::λimm434/ura3::λimm434, his1::hisG/his1::hisG, CTA1/URA3-prACT1-CTA1</i>                                                              | This study      |
| <i>cta4Δ</i>                            | <i>SN152, cta4Δ ::CmLEU2/cta4Δ::CdARG4, arg4Δ::dpl200/arg4Δ::dpl200, leu2Δ::dpl200/leu2Δ::dpl200</i>                                          | [12]            |
| <i>skn7Δ</i>                            | <i>ura3::λimm434/ura3::λimm434, skn7::hisG/skn7::hisG-URA3-hisG</i>                                                                           | [13]            |
| <i>sod5Δ</i>                            | <i>arg4/arg4, leu2/leu2, his1/his1, URA3/ura3::λimm434, IRO1/iro1::λimm434, sod5::cmLEU2/sod5::CdHIS1</i>                                     | [14]            |
| <i>glr1Δ</i>                            | <i>glr1/glr1, ura3::λimm434/ura3::URA3, his1::hisG/his1::hisG, arg4::hisG/arg4::hisG</i>                                                      | From Ben Distel |
| <b><i>Candida glabrata</i></b>          |                                                                                                                                               |                 |
| CBS138                                  | Clinical isolate (ATCC 2001)                                                                                                                  | [15]            |
| <b><i>Saccharomyces cerevisiae</i></b>  |                                                                                                                                               |                 |
| BY4741                                  | <i>MATa, his3, leu2, met15, ura3</i>                                                                                                          | Euroscarf       |
| <b><i>Schizosaccharomyces pombe</i></b> |                                                                                                                                               |                 |
| 972                                     | Environmental isolate                                                                                                                         | [16]            |

## Supplemental References

1. **Chou, T. C. and Talalay, P.** 1984. Quantitative analysis of dose-effect relationships: the combined effects of multiple drugs or enzyme inhibitors. *Adv. Enzyme. Regul.* **22**: 27-55.
2. **Gillum, A. M., Tsay, E. Y. H. and Kirsch, D. R.** 1984. Isolation of the *Candida albicans* gene for orotidine-5'-phosphate decarboxylase by complementation of *S. cerevisiae ura3* and *Escherichia coli PyrF* mutations. *Molec. General Genet.* **198**: 179-182 (1984).
3. **Fonzi, W. A. and Irwin, M. Y.** 1993. Isogenic Strain Construction and Gene-Mapping in *Candida albicans*. *Genetics* **134**: 717-728.
4. **Wilson, R. B., Davis, D. and Mitchell, A. P.** 1999. Rapid hypothesis testing with *Candida albicans* through gene disruption with short homology regions. *J. Bacteriol.* **181**: 1868-1874.
5. **Murad, A. M. A., Lee, P. R., Broadbent, I. D., Barelle, C. J. and Brown, A. J. P.** 2000. Clp10, an efficient and convenient integrating vector for *Candida albicans*. *Yeast* **16**, 325-327.
6. **Dennison, P. M. J., Ramsdale, M., Manson, C. L. and Brown, A. J. P.** 2005. Gene disruption in *Candida albicans* using a synthetic, codon-optimised Cre-loxP system. *Fungal Genet. Biol.* **42**: 737-748.
7. **Noble, S. M. and Johnson, A. D.** 2005. Strains and strategies for large-scale gene deletion studies of the diploid human fungal pathogen *Candida albicans*. *Eukaryotic Cell* **4**: 298-309.
8. **Chirand, W., Zhou, H., Lynn, J.J., Vega, L.A., Myers, H., Yates III, J.R., Lorenz, M.C. and Gustin, M.C.** 2008. CTA4 transcription factor mediates induction of nitrosative stress response in *Candida albicans*. *Eukaryotic Cell.* **7**: 268-278.
9. **Singh, P., Chauhan, N., Ghosh, A., Dixon, F., and Calderone, R.** 2004. SKN7 of *Candida albicans*: Mutant construction and phenotype analysis. *Infect. Immun.* **72**, 2390-2394 (2004).
10. **Frohner, I. E., Bourgeois, C., Yatsyk, K., Majer, O. and Kuchler, K.** 2009. *Candida albicans* cell surface superoxide dismutases degrade host-derived reactive oxygen species to escape innate immune surveillance. *Molec. Microbiol.* **71**:, 240-252.
11. **Dujon, B. et al.** 2004. Genome evolution in yeasts. *Nature* **430**: 35-44.
12. **Wood, V. et al.** 2002. The genome sequence of *Schizosaccharomyces pombe*. *Nature* **415**: 871-880.
