# Supplementary material for: Mechanisms Underlying the Exquisite Sensitivity of Candida albicans to Combinatorial Cationic and Oxidative Stress That Enhances the Potent Fungicidal Activity of Phagocytes
Source: PubMed Central journal article supplement (PMC4161263; doi:10.1128/mbio.01334-14), 2014-07-15
Supplement: mbo004141905st2.pdf [file mbo004141905st2.pdf]

**Table S2. Microarray dataset**

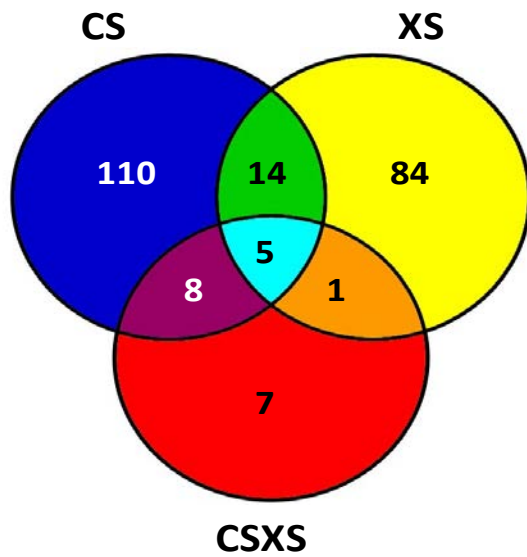

Numbers of UP-regulated *C. albicans* genes following CS (1M NaCl), XS (5 mM H<sub>2</sub>O<sub>2</sub>), or CSXS (1M NaCl + 5 mM H<sub>2</sub>O<sub>2</sub>) for 10 min. Genes upregulated >2.5 fold (p<0.05) are colourcoded according to this Venn diagram in the gene lists

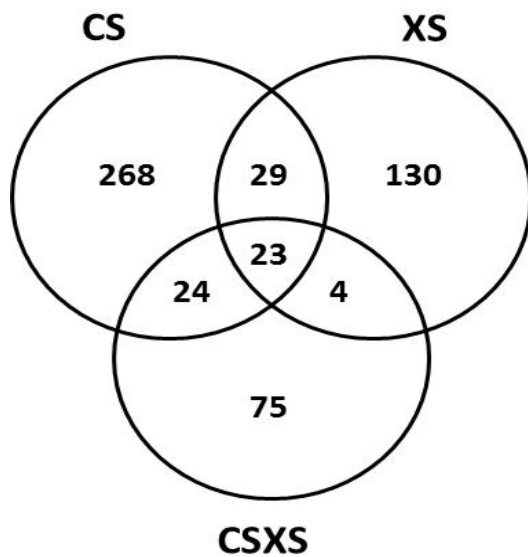

Numbers of DOWN-regulated *C. albicans* genes following CS (1M NaCl), XS (5 mM H<sub>2</sub>O<sub>2</sub>), or CSXS (1M NaCl + 5 mM H<sub>2</sub>O<sub>2</sub>) for 10 min. Genes upregulated >2.5 fold (p<0.05)

**Gene Regulation (microarray dataset)**

| orf 19        | Gene  | Fold change |       |       |
|---------------|-------|-------------|-------|-------|
|               |       | CS          | XS    | CSXS  |
| orf19.5239    |       | 6.17        | 4.98  | 2.83  |
| orf19.7003    |       | 37.69       | 0.93  | 14.09 |
| orf19.6957.3  |       | 22.07       | 1.47  | 7.27  |
| orf19.4155.12 |       | 19.70       | 1.42  | 6.71  |
| orf19.6724    | FUM12 | 6.32        | 1.75  | 4.50  |
| orf19.5806    | ALD5  | 7.64        | 0.68  | 3.74  |
| orf19.3549    | CDC21 | 2.70        | 1.84  | 2.68  |
| orf19.7598    |       | 6.09        | 12.52 | 3.33  |
| orf19.2896    | SOU1  | 5.64        | 3.96  | 2.74  |
| orf19.2959.1  |       | 3.55        | 3.28  | 2.31  |
| orf19.5640    | PEX5  | 4.05        | 2.69  | 2.20  |
| orf19.1078    | HBR2  | 5.21        | 6.20  | 2.10  |

|              |       |       |       |       |
|--------------|-------|-------|-------|-------|
| orf19.3483   |       | 6.92  | 3.68  | 2.08  |
| orf19.1375   | LEU42 | 4.02  | 10.44 | 2.01  |
| orf19.2244   |       | 3.73  | 5.21  | 1.92  |
| orf19.359    |       | 2.81  | 7.31  | 1.90  |
| orf19.449    |       | 2.81  | 4.02  | 1.83  |
| orf19.3340   | SOD2  | 2.69  | 3.93  | 1.75  |
| orf19.2067   |       | 2.72  | 7.86  | 1.38  |
| orf19.691    | GPD2  | 3.17  | 2.63  | 1.28  |
| orf19.6484   |       | 77.57 | 8.35  | 6.78  |
| orf19.2756   |       | 5.60  | 2.78  | 3.33  |
| orf19.4370   |       | 8.40  | 15.99 | 2.77  |
| orf19.1743   | ACS1  | 3.99  | 0.89  | 2.71  |
| orf19.3218   |       | 3.16  | 2.62  | 3.29  |
| orf19.346    |       | 5.27  | 1.48  | 2.73  |
| orf19.6528   |       | 2.29  | 2.32  | 3.13  |
| orf19.6630   |       | 2.79  | 1.40  | 3.35  |
| orf19.6990   |       | 3.31  | 7.50  | 12.83 |
| orf19.7284   | ASR2  | 6.71  | 3.51  | 4.09  |
| orf19.6548   | ISU1  | 5.67  | 26.65 | 6.88  |
| orf19.5521   | ISA1  | 18.74 | 20.21 | 7.65  |
| orf19.7296   |       | 36.48 | 6.71  | 26.10 |
| orf19.2531   | CSP37 | 3.51  | 3.34  | 3.38  |
| orf19.5291   |       | 3.43  | 3.17  | 2.84  |
| orf19.3355   | ISN1  | 2.25  | 3.54  | 2.98  |
| orf19.1125   |       | 1.11  | 61.36 | 1.12  |
| orf19.3131   | OYE32 | 1.49  | 56.42 | 1.47  |
| orf19.6229   | CAT1  | 4.08  | 38.02 | 1.79  |
| orf19.4290   | TRR1  | 1.31  | 18.57 | 1.26  |
| orf19.5517   |       | 2.04  | 13.39 | 1.20  |
| orf19.1162   |       | 1.54  | 13.04 | 1.15  |
| orf19.2825   |       | 1.74  | 12.79 | 1.50  |
| orf19.238    | CCP1  | 2.41  | 11.72 | 1.88  |
| orf19.1623   | CAP1  | 1.94  | 11.53 | 1.13  |
| orf19.2396   | IFR2  | 3.07  | 10.93 | 2.77  |
| orf19.861    |       | 7.85  | 10.87 | 8.67  |
| orf19.3395   |       | 0.45  | 10.70 | 0.94  |
| orf19.6059   | TTR1  | 1.32  | 10.33 | 1.49  |
| orf19.4147   | GLR1  | 1.46  | 9.65  | 1.15  |
| orf19.2461   | PRN4  | 1.67  | 8.96  | 1.05  |
| orf19.1861   |       | 1.51  | 7.56  | 1.35  |
| orf19.7611   | TRX1  | 1.44  | 7.08  | 1.58  |
| orf19.251    |       | 1.28  | 7.00  | 1.12  |
| orf19.4737   | TPO3  | 0.62  | 6.53  | 0.81  |
| orf19.4449   |       | 2.11  | 6.47  | 1.31  |
| orf19.86     |       | 1.66  | 5.79  | 1.13  |
| orf19.7085   |       | 3.27  | 5.72  | 1.99  |
| orf19.3139   |       | 1.45  | 5.63  | 0.84  |
| orf19.847    | YIM1  | 0.84  | 5.35  | 0.64  |
| orf19.1756   | GPD1  | 0.30  | 5.27  | 0.50  |
| orf19.473    | TPO4  | 0.45  | 5.22  | 0.65  |
| orf19.4907   |       | 0.93  | 5.08  | 0.94  |
| orf19.6509   |       | 1.55  | 4.85  | 1.60  |
| orf19.2073   |       | 1.22  | 4.83  | 0.94  |
| orf19.7398.1 | TSA1B | 1.26  | 4.67  | 1.24  |
| orf19.6811   |       | 1.88  | 4.61  | 1.61  |
| orf19.2337   | ALP1  | 1.05  | 4.30  | 0.83  |
| orf19.7417   | TSA1  | 1.21  | 4.29  | 1.20  |
| orf19.411    |       | 0.80  | 4.27  | 0.84  |
| orf19.2006.1 |       | 2.30  | 4.24  | 1.24  |
| orf19.1189   |       | 0.62  | 4.23  | 0.53  |
| orf19.5286   | YCP4  | 1.52  | 4.15  | 1.48  |
| orf19.388    | CAF16 | 2.39  | 4.09  | 1.45  |
| orf19.4754   | ZWF1  | 1.38  | 3.97  | 0.87  |
| orf19.4784   | CRP1  | 0.77  | 3.97  | 1.09  |
| orf19.2028   | MXR1  | 2.49  | 3.92  | 1.73  |
| orf19.3130   |       | 0.87  | 3.85  | 0.87  |
| orf19.4309   | GRP2  | 1.84  | 3.80  | 1.50  |

|            |       |       |      |      |
|------------|-------|-------|------|------|
| orf19.6608 |       | 1.78  | 3.78 | 2.27 |
| orf19.6527 |       | 2.43  | 3.69 | 0.86 |
| orf19.3026 | MAS1  | 2.05  | 3.67 | 1.28 |
| orf19.4371 | TAL1  | 2.40  | 3.50 | 1.53 |
| orf19.3644 |       | 2.24  | 3.44 | 1.15 |
| orf19.2737 |       | 7.22  | 3.43 | 2.55 |
| orf19.7558 | YTA6  | 1.75  | 3.39 | 1.34 |
| orf19.1290 | XKS1  | 2.20  | 3.30 | 1.42 |
| orf19.6063 | UBP6  | 2.23  | 3.17 | 1.78 |
| orf19.7570 |       | 1.89  | 3.16 | 1.35 |
| orf19.4430 |       | 2.34  | 3.01 | 1.78 |
| orf19.1153 | GAD1  | 2.06  | 2.98 | 1.29 |
| orf19.3448 |       | 1.05  | 2.97 | 1.36 |
| orf19.749  |       | 1.07  | 2.97 | 1.30 |
| orf19.868  | ADAEC | 2.76  | 2.93 | 2.27 |
| orf19.6463 |       | 1.29  | 2.92 | 0.98 |
| orf19.451  | SOK1  | 0.93  | 2.92 | 0.74 |
| orf19.7583 |       | 0.83  | 2.91 | 0.98 |
| orf19.3054 | RPN3  | 2.06  | 2.86 | 1.73 |
| orf19.3195 | HIP1  | 1.74  | 2.82 | 0.94 |
| orf19.79   |       | 0.53  | 2.82 | 0.50 |
| orf19.99   | HAL21 | 1.48  | 2.78 | 1.67 |
| orf19.2618 | MET2  | 1.93  | 2.77 | 1.09 |
| orf19.7438 | UBA1  | 2.20  | 2.77 | 1.82 |
| orf19.4127 |       | 2.33  | 2.77 | 1.90 |
| orf19.6770 |       | 0.53  | 2.75 | 0.89 |
| orf19.226  |       | 1.27  | 2.73 | 1.39 |
| orf19.4246 |       | 2.70  | 2.71 | 1.88 |
| orf19.3392 | DOG1  | 2.11  | 2.70 | 1.97 |
| orf19.7531 |       | 1.29  | 2.69 | 1.14 |
| orf19.1816 | ALS3  | 0.55  | 2.62 | 0.41 |
| orf19.5193 |       | 1.47  | 2.62 | 1.95 |
| orf19.4871 | ERO1  | 1.10  | 2.61 | 1.00 |
| orf19.5378 |       | 2.03  | 2.58 | 2.04 |
| orf19.909  | STP4  | 1.29  | 2.58 | 1.33 |
| orf19.3099 | TRP4  | 1.79  | 2.56 | 1.40 |
| orf19.884  |       | 3.41  | 2.52 | 1.51 |
| orf19.2333 |       | 1.70  | 2.52 | 1.74 |
| orf19.4513 |       | 1.19  | 2.51 | 1.03 |
| orf19.1517 | ARO3  | 1.96  | 2.51 | 1.68 |
| orf19.2344 | ASR1  | 20.69 | 7.14 | 4.75 |
| orf19.5984 |       | 8.72  | 1.11 | 5.88 |
| orf19.7625 | PGA1  | 6.78  | 1.10 | 2.73 |
| orf19.5753 | HGT10 | 6.21  | 2.35 | 1.74 |
| orf19.7481 | MDH1  | 5.84  | 0.89 | 2.43 |
| orf19.5257 |       | 5.23  | 2.31 | 2.00 |
| orf19.3184 |       | 4.96  | 3.15 | 2.99 |
| orf19.5118 | SDS24 | 4.93  | 1.66 | 2.18 |
| orf19.7313 | SSU1  | 4.87  | 3.11 | 3.04 |
| orf19.348  |       | 4.66  | 0.86 | 1.56 |
| orf19.5469 |       | 4.63  | 1.30 | 1.13 |
| CaalfMr16  | RRNL  | 4.61  | 1.78 | 2.13 |
| orf19.5842 |       | 4.49  | 2.03 | 2.20 |
| orf19.4393 | CIT1  | 4.38  | 1.34 | 1.70 |
| orf19.5474 |       | 4.25  | 2.49 | 1.61 |
| orf19.5045 |       | 4.22  | 8.14 | 1.94 |
| orf19.4985 | GUP1  | 4.22  | 2.14 | 2.22 |
| orf19.7350 |       | 4.20  | 1.41 | 2.04 |
| orf19.1359 |       | 4.19  | 2.44 | 1.60 |
| orf19.6475 |       | 4.18  | 1.59 | 2.26 |
| orf19.3073 |       | 4.10  | 1.87 | 1.52 |
| orf19.6661 |       | 4.05  | 1.40 | 3.30 |
| orf19.1632 |       | 3.88  | 2.16 | 2.28 |
| orf19.3508 |       | 3.86  | 1.36 | 1.79 |
| orf19.1168 |       | 3.82  | 0.78 | 1.25 |
| orf19.2270 | SMF12 | 3.73  | 1.60 | 1.76 |
| orf19.6385 | ACO1  | 3.69  | 2.47 | 2.25 |

|               |        |      |      |      |
|---------------|--------|------|------|------|
| orf19.4316    |        | 3.66 | 1.33 | 1.68 |
| orf19.2003    | HNMI1  | 3.62 | 0.79 | 1.28 |
| orf19.2593    | BIO2   | 3.61 | 1.20 | 1.73 |
| orf19.6981    |        | 3.46 | 1.00 | 1.68 |
| orf19.7323    | CBP1   | 3.43 | 1.37 | 2.97 |
| orf19.7229    |        | 3.34 | 1.90 | 1.86 |
| orf19.5804    | HYU1   | 3.34 | 1.88 | 2.37 |
| CaalfMp07     | ATP8   | 3.32 | 1.35 | 1.71 |
| orf19.2787    | PRY1   | 3.27 | 1.36 | 2.28 |
| orf19.2844    |        | 3.26 | 1.29 | 1.86 |
| orf19.4531    |        | 3.19 | 2.02 | 1.29 |
| orf19.6086    | LEU4   | 3.16 | 1.80 | 1.66 |
| orf19.6126    | KGD2   | 3.10 | 1.78 | 1.90 |
| orf19.6460    |        | 3.06 | 1.41 | 2.24 |
| CaalfMt37     | TRND   | 3.06 | 1.81 | 3.06 |
| orf19.620     |        | 3.04 | 1.70 | 3.16 |
| orf19.448     |        | 3.01 | 2.13 | 1.78 |
| orf19.1652    | POX1-3 | 2.99 | 0.86 | 1.23 |
| orf19.7247    | RIM101 | 2.97 | 0.92 | 1.27 |
| orf19.7286    | RPN7   | 2.93 | 2.73 | 1.97 |
| orf19.2172    | ARA1   | 2.93 | 2.45 | 2.15 |
| orf19.3135    |        | 2.92 | 1.71 | 2.14 |
| orf19.637     | SDH2   | 2.92 | 1.38 | 2.04 |
| orf19.1670    | BRO1   | 2.91 | 1.77 | 1.66 |
| orf19.4535    | PTR3   | 2.90 | 2.05 | 1.62 |
| orf19.697     |        | 2.90 | 1.23 | 1.13 |
| orf19.7589    |        | 2.90 | 2.24 | 2.33 |
| orf19.3437    |        | 2.88 | 1.46 | 2.50 |
| orf19.4540    | UBC8   | 2.87 | 2.13 | 2.06 |
| orf19.1012    |        | 2.84 | 1.32 | 2.14 |
| orf19.3689    |        | 2.84 | 0.89 | 1.26 |
| orf19.3898    |        | 2.82 | 1.08 | 2.16 |
| orf19.1805    | PEX14  | 2.80 | 1.89 | 2.01 |
| orf19.1709    |        | 2.78 | 1.15 | 2.08 |
| orf19.88      | ILV5   | 2.78 | 0.77 | 2.38 |
| orf19.4763    |        | 2.77 | 0.92 | 1.66 |
| orf19.6306    |        | 2.77 | 1.41 | 2.41 |
| orf19.2245    |        | 2.76 | 2.40 | 2.99 |
| orf19.121     | ARC18  | 2.75 | 1.91 | 4.38 |
| orf19.7001    | YCK2   | 2.75 | 1.16 | 1.56 |
| orf19.3507    | MCR1   | 2.74 | 1.31 | 1.91 |
| orf19.1625    |        | 2.74 | 1.07 | 1.47 |
| orf19.2933    |        | 2.74 | 1.63 | 1.97 |
| orf19.7251    | WSC4   | 2.73 | 1.07 | 1.47 |
| orf19.3859    |        | 2.70 | 1.04 | 1.89 |
| orf19.6756    |        | 2.69 | 1.81 | 2.03 |
| orf19.298     |        | 2.68 | 1.02 | 1.71 |
| orf19.2730    |        | 2.68 | 1.54 | 1.71 |
| orf19.2568    | IFU5   | 2.68 | 2.60 | 2.17 |
| orf19.4102    | RPN10  | 2.67 | 1.94 | 1.67 |
| orf19.6180    |        | 2.67 | 1.30 | 2.17 |
| orf19.6287    | AAT21  | 2.67 | 0.90 | 1.07 |
| orf19.5749    | SBA1   | 2.66 | 1.90 | 2.05 |
| orf19.6834.10 | TAR1   | 2.65 | 1.08 | 2.18 |
| orf19.3928    |        | 2.64 | 1.33 | 1.67 |
| orf19.4953    |        | 2.64 | 1.54 | 1.34 |
| orf19.6077    |        | 2.63 | 1.00 | 1.41 |
| orf19.7258    | DDI1   | 2.63 | 1.85 | 1.72 |
| orf19.4579    |        | 2.63 | 0.84 | 2.36 |
| orf19.3843    |        | 2.63 | 1.92 | 1.81 |
| orf19.1338    |        | 2.62 | 1.66 | 1.72 |
| orf19.5438    |        | 2.61 | 2.34 | 2.30 |
| orf19.1159    |        | 2.61 | 1.06 | 1.69 |
| orf19.1493    | RAD7   | 2.61 | 2.24 | 1.67 |
| orf19.7224    |        | 2.61 | 1.17 | 1.35 |
| orf19.5419    | ATP5   | 2.60 | 1.58 | 2.00 |
| orf19.711     |        | 2.60 | 2.02 | 1.59 |

|              |       |      |      |      |
|--------------|-------|------|------|------|
| orf19.7498   | LEU1  | 2.58 | 2.15 | 1.78 |
| orf19.4059   |       | 2.58 | 1.67 | 1.50 |
| orf19.7140   |       | 2.57 | 1.13 | 1.62 |
| orf19.2792   | IST2  | 2.57 | 1.26 | 1.55 |
| orf19.6255   |       | 2.57 | 2.18 | 1.92 |
| orf19.2181   |       | 2.56 | 1.06 | 1.76 |
| orf19.1246   |       | 2.55 | 1.10 | 1.67 |
| orf19.3782.2 |       | 2.55 | 1.40 | 1.98 |
| orf19.2599   |       | 2.54 | 0.46 | 2.08 |
| orf19.3401   | CTA1  | 2.54 | 2.30 | 1.53 |
| orf19.7343   |       | 2.53 | 1.67 | 1.54 |
| orf19.4054   | CTA24 | 2.53 | 1.79 | 2.19 |
| orf19.6440   |       | 2.52 | 2.44 | 1.74 |
| orf19.5757   |       | 2.51 | 2.57 | 1.79 |
| orf19.3846   | LYS4  | 2.50 | 2.67 | 1.28 |
| orf19.20     | RTS1  | 2.50 | 1.76 | 2.32 |
| CaalfMp02    | NAD6  | 2.23 | 1.19 | 1.63 |
| CaalfMp04    | COX3A | 1.64 | 0.75 | 0.98 |
| CaalfMt19    | TRNN  | 1.50 | 0.91 | 1.88 |
| CaalfMt39    | TRNS2 | 1.79 | 0.94 | 1.83 |
| orf19.1026   |       | 1.35 | 1.23 | 1.24 |
| orf19.1042   | POR1  | 1.57 | 1.10 | 1.31 |
| orf19.1051   | HTA2  | 0.92 | 0.09 | 0.93 |
| orf19.1052   |       | 1.32 | 0.32 | 1.29 |
| orf19.1054   |       | 2.05 | 0.54 | 1.50 |
| orf19.1057   |       | 1.82 | 1.74 | 2.34 |
| orf19.1059   | HHF1  | 1.18 | 0.11 | 1.35 |
| orf19.1061   | HHT21 | 1.11 | 0.16 | 1.25 |
| orf19.1064   | ACS2  | 0.95 | 0.50 | 0.78 |
| orf19.1082.1 |       | 1.53 | 1.02 | 1.63 |
| orf19.1084   | CDC39 | 1.51 | 1.29 | 1.19 |
| orf19.1085   |       | 1.69 | 1.42 | 1.39 |
| orf19.1086   |       | 1.55 | 1.15 | 1.24 |
| orf19.1098   |       | 0.58 | 0.86 | 0.55 |
| orf19.1099   |       | 1.97 | 1.16 | 2.29 |
| orf19.1105.2 | PGA56 | 1.51 | 0.34 | 1.14 |
| orf19.1115   | GUK1  | 1.07 | 0.66 | 1.04 |
| orf19.1119   | MTR10 | 1.46 | 1.23 | 1.06 |
| orf19.1121   |       | 1.22 | 2.13 | 1.49 |
| orf19.1140   |       | 2.31 | 1.29 | 1.58 |
| orf19.1172   |       | 0.36 | 0.07 | 0.86 |
| orf19.1179   |       | 1.56 | 1.15 | 1.35 |
| orf19.118    | FAD2  | 0.44 | 0.34 | 0.57 |
| orf19.1187   | CPH2  | 1.61 | 1.31 | 1.23 |
| orf19.1191   |       | 2.07 | 1.58 | 1.91 |
| orf19.1203.1 |       | 1.91 | 1.11 | 1.55 |
| orf19.1210   |       | 1.55 | 1.45 | 1.73 |
| orf19.1212   |       | 1.99 | 1.04 | 1.52 |
| orf19.1232   | VRG4  | 1.66 | 0.56 | 1.27 |
| orf19.1240   |       | 2.00 | 1.67 | 1.35 |
| orf19.1244   | GYP2  | 1.96 | 0.94 | 1.71 |
| orf19.1254   | SEC23 | 1.81 | 1.02 | 1.54 |
| orf19.1267   |       | 1.54 | 1.68 | 1.14 |
| orf19.1273   |       | 1.37 | 0.87 | 1.51 |
| orf19.1279   | CDS1  | 1.75 | 1.10 | 1.84 |
| orf19.1282   |       | 1.33 | 0.57 | 1.45 |
| orf19.1299   | RPN6  | 1.73 | 1.64 | 1.69 |
| orf19.1352   |       | 2.22 | 1.04 | 1.60 |
| orf19.1357   | FCY21 | 0.48 | 0.87 | 0.47 |
| orf19.1376   |       | 1.74 | 1.17 | 1.54 |
| orf19.1389   |       | 1.58 | 1.08 | 1.12 |
| orf19.139    | TRA1  | 1.68 | 1.17 | 1.04 |
| orf19.1390   | PMI1  | 1.76 | 0.89 | 1.59 |
| orf19.1394   |       | 1.88 | 1.56 | 1.15 |
| orf19.1404   |       | 0.56 | 0.87 | 0.40 |
| orf19.1467   | COX13 | 1.73 | 0.91 | 1.48 |
| orf19.1468   |       | 2.38 | 1.75 | 2.13 |

|              |        |      |      |      |
|--------------|--------|------|------|------|
| orf19.1471   | COX4   | 2.07 | 1.03 | 1.69 |
| orf19.1474   | SLA1   | 1.92 | 1.30 | 1.44 |
| orf19.1478   |        | 1.70 | 0.79 | 1.62 |
| orf19.1486   |        | 2.11 | 1.54 | 1.85 |
| orf19.1514   |        | 1.51 | 1.02 | 1.42 |
| orf19.1531   |        | 1.79 | 0.97 | 1.33 |
| orf19.1544   |        | 1.61 | 1.47 | 1.88 |
| orf19.1552   | CPR3   | 1.62 | 1.35 | 1.41 |
| orf19.1553   | ENT3   | 1.85 | 1.20 | 1.51 |
| orf19.1559   | HOM2   | 1.70 | 2.16 | 1.30 |
| orf19.1560   | POB3   | 1.61 | 1.40 | 1.24 |
| orf19.1564   |        | 1.99 | 0.83 | 1.81 |
| orf19.1570   | ERG7   | 2.28 | 1.40 | 1.47 |
| orf19.1595   |        | 1.48 | 1.15 | 0.96 |
| orf19.1597   | ABG1   | 2.44 | 0.61 | 1.66 |
| orf19.1618   | GFA1   | 1.89 | 0.91 | 1.25 |
| orf19.1628   | LAP41  | 2.33 | 1.38 | 1.63 |
| orf19.1630   |        | 1.35 | 0.76 | 0.90 |
| orf19.1631   | ERG6   | 1.86 | 0.47 | 1.37 |
| orf19.1642   |        | 0.94 | 0.75 | 0.39 |
| orf19.1643   |        | 1.70 | 1.12 | 1.04 |
| orf19.1649   |        | 1.57 | 1.55 | 1.77 |
| orf19.1653   |        | 0.68 | 1.76 | 0.87 |
| orf19.1654   |        | 1.16 | 2.24 | 1.35 |
| orf19.1655.3 |        | 1.58 | 0.99 | 1.43 |
| orf19.1658   |        | 2.45 | 1.48 | 1.44 |
| orf19.1663   | MNT2   | 0.98 | 0.45 | 0.98 |
| orf19.1665   | MNT1   | 1.84 | 0.58 | 1.55 |
| orf19.1674   |        | 1.29 | 1.25 | 1.10 |
| orf19.1680   |        | 2.12 | 0.82 | 1.56 |
| orf19.1682   |        | 2.22 | 1.44 | 1.87 |
| orf19.1683   | PPH21  | 2.01 | 1.35 | 1.91 |
| orf19.1690   | TOS1   | 1.34 | 0.20 | 0.99 |
| orf19.1700   | RPS7A  | 1.15 | 0.67 | 1.05 |
| orf19.1710   |        | 1.31 | 1.02 | 1.19 |
| orf19.1721   | NCE103 | 0.33 | 0.73 | 0.29 |
| orf19.1727   | PMC1   | 1.89 | 0.65 | 1.10 |
| orf19.1738   | UGP1   | 2.24 | 0.73 | 2.11 |
| orf19.1750   |        | 1.27 | 1.18 | 1.20 |
| orf19.1759   | PHO23  | 2.37 | 1.42 | 1.52 |
| orf19.1761   |        | 2.21 | 1.47 | 1.81 |
| orf19.1779   | MP65   | 1.20 | 0.22 | 0.86 |
| orf19.1789.1 | LYS1   | 1.83 | 1.32 | 1.21 |
| orf19.1790   |        | 2.47 | 1.67 | 1.66 |
| orf19.1792   |        | 2.04 | 1.16 | 1.41 |
| orf19.1795   | PUF3   | 1.11 | 1.08 | 1.61 |
| orf19.1796   |        | 1.67 | 1.76 | 1.19 |
| orf19.18     | IMH3   | 0.97 | 0.54 | 0.78 |
| orf19.1801   |        | 1.72 | 0.80 | 1.33 |
| orf19.1814   |        | 1.74 | 1.54 | 1.48 |
| orf19.1840   |        | 1.72 | 0.99 | 1.32 |
| orf19.1852   |        | 1.86 | 1.34 | 1.62 |
| orf19.1865   |        | 1.43 | 0.92 | 1.32 |
| orf19.1866   |        | 1.77 | 1.48 | 1.78 |
| orf19.1868   | RNR22  | 0.37 | 2.02 | 0.96 |
| orf19.1872   |        | 1.96 | 1.07 | 1.58 |
| orf19.1873   |        | 1.74 | 1.57 | 2.11 |
| orf19.1881   |        | 1.45 | 0.98 | 1.51 |
| orf19.1885   | TAF4   | 1.74 | 1.83 | 2.20 |
| orf19.1886   | RCL1   | 0.82 | 0.94 | 0.57 |
| orf19.1891   | Apr-01 | 2.04 | 0.91 | 1.40 |
| orf19.1897   |        | 1.24 | 0.73 | 0.87 |
| orf19.19     |        | 1.16 | 0.52 | 0.76 |
| orf19.1902   | NOC4   | 0.67 | 1.03 | 0.57 |
| orf19.1903   |        | 2.12 | 1.36 | 1.09 |
| orf19.1905   |        | 2.05 | 1.61 | 1.81 |
| orf19.1917   |        | 2.40 | 1.34 | 1.59 |

|              |       |      |      |      |
|--------------|-------|------|------|------|
| orf19.1936   | SNF1  | 2.00 | 1.33 | 1.31 |
| orf19.1940   |       | 1.92 | 1.21 | 1.79 |
| orf19.1946   |       | 1.39 | 1.24 | 1.42 |
| orf19.1949   | VPS1  | 2.02 | 1.27 | 1.63 |
| orf19.1964   |       | 0.34 | 0.24 | 0.47 |
| orf19.1978   | GIT2  | 1.61 | 0.36 | 1.23 |
| orf19.1986   | ARO2  | 1.47 | 1.61 | 1.30 |
| orf19.1989   | DCW1  | 1.71 | 0.73 | 1.20 |
| orf19.1991   |       | 1.84 | 1.05 | 1.32 |
| orf19.1993   |       | 1.73 | 1.87 | 1.68 |
| orf19.1996   | CHA1  | 0.81 | 0.20 | 0.41 |
| orf19.1997   |       | 0.82 | 0.31 | 0.72 |
| orf19.200    |       | 2.00 | 2.08 | 1.74 |
| orf19.2008   |       | 2.25 | 1.53 | 1.70 |
| orf19.2013   | KAR2  | 2.37 | 1.05 | 1.65 |
| orf19.2029   |       | 2.47 | 1.62 | 1.71 |
| orf19.2057   |       | 1.69 | 1.38 | 1.54 |
| orf19.2070   |       | 1.87 | 1.05 | 1.35 |
| orf19.2093   | RFA1  | 1.64 | 0.94 | 1.80 |
| orf19.2107   | MUQ1  | 1.49 | 2.12 | 1.24 |
| orf19.2113   |       | 2.26 | 0.68 | 1.58 |
| orf19.2117   |       | 2.44 | 1.17 | 2.01 |
| orf19.2119   | NDT80 | 1.22 | 0.97 | 0.74 |
| orf19.2121   |       | 0.53 | 0.63 | 0.42 |
| orf19.213    |       | 2.23 | 2.42 | 2.25 |
| orf19.2131   |       | 2.12 | 1.72 | 1.89 |
| orf19.2132   |       | 1.27 | 1.82 | 1.46 |
| orf19.2150   |       | 1.54 | 0.95 | 1.35 |
| orf19.2156   | NAG1  | 1.97 | 1.49 | 1.11 |
| orf19.2163   |       | 1.69 | 0.92 | 1.36 |
| orf19.2170   | PHM7  | 1.75 | 0.48 | 1.13 |
| orf19.2179   | SIT1  | 0.12 | 0.19 | 0.15 |
| orf19.2180   |       | 1.86 | 0.94 | 1.28 |
| orf19.2182   | BLM3  | 1.73 | 1.91 | 1.38 |
| orf19.2184   |       | 2.40 | 1.28 | 1.99 |
| orf19.2186   |       | 2.08 | 1.15 | 1.45 |
| orf19.2193   | PRS5  | 1.05 | 1.30 | 0.72 |
| orf19.2233   | PRE2  | 1.91 | 1.57 | 1.50 |
| orf19.2241   | PST1  | 2.29 | 1.74 | 1.55 |
| orf19.2251   | AAH1  | 0.14 | 1.22 | 0.18 |
| orf19.2263   |       | 2.36 | 1.85 | 2.29 |
| orf19.2267   | RFA2  | 2.28 | 1.23 | 1.95 |
| orf19.2276   |       | 1.78 | 0.91 | 1.67 |
| orf19.2277   | TPK2  | 1.84 | 1.14 | 1.76 |
| orf19.2289   | ARP3  | 1.85 | 1.68 | 1.34 |
| orf19.229    |       | 2.02 | 1.84 | 1.54 |
| orf19.2295   |       | 2.10 | 1.68 | 2.15 |
| orf19.23     | RTA3  | 1.90 | 1.16 | 1.24 |
| orf19.2307   |       | 1.59 | 1.82 | 1.65 |
| orf19.2308   |       | 2.35 | 2.34 | 1.20 |
| orf19.231    | APL2  | 1.86 | 1.03 | 1.14 |
| orf19.2314   |       | 0.60 | 0.55 | 0.56 |
| orf19.2322.3 |       | 1.84 | 1.32 | 2.02 |
| orf19.2341   |       | 2.08 | 1.57 | 1.62 |
| orf19.2353   |       | 2.14 | 0.82 | 1.10 |
| orf19.236    | RPL9B | 1.09 | 0.56 | 0.95 |
| orf19.2385   | KTI12 | 0.83 | 0.78 | 0.53 |
| orf19.239    |       | 1.33 | 0.99 | 1.18 |
| orf19.2402   | SSU72 | 2.06 | 1.75 | 1.29 |
| orf19.242.2  |       | 2.11 | 1.25 | 1.82 |
| orf19.2439.1 |       | 1.90 | 1.28 | 1.76 |
| orf19.2444   | CHS7  | 1.64 | 0.40 | 1.19 |
| orf19.2459   |       | 1.40 | 1.04 | 1.35 |
| orf19.2518   |       | 1.67 | 1.40 | 1.66 |
| orf19.252    |       | 1.73 | 1.16 | 1.27 |
| orf19.253    |       | 1.42 | 0.50 | 1.13 |
| orf19.2533.1 |       | 1.62 | 0.44 | 1.40 |

|              |       |      |      |      |
|--------------|-------|------|------|------|
| orf19.2534   | PIN4  | 1.81 | 1.22 | 1.29 |
| orf19.2537   |       | 2.05 | 1.20 | 1.52 |
| orf19.2546   | TRP2  | 1.74 | 1.43 | 1.52 |
| orf19.2571   | SEC4  | 1.34 | 0.83 | 1.17 |
| orf19.2582   |       | 1.70 | 1.46 | 1.13 |
| orf19.2644   | QCR2  | 2.41 | 1.25 | 1.63 |
| orf19.2668   | RHD2  | 1.38 | 1.69 | 1.58 |
| orf19.2673   |       | 1.93 | 1.35 | 1.44 |
| orf19.2685   | PGA54 | 1.17 | 0.36 | 1.15 |
| orf19.2688   |       | 0.55 | 0.94 | 0.44 |
| orf19.2699   | ABP1  | 2.24 | 1.69 | 1.53 |
| orf19.2706   | CRH11 | 1.72 | 0.73 | 1.36 |
| orf19.2707.1 | QCR9  | 1.46 | 0.88 | 1.43 |
| orf19.2731   |       | 1.74 | 1.53 | 1.63 |
| orf19.2746   |       | 1.87 | 0.46 | 1.33 |
| orf19.2747   | RGT1  | 1.41 | 0.97 | 0.93 |
| orf19.2770.1 | SOD1  | 2.47 | 1.91 | 1.94 |
| orf19.2777   |       | 1.39 | 0.25 | 1.06 |
| orf19.2778   |       | 1.73 | 1.37 | 1.22 |
| orf19.2782   |       | 2.38 | 1.70 | 1.65 |
| orf19.279    |       | 2.31 | 2.28 | 1.85 |
| orf19.2821   |       | 1.95 | 1.35 | 1.58 |
| orf19.2831   | RPC31 | 1.44 | 1.35 | 1.17 |
| orf19.284    |       | 1.50 | 0.91 | 1.36 |
| orf19.2849   | AQY1  | 0.28 | 0.99 | 0.26 |
| orf19.285    |       | 2.34 | 2.03 | 1.72 |
| orf19.287    |       | 1.34 | 0.86 | 1.33 |
| orf19.2871   | SDH12 | 2.15 | 0.61 | 1.52 |
| orf19.2877   | PDC11 | 0.76 | 0.65 | 0.76 |
| orf19.2884   | CDC68 | 2.23 | 1.43 | 1.28 |
| orf19.2888   |       | 1.59 | 1.30 | 1.20 |
| orf19.290    | KRE5  | 1.75 | 1.17 | 1.54 |
| orf19.2904   |       | 1.49 | 1.03 | 1.10 |
| orf19.2909   | ERG26 | 1.62 | 1.38 | 1.09 |
| orf19.291    |       | 1.46 | 1.02 | 1.56 |
| orf19.2937   | PMM1  | 1.49 | 0.87 | 1.39 |
| orf19.2942   | DIP5  | 2.26 | 0.19 | 0.72 |
| orf19.2951   | HOM6  | 1.55 | 1.03 | 1.32 |
| orf19.2964   |       | 1.96 | 0.70 | 1.24 |
| orf19.2972   | PDE2  | 0.90 | 1.85 | 0.50 |
| orf19.2974   | YKT6  | 1.82 | 1.64 | 1.80 |
| orf19.2977   |       | 1.10 | 2.16 | 0.97 |
| orf19.2985   |       | 2.46 | 2.19 | 2.45 |
| orf19.2998   | TSR2  | 0.96 | 0.74 | 0.69 |
| orf19.3003   |       | 1.76 | 0.91 | 1.24 |
| orf19.3006   |       | 1.99 | 1.64 | 1.34 |
| orf19.3010.1 | ECM33 | 1.61 | 0.42 | 1.31 |
| orf19.3013   | CDC12 | 1.70 | 1.19 | 1.22 |
| orf19.3047   |       | 2.03 | 1.28 | 1.86 |
| orf19.3052   | YPT1  | 1.88 | 1.07 | 1.44 |
| orf19.3060   |       | 1.91 | 0.90 | 1.69 |
| orf19.3066   | ENG1  | 0.97 | 0.30 | 1.13 |
| orf19.3074   | TLO10 | 1.92 | 1.30 | 1.32 |
| orf19.3077   | VID21 | 2.04 | 1.31 | 1.75 |
| orf19.3089   |       | 1.40 | 0.77 | 0.74 |
| orf19.3093   | MSH2  | 2.25 | 1.07 | 1.51 |
| orf19.3116   | EXM2  | 2.00 | 1.16 | 1.37 |
| orf19.3123   | RPT5  | 1.94 | 1.72 | 1.33 |
| orf19.3128   |       | 2.28 | 1.71 | 1.56 |
| orf19.3136   |       | 2.09 | 1.12 | 1.67 |
| orf19.3160   | HSP12 | 2.19 | 1.60 | 1.78 |
| orf19.3161   |       | 1.24 | 1.86 | 0.76 |
| orf19.3168   | RPN8  | 1.86 | 2.48 | 1.72 |
| orf19.3169   |       | 1.59 | 1.58 | 1.17 |
| orf19.3183   |       | 2.18 | 2.08 | 1.67 |
| orf19.3191   |       | 1.50 | 0.82 | 0.82 |
| orf19.3197   | PAP1  | 2.27 | 1.18 | 1.43 |



|              |        |      |      |      |
|--------------|--------|------|------|------|
| orf19.3198   | OBPA   | 1.88 | 1.12 | 1.42 |
| orf19.3206   |        | 2.09 | 1.34 | 1.38 |
| orf19.3215   |        | 2.14 | 1.10 | 1.81 |
| orf19.3220   |        | 0.81 | 0.88 | 0.48 |
| orf19.3223   | ATP3   | 2.28 | 1.33 | 1.94 |
| orf19.3224   |        | 2.42 | 1.42 | 1.75 |
| orf19.3225   |        | 1.56 | 0.75 | 1.14 |
| orf19.3237   |        | 2.12 | 1.02 | 1.60 |
| orf19.3243   | SRP54  | 2.02 | 1.52 | 1.39 |
| orf19.3259   |        | 2.31 | 1.15 | 1.74 |
| orf19.3260   |        | 1.97 | 2.32 | 1.38 |
| orf19.3288   | NMA111 | 0.70 | 0.69 | 0.62 |
| orf19.3301   |        | 1.56 | 2.22 | 0.91 |
| orf19.3307   |        | 2.23 | 2.50 | 2.15 |
| orf19.3309   |        | 1.84 | 1.66 | 1.10 |
| orf19.3319   |        | 1.61 | 1.14 | 1.41 |
| orf19.3321   |        | 1.79 | 1.23 | 1.14 |
| orf19.3322   | DUT1   | 2.23 | 0.41 | 1.89 |
| orf19.3335   |        | 2.33 | 0.93 | 1.31 |
| orf19.337    |        | 1.83 | 1.03 | 1.40 |
| orf19.3396   | HCH1   | 1.55 | 1.79 | 1.54 |
| orf19.3426   | ANB1   | 1.38 | 0.98 | 1.21 |
| orf19.3428   |        | 1.96 | 0.75 | 1.18 |
| orf19.3441   | FRP6   | 1.72 | 0.72 | 1.40 |
| orf19.3447   |        | 1.58 | 2.20 | 1.33 |
| orf19.3449.2 |        | 2.28 | 2.34 | 1.68 |
| orf19.3458   |        | 2.07 | 1.13 | 1.62 |
| orf19.3465   | RPL10A | 0.98 | 0.58 | 0.80 |
| orf19.3467   |        | 1.41 | 1.24 | 1.32 |
| orf19.3475   |        | 2.24 | 0.66 | 1.98 |
| orf19.3496   |        | 1.65 | 1.30 | 1.42 |
| orf19.3504   | RPL23A | 1.05 | 0.63 | 0.97 |
| orf19.351    |        | 1.63 | 0.92 | 1.04 |
| orf19.3528   |        | 1.62 | 1.06 | 1.67 |
| orf19.3535   |        | 2.03 | 1.09 | 1.40 |
| orf19.3542   | LEM3   | 2.44 | 1.11 | 1.47 |
| orf19.3546   |        | 1.69 | 1.12 | 1.37 |
| orf19.3554   | AAT1   | 1.82 | 0.84 | 1.50 |
| orf19.3563   |        | 1.50 | 0.95 | 1.07 |
| orf19.3575   | CDC19  | 0.47 | 0.55 | 0.66 |
| orf19.3593   | RPT6   | 1.83 | 1.86 | 1.49 |
| orf19.3628   | RSP5   | 1.76 | 2.13 | 1.39 |
| orf19.364    |        | 1.83 | 0.97 | 1.56 |
| orf19.3642   | SUN41  | 1.22 | 0.13 | 1.09 |
| orf19.3649   |        | 1.26 | 1.73 | 1.01 |
| orf19.3651   | PGK1   | 0.64 | 0.66 | 0.83 |
| orf19.3653   | FAT1   | 1.63 | 1.07 | 1.63 |
| orf19.366    |        | 1.83 | 1.31 | 1.44 |
| orf19.3676   | ABP140 | 0.93 | 0.62 | 0.97 |
| orf19.3680   | Sep-07 | 1.96 | 1.10 | 1.23 |
| orf19.3683   |        | 1.78 | 1.55 | 1.29 |
| orf19.3686   |        | 2.37 | 1.40 | 1.48 |
| orf19.3688   |        | 2.25 | 1.37 | 2.09 |
| orf19.3691   |        | 2.21 | 1.93 | 1.57 |
| orf19.3694   |        | 1.39 | 0.69 | 1.16 |
| orf19.37     |        | 1.69 | 1.45 | 0.78 |
| orf19.3703   |        | 1.71 | 1.76 | 2.21 |
| orf19.3710   | YHB5   | 0.65 | 0.63 | 1.47 |
| orf19.376    |        | 2.18 | 1.59 | 2.08 |
| orf19.3764   | GSG1   | 0.61 | 0.64 | 0.63 |
| orf19.3765   | RAX2   | 1.93 | 0.99 | 1.60 |
| orf19.3767   |        | 1.67 | 1.48 | 1.10 |
| orf19.3829   | PHR1   | 1.32 | 0.32 | 0.84 |
| orf19.384    |        | 1.97 | 1.04 | 1.28 |
| orf19.3844   | MRP8   | 2.36 | 1.11 | 1.78 |
| orf19.385    | GCV2   | 1.00 | 0.23 | 0.73 |
| orf19.3861   | SIS1   | 2.47 | 1.48 | 2.15 |

|              |       |      |      |      |
|--------------|-------|------|------|------|
| orf19.3869   |       | 0.67 | 0.20 | 0.65 |
| orf19.3872   |       | 1.81 | 0.56 | 1.26 |
| orf19.3873   | ARC40 | 1.64 | 0.88 | 1.53 |
| orf19.3884   | FGR50 | 1.40 | 1.59 | 1.21 |
| orf19.3889   |       | 1.64 | 0.78 | 1.52 |
| orf19.3890   |       | 1.15 | 1.09 | 1.28 |
| orf19.390    | CDC42 | 1.64 | 0.61 | 1.58 |
| orf19.3920   |       | 1.59 | 0.81 | 1.54 |
| orf19.3930   | YUH2  | 1.72 | 1.64 | 1.47 |
| orf19.3934   | CAR1  | 2.17 | 1.09 | 1.48 |
| orf19.394    |       | 1.60 | 1.33 | 1.22 |
| orf19.3944   | GRR1  | 1.92 | 1.71 | 1.23 |
| orf19.3967   | PFK1  | 0.61 | 1.58 | 0.77 |
| orf19.3974   | PUT2  | 1.64 | 0.80 | 1.19 |
| orf19.3978   |       | 0.57 | 1.23 | 0.52 |
| orf19.399    |       | 1.09 | 1.84 | 1.01 |
| orf19.3994   |       | 2.18 | 0.94 | 1.58 |
| orf19.3997   | ADH1  | 1.14 | 0.77 | 0.91 |
| orf19.4009   | CNB1  | 1.40 | 1.02 | 1.44 |
| orf19.4010   | PAN3  | 1.62 | 1.49 | 1.64 |
| orf19.4016   |       | 1.87 | 1.01 | 1.30 |
| orf19.4021   |       | 1.18 | 0.86 | 1.14 |
| orf19.4023   | MRP2  | 1.49 | 0.84 | 1.28 |
| orf19.4024   | RIB5  | 2.05 | 1.08 | 1.77 |
| orf19.4028   |       | 2.22 | 1.87 | 1.50 |
| orf19.4034   |       | 2.46 | 2.08 | 1.59 |
| orf19.4046   |       | 1.50 | 0.61 | 0.85 |
| orf19.4055   |       | 2.03 | 1.31 | 1.35 |
| orf19.4056   | GAT2  | 0.21 | 0.56 | 0.22 |
| orf19.4076   | MET10 | 1.33 | 0.77 | 1.15 |
| orf19.4088   |       | 1.90 | 1.76 | 1.29 |
| orf19.410.3  |       | 1.86 | 2.28 | 1.31 |
| orf19.4107   |       | 2.05 | 1.13 | 1.12 |
| orf19.4118   | CNT   | 0.37 | 0.62 | 0.41 |
| orf19.4123   |       | 2.14 | 1.30 | 1.63 |
| orf19.4131   |       | 1.75 | 2.20 | 1.10 |
| orf19.4144   |       | 1.84 | 1.65 | 1.57 |
| orf19.415    |       | 2.33 | 1.17 | 1.53 |
| orf19.4152   | CEF3  | 1.01 | 0.62 | 0.82 |
| orf19.4157   |       | 1.75 | 0.78 | 1.07 |
| orf19.4173   |       | 0.91 | 0.77 | 0.57 |
| orf19.4180   |       | 1.92 | 1.34 | 1.50 |
| orf19.4181   | SPC2  | 1.35 | 1.11 | 1.45 |
| orf19.4184   |       | 1.49 | 1.61 | 1.51 |
| orf19.4191.1 |       | 1.61 | 1.44 | 1.40 |
| orf19.4197   | YHM2  | 1.94 | 1.07 | 1.35 |
| orf19.42     |       | 2.14 | 2.33 | 1.79 |
| orf19.4201   | NHX1  | 2.24 | 1.13 | 1.57 |
| orf19.4215   | FET34 | 0.79 | 0.34 | 0.57 |
| orf19.4220   |       | 1.78 | 1.45 | 1.61 |
| orf19.4228   |       | 1.49 | 0.86 | 1.28 |
| orf19.4230   |       | 1.50 | 1.59 | 1.41 |
| orf19.4236   | RET2  | 2.15 | 1.16 | 1.44 |
| orf19.4248   |       | 1.28 | 0.83 | 1.34 |
| orf19.426    |       | 1.31 | 0.69 | 0.95 |
| orf19.4271   |       | 1.59 | 1.31 | 1.52 |
| orf19.4275   | RAD9  | 1.95 | 1.51 | 1.86 |
| orf19.4278   |       | 1.00 | 1.67 | 1.28 |
| orf19.428    |       | 1.75 | 0.92 | 1.38 |
| orf19.4304   | GAP1  | 0.55 | 2.18 | 0.55 |
| orf19.4317   | GRE3  | 2.30 | 2.21 | 2.09 |
| orf19.4339   | VPS4  | 2.44 | 1.90 | 1.20 |
| orf19.4340.1 |       | 1.81 | 1.63 | 1.29 |
| orf19.4363   | SGD1  | 1.80 | 1.78 | 1.15 |
| orf19.4395   |       | 1.77 | 1.32 | 1.28 |
| orf19.4406   |       | 2.05 | 2.33 | 2.31 |
| orf19.441    | RPT1  | 1.70 | 2.06 | 1.21 |

|              |        |      |      |      |
|--------------|--------|------|------|------|
| orf19.4416   | VPS13  | 2.27 | 1.77 | 1.26 |
| orf19.4421   |        | 1.55 | 1.59 | 1.86 |
| orf19.4423   |        | 1.92 | 1.94 | 1.64 |
| orf19.4445   |        | 1.25 | 2.34 | 0.45 |
| orf19.4447   | YMC1   | 1.30 | 0.82 | 1.20 |
| orf19.4448   | SOG2   | 1.37 | 1.95 | 1.08 |
| orf19.4468   |        | 2.39 | 0.93 | 1.74 |
| orf19.4469   |        | 1.70 | 1.85 | 1.51 |
| orf19.4488   |        | 1.87 | 1.11 | 1.22 |
| orf19.4502   |        | 1.19 | 1.09 | 1.36 |
| orf19.4503   |        | 2.08 | 1.45 | 1.63 |
| orf19.4516   |        | 1.94 | 1.66 | 1.19 |
| orf19.4529   |        | 1.54 | 1.83 | 2.06 |
| orf19.4555   | ALS4   | 0.54 | 0.68 | 0.46 |
| orf19.4575   |        | 2.12 | 1.23 | 1.60 |
| orf19.4585   | TFG1   | 1.41 | 1.12 | 1.20 |
| orf19.4594   |        | 1.90 | 1.85 | 1.85 |
| orf19.4597   |        | 2.23 | 2.18 | 2.39 |
| orf19.4599   | PHO89  | 0.54 | 0.38 | 0.82 |
| orf19.4600.1 |        | 1.85 | 0.99 | 1.67 |
| orf19.4602   | MDH1-1 | 2.25 | 1.15 | 1.70 |
| orf19.4603   | ARL1   | 1.72 | 2.27 | 1.58 |
| orf19.4609   |        | 1.75 | 1.32 | 1.63 |
| orf19.4616   | POL30  | 1.75 | 0.96 | 1.68 |
| orf19.4618   | FBA1   | 0.56 | 0.64 | 0.63 |
| orf19.4626   |        | 1.98 | 1.11 | 1.16 |
| orf19.4631   | ERG251 | 1.48 | 1.01 | 1.55 |
| orf19.4645   | BEM1   | 1.70 | 1.31 | 1.84 |
| orf19.4650   | ILV6   | 1.67 | 1.26 | 1.43 |
| orf19.4651   | PGA53  | 1.30 | 0.93 | 1.33 |
| orf19.4669   | AAT22  | 1.78 | 0.97 | 1.63 |
| orf19.4688   | DAG7   | 0.80 | 0.38 | 0.84 |
| orf19.4698   | PTC8   | 1.91 | 2.16 | 0.94 |
| orf19.4720   | CTR2   | 2.00 | 1.30 | 1.35 |
| orf19.4722   |        | 1.64 | 1.02 | 2.11 |
| orf19.4728   |        | 1.68 | 1.81 | 1.50 |
| orf19.4729   |        | 1.30 | 1.20 | 0.89 |
| orf19.4739   |        | 0.49 | 0.79 | 0.43 |
| orf19.4758   |        | 2.21 | 0.98 | 1.22 |
| orf19.4759   | COX5   | 2.19 | 1.35 | 1.70 |
| orf19.4765   | PGA6   | 1.09 | 0.14 | 1.09 |
| orf19.4785   | PTC1   | 2.25 | 1.31 | 1.61 |
| orf19.479.2  |        | 2.22 | 1.63 | 1.81 |
| orf19.4798   |        | 2.10 | 1.04 | 1.64 |
| orf19.4829   | DOA1   | 2.03 | 1.90 | 2.13 |
| orf19.4831   |        | 1.64 | 0.69 | 1.43 |
| orf19.4841   | SHY1   | 1.43 | 1.44 | 1.68 |
| orf19.4843   |        | 2.20 | 1.07 | 1.79 |
| orf19.4851   | TFA1   | 1.56 | 1.29 | 1.68 |
| orf19.4878   |        | 2.50 | 1.45 | 1.88 |
| orf19.4892   | TPK1   | 0.67 | 2.19 | 0.65 |
| orf19.4905   |        | 1.62 | 1.67 | 1.66 |
| orf19.4906   |        | 0.85 | 1.01 | 0.76 |
| orf19.491    |        | 2.26 | 0.89 | 1.85 |
| orf19.4910   | FGR41  | 1.29 | 0.57 | 0.83 |
| orf19.492    | ADE17  | 1.60 | 0.91 | 1.05 |
| orf19.4930   | SPC3   | 2.25 | 1.24 | 2.31 |
| orf19.4933   | FAD3   | 0.56 | 0.28 | 0.52 |
| orf19.4945   | MSH6   | 2.01 | 0.88 | 2.08 |
| orf19.4952   |        | 1.53 | 0.59 | 0.97 |
| orf19.4954   |        | 2.49 | 0.62 | 1.77 |
| orf19.4956   | RPN1   | 1.68 | 1.93 | 1.28 |
| orf19.496    |        | 2.23 | 0.96 | 1.96 |
| orf19.4961   | STP2   | 2.46 | 1.44 | 1.48 |
| orf19.4967   | COX19  | 1.49 | 0.77 | 0.80 |
| orf19.4969   | KEM1   | 1.89 | 2.10 | 1.90 |
| orf19.4994   |        | 2.43 | 1.99 | 2.35 |

|              |        |      |      |      |
|--------------|--------|------|------|------|
| orf19.5006.1 |        | 1.57 | 1.33 | 1.56 |
| orf19.5013   | AGM1   | 1.96 | 1.10 | 1.30 |
| orf19.5019   |        | 1.59 | 0.75 | 1.82 |
| orf19.5032   | SIM1   | 0.80 | 0.27 | 0.65 |
| orf19.504    |        | 1.43 | 1.59 | 1.05 |
| orf19.5073   | DPM1   | 1.76 | 1.23 | 1.55 |
| orf19.5074   |        | 1.67 | 1.63 | 2.07 |
| orf19.5077   |        | 1.54 | 0.91 | 1.15 |
| orf19.5078   |        | 1.36 | 1.43 | 1.51 |
| orf19.508    | QDR1   | 0.29 | 0.43 | 0.48 |
| orf19.5087   | BUD6   | 2.24 | 1.36 | 1.48 |
| orf19.5095   |        | 2.05 | 1.72 | 1.41 |
| orf19.5101   | CCR4   | 1.19 | 1.10 | 1.06 |
| orf19.511    |        | 2.12 | 0.64 | 1.74 |
| orf19.5112   | TKL1   | 1.84 | 1.75 | 1.29 |
| orf19.5130   | PDI1   | 1.93 | 1.58 | 1.53 |
| orf19.5137   |        | 0.99 | 0.22 | 0.82 |
| orf19.5139   |        | 2.13 | 1.40 | 1.82 |
| orf19.5141   |        | 1.30 | 0.65 | 1.04 |
| orf19.5156   |        | 2.32 | 0.56 | 1.70 |
| orf19.5175   |        | 1.49 | 1.73 | 1.21 |
| orf19.5177   |        | 1.37 | 1.48 | 1.60 |
| orf19.5183   |        | 1.55 | 1.26 | 1.36 |
| orf19.5185   |        | 1.65 | 1.34 | 1.55 |
| orf19.5188   | CHS1   | 1.22 | 0.42 | 0.98 |
| orf19.5194.1 |        | 1.97 | 2.04 | 1.68 |
| orf19.52     |        | 1.52 | 1.24 | 1.17 |
| orf19.5207   |        | 0.63 | 0.60 | 0.58 |
| orf19.522    |        | 1.69 | 2.11 | 1.37 |
| orf19.5225.2 | RPL27A | 1.22 | 0.76 | 1.18 |
| orf19.5231.2 |        | 2.04 | 0.73 | 1.74 |
| orf19.5260   | RPN2   | 1.92 | 1.71 | 1.40 |
| orf19.5261   |        | 1.66 | 0.92 | 0.85 |
| orf19.5280   | MUP1   | 0.88 | 0.69 | 0.45 |
| orf19.5285   | PST3   | 1.54 | 2.09 | 1.08 |
| orf19.5287   |        | 1.26 | 0.96 | 1.34 |
| orf19.5303   | PGA30  | 1.60 | 0.66 | 1.26 |
| orf19.5305   | RHD3   | 0.63 | 1.99 | 0.67 |
| orf19.5325   | KIN3   | 1.62 | 1.30 | 1.45 |
| orf19.5333   |        | 1.29 | 0.58 | 0.85 |
| orf19.5338   | GAL4   | 1.66 | 1.83 | 1.26 |
| orf19.5345   |        | 2.32 | 1.79 | 1.70 |
| orf19.5370   |        | 1.98 | 1.70 | 1.73 |
| orf19.5379   | ERG4   | 1.74 | 0.81 | 1.45 |
| orf19.5395   |        | 1.94 | 1.56 | 2.01 |
| orf19.5440   | RPT2   | 1.87 | 2.09 | 1.62 |
| orf19.5443   |        | 1.65 | 1.37 | 1.71 |
| orf19.5445   | GLO3   | 1.97 | 1.00 | 1.60 |
| orf19.5446   |        | 2.11 | 1.09 | 1.60 |
| orf19.5450   |        | 2.24 | 1.13 | 1.61 |
| orf19.5457   |        | 2.09 | 0.84 | 1.56 |
| orf19.5467   | TLO7   | 2.05 | 1.62 | 2.06 |
| orf19.547    |        | 2.26 | 1.01 | 1.70 |
| orf19.548    | CDC10  | 1.59 | 0.81 | 1.44 |
| orf19.5484   |        | 1.73 | 1.14 | 1.26 |
| orf19.5491.1 | ATP14  | 1.91 | 1.09 | 1.56 |
| orf19.5507   | ENP1   | 0.33 | 0.67 | 0.30 |
| orf19.551    |        | 1.13 | 0.74 | 0.73 |
| orf19.5522   |        | 1.92 | 1.03 | 1.29 |
| orf19.5531   | CDC37  | 1.92 | 1.88 | 1.41 |
| orf19.5544   | SAC6   | 2.09 | 1.74 | 1.50 |
| orf19.5546   |        | 1.89 | 1.91 | 1.46 |
| orf19.556    |        | 1.39 | 0.67 | 1.49 |
| orf19.5602   | BMT6   | 1.89 | 0.71 | 1.68 |
| orf19.5629   | QCR7   | 1.58 | 1.39 | 1.71 |
| orf19.5636   | RBT5   | 1.26 | 0.30 | 0.79 |
| orf19.5641   | CAR2   | 2.14 | 0.96 | 1.32 |

|              |       |      |      |      |
|--------------|-------|------|------|------|
| orf19.5648   |       | 1.61 | 1.01 | 1.38 |
| orf19.5653   | ATP2  | 2.27 | 1.36 | 1.71 |
| orf19.5654   |       | 1.99 | 1.05 | 1.68 |
| orf19.566    |       | 1.49 | 1.15 | 0.94 |
| orf19.5660.1 |       | 2.06 | 0.88 | 1.91 |
| orf19.5666   |       | 2.11 | 2.11 | 2.04 |
| orf19.5671   |       | 1.83 | 1.47 | 1.79 |
| orf19.5674   | PGA10 | 0.28 | 0.51 | 0.41 |
| orf19.5676   |       | 1.80 | 1.63 | 1.35 |
| orf19.5683   |       | 2.21 | 2.41 | 1.70 |
| orf19.5688   |       | 1.85 | 1.54 | 1.76 |
| orf19.5689   |       | 1.51 | 1.20 | 1.47 |
| orf19.5700   | TLO11 | 2.15 | 1.54 | 1.71 |
| orf19.5733   |       | 0.47 | 1.08 | 0.39 |
| orf19.5741   | ALS1  | 0.45 | 2.45 | 0.35 |
| orf19.575    | HYR3  | 1.95 | 1.33 | 1.33 |
| orf19.5754   |       | 1.18 | 1.96 | 0.80 |
| orf19.5758   | SAL6  | 0.81 | 1.98 | 0.78 |
| orf19.5769   |       | 1.90 | 2.19 | 1.57 |
| orf19.577    |       | 1.95 | 1.20 | 1.46 |
| orf19.5772   |       | 2.16 | 1.16 | 2.15 |
| orf19.5776   | TOM1  | 1.59 | 1.70 | 1.12 |
| orf19.579    | FOL1  | 2.28 | 2.10 | 1.85 |
| orf19.5793   | PR26  | 1.67 | 1.35 | 1.15 |
| orf19.5811   | MET1  | 2.44 | 1.76 | 1.73 |
| orf19.5823   | SGT2  | 1.96 | 1.20 | 1.52 |
| orf19.5846   |       | 1.31 | 2.25 | 1.25 |
| orf19.5849   | CWT1  | 1.97 | 1.57 | 1.72 |
| orf19.5884   |       | 1.18 | 0.43 | 0.67 |
| orf19.5885   |       | 0.88 | 0.74 | 0.77 |
| orf19.589    |       | 1.56 | 1.51 | 1.16 |
| orf19.5890   |       | 1.62 | 2.15 | 1.63 |
| orf19.59     | REI1  | 0.34 | 0.97 | 0.26 |
| orf19.590    |       | 1.92 | 2.06 | 2.33 |
| orf19.5901   | PKC1  | 1.91 | 1.23 | 1.83 |
| orf19.5908   | TEC1  | 0.63 | 0.53 | 0.41 |
| orf19.5912   | MAK21 | 0.79 | 0.70 | 0.55 |
| orf19.592    |       | 2.40 | 1.27 | 2.14 |
| orf19.5920   |       | 2.29 | 1.20 | 1.56 |
| orf19.593    | FGR32 | 1.72 | 1.29 | 1.53 |
| orf19.5941   |       | 2.18 | 0.93 | 1.57 |
| orf19.5949   | FAS2  | 0.61 | 0.42 | 0.52 |
| orf19.5951   |       | 0.60 | 0.36 | 0.45 |
| orf19.5953   |       | 2.17 | 1.15 | 1.20 |
| orf19.5960   |       | 1.81 | 0.64 | 1.27 |
| orf19.5965   |       | 2.35 | 2.08 | 1.79 |
| orf19.5968   | RDI1  | 1.76 | 1.07 | 1.40 |
| orf19.5989   |       | 1.23 | 1.36 | 0.94 |
| orf19.5999   | DYN1  | 1.77 | 1.17 | 1.15 |
| orf19.6007   |       | 1.21 | 0.28 | 0.67 |
| orf19.6010   | CDC5  | 0.88 | 0.26 | 0.71 |
| orf19.6026   | ERG2  | 1.20 | 0.48 | 1.23 |
| orf19.6028   | HGC1  | 2.27 | 1.49 | 1.39 |
| orf19.6034   | TUB2  | 1.70 | 0.56 | 1.66 |
| orf19.6040   | SNF7  | 1.78 | 2.47 | 1.91 |
| orf19.6045   |       | 1.73 | 1.26 | 2.00 |
| orf19.6058   | GLO1  | 1.75 | 2.49 | 1.56 |
| orf19.6062   |       | 1.52 | 0.94 | 1.35 |
| orf19.6066   |       | 2.25 | 0.71 | 1.25 |
| orf19.6070   | ENA2  | 1.73 | 0.55 | 1.09 |
| orf19.6073   | HMX1  | 0.93 | 0.30 | 0.49 |
| orf19.6078.1 |       | 1.86 | 1.38 | 1.48 |
| orf19.6082   |       | 1.76 | 1.38 | 1.44 |
| orf19.6092   | KEL1  | 1.56 | 1.01 | 1.59 |
| orf19.6094   |       | 1.84 | 1.11 | 1.16 |
| orf19.6109   | TUP1  | 1.55 | 0.80 | 1.15 |
| orf19.6132   |       | 2.02 | 1.19 | 2.14 |

|              |       |      |      |      |
|--------------|-------|------|------|------|
| orf19.6135.1 | SMX4  | 1.19 | 1.31 | 1.47 |
| orf19.6151   | ARC15 | 1.60 | 1.14 | 1.36 |
| orf19.6153   |       | 2.38 | 2.23 | 1.95 |
| orf19.6155   |       | 2.00 | 1.51 | 2.05 |
| orf19.6163   | CSE4  | 2.42 | 0.86 | 1.48 |
| orf19.6165   | KGD1  | 2.09 | 1.37 | 1.19 |
| orf19.6167   | AYR1  | 2.33 | 0.90 | 1.83 |
| orf19.6169.2 |       | 2.32 | 1.05 | 1.68 |
| orf19.6176   | SEC61 | 2.17 | 0.78 | 1.93 |
| orf19.6197   |       | 1.83 | 1.55 | 1.50 |
| orf19.6202   | RBT4  | 0.76 | 0.13 | 0.70 |
| orf19.6245   |       | 2.04 | 2.25 | 1.03 |
| orf19.6250   |       | 1.85 | 1.24 | 1.43 |
| orf19.6252   |       | 1.94 | 1.82 | 1.33 |
| orf19.6263   |       | 1.20 | 1.19 | 1.34 |
| orf19.6264.3 |       | 2.19 | 0.73 | 1.44 |
| orf19.6268   |       | 1.99 | 1.21 | 1.22 |
| orf19.6272   |       | 2.34 | 1.73 | 1.63 |
| orf19.6305   |       | 2.00 | 1.25 | 1.41 |
| orf19.6309   |       | 1.86 | 1.55 | 1.11 |
| orf19.631    |       | 2.17 | 1.66 | 1.87 |
| orf19.6321   | PGA48 | 1.20 | 0.72 | 1.33 |
| orf19.6324   | VID27 | 2.40 | 1.17 | 1.88 |
| orf19.6326   |       | 1.58 | 0.45 | 0.93 |
| orf19.6365   | PTP1  | 0.61 | 0.53 | 0.60 |
| orf19.6373   |       | 1.62 | 1.43 | 1.17 |
| orf19.6374   |       | 2.04 | 1.14 | 1.48 |
| orf19.6377   |       | 1.56 | 1.20 | 1.51 |
| orf19.6400   |       | 1.76 | 1.80 | 1.33 |
| orf19.6402   | CYS3  | 0.77 | 2.14 | 0.49 |
| orf19.6415.1 |       | 0.97 | 0.51 | 0.86 |
| orf19.6435   |       | 2.43 | 1.25 | 1.95 |
| orf19.645.1  |       | 2.49 | 1.38 | 1.97 |
| orf19.646    | GLN1  | 1.01 | 0.19 | 0.85 |
| orf19.6461   |       | 1.59 | 1.07 | 1.02 |
| orf19.6470   | AHP2  | 2.39 | 1.60 | 1.79 |
| orf19.6472   | CYP1  | 1.31 | 0.77 | 1.12 |
| orf19.6478   | YCF1  | 1.23 | 2.40 | 1.04 |
| orf19.649    |       | 1.84 | 1.00 | 1.12 |
| orf19.6494   | WHI3  | 1.59 | 1.00 | 1.66 |
| orf19.6534.2 |       | 1.95 | 1.41 | 1.59 |
| orf19.6538   | VMA11 | 2.31 | 0.68 | 1.70 |
| orf19.6544   | LPI9  | 1.84 | 1.94 | 1.58 |
| orf19.655    | PHO84 | 0.51 | 0.10 | 1.23 |
| orf19.6552   |       | 1.99 | 0.97 | 1.93 |
| orf19.6553   |       | 1.55 | 0.88 | 1.28 |
| orf19.6561   | LAT1  | 1.34 | 0.90 | 0.94 |
| orf19.657    | SAM2  | 0.96 | 0.51 | 0.80 |
| orf19.6588   |       | 1.66 | 1.14 | 1.21 |
| orf19.6596   |       | 1.10 | 1.67 | 0.92 |
| orf19.6601.1 | YKE2  | 1.82 | 0.87 | 1.16 |
| orf19.6607   |       | 1.37 | 0.82 | 0.98 |
| orf19.6634   | VMA2  | 1.73 | 0.88 | 1.47 |
| orf19.6642   |       | 2.16 | 1.14 | 1.40 |
| orf19.6659   | GAP6  | 1.20 | 2.50 | 0.50 |
| orf19.6673   | HEX1  | 1.21 | 0.67 | 0.98 |
| orf19.6710   |       | 0.77 | 0.92 | 0.59 |
| orf19.6720   |       | 1.63 | 1.17 | 1.21 |
| orf19.6736   |       | 0.59 | 0.67 | 0.51 |
| orf19.6745   | TPI1  | 0.82 | 0.97 | 0.81 |
| orf19.6747   |       | 2.15 | 2.13 | 1.51 |
| orf19.6753   |       | 1.79 | 2.09 | 1.47 |
| orf19.676    |       | 2.48 | 0.60 | 1.77 |
| orf19.6787   |       | 1.34 | 0.29 | 1.27 |
| orf19.6798   | SSN6  | 2.12 | 1.26 | 1.14 |
| orf19.6809   |       | 1.75 | 1.97 | 1.11 |
| orf19.6810   |       | 2.03 | 1.25 | 1.52 |

|              |       |      |      |      |
|--------------|-------|------|------|------|
| orf19.6817   | FCR1  | 1.31 | 2.33 | 1.24 |
| orf19.6835   |       | 2.50 | 0.85 | 1.84 |
| orf19.6837   |       | 1.70 | 2.43 | 1.74 |
| orf19.6843   |       | 1.90 | 1.11 | 1.26 |
| orf19.6863   | VPH1  | 1.74 | 0.99 | 1.22 |
| orf19.6867   |       | 1.82 | 0.99 | 1.61 |
| orf19.6874   |       | 0.65 | 0.41 | 0.75 |
| orf19.6880   |       | 2.00 | 1.42 | 1.24 |
| orf19.6883   |       | 1.99 | 1.57 | 1.20 |
| orf19.6887   |       | 1.67 | 0.81 | 1.43 |
| orf19.6902   |       | 0.67 | 1.11 | 0.50 |
| orf19.6906   | ASC1  | 1.22 | 0.50 | 0.94 |
| orf19.6915   | MRE11 | 1.96 | 1.86 | 2.20 |
| orf19.6924   | HTA1  | 1.03 | 0.43 | 1.13 |
| orf19.6927   | PEP8  | 1.91 | 2.05 | 1.40 |
| orf19.6928   | SAP9  | 1.36 | 2.29 | 1.22 |
| orf19.6933   |       | 1.84 | 2.07 | 1.96 |
| orf19.6944   | PHB1  | 1.83 | 0.87 | 1.12 |
| orf19.6948   | CCC1  | 2.22 | 2.29 | 1.61 |
| orf19.6953   | IRS4  | 1.71 | 1.93 | 1.54 |
| orf19.6968   |       | 1.03 | 0.32 | 0.71 |
| orf19.6979   |       | 1.99 | 1.22 | 1.41 |
| orf19.6987   | DNM1  | 2.01 | 1.57 | 1.45 |
| orf19.6991   | PRE3  | 2.21 | 1.92 | 2.02 |
| orf19.7030   | SSR1  | 1.64 | 1.04 | 1.40 |
| orf19.7035   |       | 2.26 | 1.21 | 2.03 |
| orf19.7048   |       | 1.32 | 0.87 | 1.34 |
| orf19.7050   | NOP15 | 0.81 | 0.68 | 0.66 |
| orf19.7058   |       | 1.64 | 1.10 | 1.68 |
| orf19.706    | NMD3  | 0.65 | 1.41 | 0.48 |
| orf19.7086   |       | 1.38 | 1.35 | 1.45 |
| orf19.709    | PUP2  | 1.85 | 1.50 | 1.25 |
| orf19.7092   |       | 1.92 | 1.65 | 1.42 |
| orf19.7095   |       | 2.25 | 1.25 | 1.73 |
| orf19.71     |       | 2.02 | 1.50 | 1.66 |
| orf19.7100   |       | 2.37 | 1.20 | 1.57 |
| orf19.7109   |       | 1.29 | 0.88 | 1.38 |
| orf19.7115   | SAC7  | 1.90 | 0.80 | 1.35 |
| orf19.7116   |       | 1.90 | 1.23 | 1.33 |
| orf19.7118   |       | 1.80 | 1.78 | 1.92 |
| orf19.7119   |       | 1.85 | 1.17 | 1.31 |
| orf19.7124   |       | 1.99 | 1.17 | 1.35 |
| orf19.7127   | TLO16 | 1.95 | 1.80 | 2.14 |
| orf19.7144   |       | 1.78 | 1.46 | 1.23 |
| orf19.7161   | SUI3  | 1.64 | 1.39 | 1.33 |
| orf19.717    | HSP60 | 1.54 | 0.55 | 0.95 |
| orf19.7186   | CLB4  | 1.78 | 0.94 | 2.14 |
| orf19.7196   |       | 2.42 | 0.91 | 1.68 |
| orf19.7201   | SLA2  | 1.93 | 1.35 | 1.17 |
| orf19.7214   |       | 2.21 | 1.12 | 1.46 |
| orf19.7215   |       | 0.65 | 0.85 | 0.55 |
| orf19.7215.3 |       | 1.47 | 0.79 | 1.37 |
| orf19.7218   | RBE1  | 0.76 | 0.15 | 1.12 |
| orf19.7222   |       | 1.62 | 1.61 | 1.16 |
| orf19.7234   |       | 1.62 | 0.95 | 1.32 |
| orf19.7239   |       | 1.84 | 1.11 | 1.47 |
| orf19.7261   |       | 2.27 | 1.20 | 1.82 |
| orf19.7263   |       | 1.78 | 1.05 | 1.21 |
| orf19.7265   |       | 1.79 | 1.42 | 1.48 |
| orf19.7290   |       | 1.92 | 1.01 | 1.41 |
| orf19.7292   | ARP2  | 2.03 | 1.35 | 1.57 |
| orf19.7307   |       | 1.00 | 0.38 | 0.78 |
| orf19.7328   |       | 1.92 | 1.53 | 1.51 |
| orf19.7362   | SKN1  | 0.91 | 0.34 | 0.73 |
| orf19.7382   | CAM1  | 1.06 | 0.57 | 0.94 |
| orf19.7398   |       | 0.71 | 0.84 | 0.54 |
| orf19.7402   |       | 1.26 | 0.63 | 1.68 |

|             |       |      |      |      |
|-------------|-------|------|------|------|
| orf19.7424  | NSA2  | 0.60 | 0.85 | 0.58 |
| orf19.7428  | APN1  | 1.59 | 1.48 | 1.74 |
| orf19.745   | VAC8  | 1.64 | 1.28 | 1.75 |
| orf19.7458  |       | 1.50 | 1.83 | 1.56 |
| orf19.7459  |       | 0.51 | 0.83 | 1.01 |
| orf19.7499  |       | 1.70 | 1.01 | 1.16 |
| orf19.7501  |       | 1.59 | 1.96 | 1.13 |
| orf19.7510  | KIN2  | 1.69 | 1.34 | 1.14 |
| orf19.7522  |       | 2.10 | 0.96 | 1.39 |
| orf19.7529  | EPL1  | 2.07 | 1.81 | 1.34 |
| orf19.758   |       | 2.29 | 0.89 | 1.66 |
| orf19.759   |       | 1.85 | 1.24 | 1.53 |
| orf19.7597  | PGA12 | 1.63 | 1.24 | 1.53 |
| orf19.7600  | FDH3  | 0.98 | 2.19 | 0.77 |
| orf19.7603  |       | 1.35 | 1.52 | 1.44 |
| orf19.7605  | PUP1  | 1.75 | 2.13 | 1.48 |
| orf19.7610  | PTP3  | 1.14 | 2.28 | 0.88 |
| orf19.7612  | CTM1  | 1.07 | 2.36 | 1.07 |
| orf19.7635  | DRS1  | 0.87 | 0.87 | 0.61 |
| orf19.7644  |       | 2.17 | 1.45 | 2.07 |
| orf19.7645  |       | 2.08 | 0.59 | 1.49 |
| orf19.7654  | CPR6  | 2.20 | 1.34 | 1.90 |
| orf19.7667  | IAH1  | 1.97 | 1.25 | 1.37 |
| orf19.767   | ERG3  | 0.53 | 0.37 | 0.65 |
| orf19.784   |       | 1.54 | 0.97 | 1.78 |
| orf19.792   |       | 1.54 | 1.26 | 1.07 |
| orf19.835   |       | 1.73 | 2.05 | 1.36 |
| orf19.836.1 |       | 1.23 | 1.05 | 1.46 |
| orf19.837   | GNA1  | 1.42 | 1.20 | 1.37 |
| orf19.841   |       | 2.26 | 1.07 | 1.73 |
| orf19.843   |       | 1.61 | 1.22 | 1.72 |
| orf19.875   |       | 1.27 | 1.13 | 1.21 |
| orf19.903   | GPM1  | 0.59 | 0.75 | 0.70 |
| orf19.905   | AVT7  | 2.09 | 1.00 | 1.90 |
| orf19.911   |       | 1.40 | 1.71 | 1.06 |
| orf19.916   |       | 2.08 | 1.03 | 1.38 |
| orf19.921   |       | 2.36 | 1.56 | 1.45 |
| orf19.925   |       | 2.48 | 0.87 | 1.51 |
| orf19.929   |       | 1.50 | 0.88 | 1.07 |
| orf19.94    |       | 1.99 | 1.19 | 1.57 |
| orf19.942   | KRE62 | 2.02 | 0.98 | 1.63 |
| orf19.945   | VPS2  | 2.41 | 1.75 | 1.27 |
| orf19.954   |       | 1.42 | 1.05 | 1.19 |
| orf19.979   | FAS1  | 0.48 | 0.38 | 0.40 |
| orf19.986   | GLY1  | 0.52 | 2.24 | 0.52 |
| orf19.997   |       | 1.97 | 1.28 | 1.56 |
| CaalfMp01   | COX2  | 1.47 | 1.08 | 1.61 |
| CaalfMp03   | NAD1  | 2.14 | 0.91 | 1.71 |
| CaalfMp05   | ATP9  | 1.11 | 0.67 | 1.06 |
| CaalfMp06   | ATP6  | 1.81 | 0.90 | 1.42 |
| CaalfMp09   | NAD2  | 1.20 | 0.86 | 1.02 |
| CaalfMp10   | NAD3  | 1.32 | 0.84 | 1.15 |
| CaalfMp12   | NAD4L | 1.79 | 0.84 | 1.27 |
| CaalfMp13   | NAD5  | 1.99 | 1.23 | 1.87 |
| CaalfMp14   | NAD4  | 1.34 | 0.76 | 1.64 |
| CaalfMr17   | RRNS  | 1.76 | 1.03 | 1.70 |
| CaalfMt18   | TRNA  | 1.31 | 0.78 | 1.50 |
| CaalfMt22   | TRNY1 | 2.39 | 0.65 | 1.57 |
| CaalfMt23   | TRNH1 | 1.56 | 0.54 | 1.22 |
| CaalfMt24   | TRNT1 | 6.62 | 0.85 | 4.64 |
| CaalfMt32   | TRNW  | 3.26 | 1.72 | 3.41 |
| CaalfMt33   | TRNF  | 1.84 | 1.12 | 1.59 |
| CaalfMt35   | TRNM1 | 1.48 | 0.94 | 1.43 |
| CaalfMt38   | TRNS1 | 1.80 | 0.84 | 1.57 |
| CaalfMt40   | TRNL2 | 1.67 | 0.90 | 1.42 |
| CaalfMt44   | TRNH2 | 4.17 | 1.59 | 3.72 |



|              |        |      |      |      |
|--------------|--------|------|------|------|
| CaalfMt47    | TRNK2  | 5.08 | 1.40 | 2.92 |
| orf19.1016   |        | 1.00 | 0.90 | 0.90 |
| orf19.1018   |        | 1.71 | 1.02 | 1.30 |
| orf19.1030   |        | 1.28 | 0.97 | 0.94 |
| orf19.1031   | HMG1   | 1.15 | 0.48 | 0.97 |
| orf19.1033   | STR2   | 1.45 | 1.50 | 1.01 |
| orf19.1034   |        | 0.77 | 1.86 | 1.13 |
| orf19.1047   | ERB1   | 0.96 | 1.05 | 0.95 |
| orf19.1048   | IFD6   | 2.68 | 1.50 | 1.79 |
| orf19.105    | HAL22  | 2.13 | 2.04 | 1.68 |
| orf19.1053   |        | 1.44 | 0.72 | 1.06 |
| orf19.1055   | CDC3   | 1.79 | 0.76 | 1.64 |
| orf19.1058   |        | 2.23 | 2.65 | 1.62 |
| orf19.1063   |        | 1.32 | 1.35 | 1.75 |
| orf19.1067   | GPM2   | 0.98 | 3.17 | 1.06 |
| orf19.107    |        | 0.72 | 0.91 | 0.77 |
| orf19.109    |        | 2.02 | 1.30 | 1.83 |
| orf19.1091   |        | 0.55 | 1.12 | 0.59 |
| orf19.1093   | FLO8   | 1.22 | 0.48 | 1.21 |
| orf19.1095   |        | 1.43 | 0.98 | 0.93 |
| orf19.1097   | ALS2   | 0.62 | 0.94 | 0.56 |
| orf19.1101   |        | 1.69 | 1.41 | 1.31 |
| orf19.1107   |        | 2.16 | 1.29 | 1.75 |
| orf19.1108   | HAM1   | 1.21 | 1.38 | 0.81 |
| orf19.1109   |        | 1.12 | 0.76 | 0.93 |
| orf19.1112   | BUD7   | 1.65 | 0.93 | 1.16 |
| orf19.1114   |        | 1.79 | 0.87 | 1.17 |
| orf19.1124.2 |        | 1.09 | 0.73 | 0.79 |
| orf19.1133   | MSB1   | 1.46 | 0.69 | 1.12 |
| orf19.1137   |        | 2.46 | 2.75 | 1.18 |
| orf19.1139   |        | 1.12 | 0.84 | 0.72 |
| orf19.1144   |        | 1.58 | 0.88 | 1.20 |
| orf19.1150   |        | 2.17 | 1.55 | 2.24 |
| orf19.1151   |        | 1.34 | 1.01 | 1.28 |
| orf19.1152   |        | 1.48 | 0.87 | 1.21 |
| orf19.1154   | EGD1   | 1.39 | 0.83 | 1.25 |
| orf19.1160   |        | 1.89 | 1.13 | 2.05 |
| orf19.1161   | PLD1   | 1.44 | 0.96 | 0.90 |
| orf19.1164   | GAR1   | 1.12 | 0.92 | 0.90 |
| orf19.1166   | CTA3   | 1.60 | 1.12 | 1.37 |
| orf19.117    |        | 2.64 | 2.80 | 1.17 |
| orf19.1170   | ARO7   | 1.72 | 0.64 | 1.23 |
| orf19.1174   |        | 0.69 | 0.80 | 0.55 |
| orf19.1177   |        | 1.70 | 0.99 | 1.59 |
| orf19.1183   |        | 2.12 | 1.18 | 1.23 |
| orf19.1185   |        | 1.48 | 0.97 | 1.18 |
| orf19.1193   | GNP1   | 0.96 | 1.10 | 0.68 |
| orf19.1195   |        | 1.50 | 0.85 | 1.17 |
| orf19.1199   | NOP5   | 0.85 | 0.74 | 0.67 |
| orf19.1200   |        | 1.76 | 1.73 | 1.87 |
| orf19.1204   |        | 2.05 | 0.96 | 1.36 |
| orf19.1206   | FET35  | 0.68 | 0.43 | 0.62 |
| orf19.1214   |        | 1.15 | 1.38 | 0.77 |
| orf19.1217   |        | 1.16 | 0.85 | 0.81 |
| orf19.1219   |        | 1.51 | 1.41 | 1.61 |
| orf19.122    | CDC20  | 1.40 | 0.60 | 1.01 |
| orf19.1220   | RVS167 | 1.63 | 1.14 | 1.17 |
| orf19.1222   |        | 1.25 | 0.76 | 1.28 |
| orf19.1226   |        | 1.20 | 1.34 | 1.04 |
| orf19.1230   |        | 1.01 | 0.86 | 0.62 |
| orf19.1231   |        | 1.13 | 1.31 | 1.01 |
| orf19.1233   | ADE4   | 1.04 | 0.66 | 0.61 |
| orf19.1235   | HOM3   | 0.80 | 3.96 | 1.04 |
| orf19.1248   |        | 1.70 | 1.09 | 1.47 |
| orf19.1249   |        | 2.41 | 1.42 | 1.49 |
| orf19.1250   |        | 1.09 | 1.07 | 1.09 |
| orf19.1252   | YME1   | 1.43 | 2.19 | 1.09 |

|              |        |      |      |      |
|--------------|--------|------|------|------|
| orf19.1257   |        | 1.25 | 1.19 | 0.96 |
| orf19.1259   |        | 1.45 | 1.33 | 1.19 |
| orf19.1267.1 |        | 1.70 | 2.26 | 1.33 |
| orf19.1281   |        | 1.41 | 0.55 | 1.28 |
| orf19.1283   | MEC1   | 1.68 | 1.07 | 1.69 |
| orf19.1287   |        | 0.91 | 0.78 | 0.99 |
| orf19.1289   | SCT1   | 1.19 | 0.95 | 1.28 |
| orf19.1295   | VAS1   | 1.47 | 1.10 | 1.16 |
| orf19.13     |        | 1.01 | 1.27 | 1.14 |
| orf19.1306   |        | 0.93 | 0.53 | 1.01 |
| orf19.131.2  |        | 1.20 | 0.54 | 1.61 |
| orf19.132    |        | 1.81 | 4.05 | 1.51 |
| orf19.1321   | HWP1   | 1.81 | 1.12 | 1.14 |
| orf19.1333   | SNG3   | 1.36 | 1.23 | 1.06 |
| orf19.1335   |        | 0.74 | 0.58 | 0.61 |
| orf19.1336   | PUP3   | 1.43 | 1.46 | 1.39 |
| orf19.1339   | CPY1   | 1.68 | 1.11 | 1.49 |
| orf19.1342   | SHM1   | 1.20 | 0.69 | 0.89 |
| orf19.1343   |        | 1.62 | 0.75 | 1.21 |
| orf19.1353   |        | 0.08 | 1.48 | 0.23 |
| orf19.1354   | UCF1   | 0.06 | 2.28 | 0.14 |
| orf19.1355   |        | 1.49 | 0.96 | 1.26 |
| orf19.1358   | GCN4   | 0.99 | 1.42 | 0.88 |
| orf19.1361   |        | 1.14 | 0.84 | 0.97 |
| orf19.1372   |        | 1.52 | 0.72 | 1.48 |
| orf19.1378   | SUP35  | 1.02 | 0.89 | 0.85 |
| orf19.1386   |        | 1.59 | 1.06 | 1.32 |
| orf19.1387   |        | 2.03 | 2.00 | 1.87 |
| orf19.1388   |        | 0.50 | 0.91 | 0.58 |
| orf19.1395   |        | 1.51 | 0.94 | 1.38 |
| orf19.14     |        | 1.26 | 1.10 | 1.27 |
| orf19.1402   |        | 1.59 | 1.08 | 1.28 |
| orf19.1403   |        | 1.26 | 0.93 | 0.81 |
| orf19.1407   |        | 0.89 | 1.71 | 1.41 |
| orf19.1413   | YFH1   | 1.88 | 0.81 | 1.52 |
| orf19.1414   |        | 1.67 | 0.96 | 1.34 |
| orf19.1435   | TEF1   | 1.07 | 0.72 | 1.17 |
| orf19.1444   |        | 2.62 | 1.81 | 1.48 |
| orf19.1446   | CLB2   | 1.70 | 0.63 | 1.48 |
| orf19.1448   | APT1   | 1.06 | 0.59 | 0.98 |
| orf19.146    |        | 1.57 | 1.91 | 1.87 |
| orf19.1460   |        | 1.33 | 1.63 | 1.13 |
| orf19.1466   |        | 1.15 | 1.02 | 1.76 |
| orf19.1470   | RPS26A | 1.07 | 0.74 | 1.08 |
| orf19.1479   |        | 1.46 | 1.64 | 1.32 |
| orf19.1480   |        | 1.81 | 0.84 | 1.37 |
| orf19.1490   | MSB2   | 1.40 | 0.69 | 1.17 |
| orf19.1494   | RAD23  | 1.26 | 0.94 | 1.01 |
| orf19.150    |        | 0.90 | 0.95 | 0.77 |
| orf19.1500   |        | 2.98 | 1.33 | 1.88 |
| orf19.1505   |        | 4.40 | 1.33 | 1.78 |
| orf19.1509   | ROD1   | 1.32 | 1.70 | 0.90 |
| orf19.1526   | SNF2   | 1.33 | 0.87 | 1.23 |
| orf19.1528   |        | 0.80 | 1.10 | 0.84 |
| orf19.153    |        | 1.63 | 1.36 | 1.14 |
| orf19.1532   |        | 1.18 | 1.38 | 1.41 |
| orf19.1533   |        | 1.25 | 0.82 | 1.51 |
| orf19.1536   |        | 1.79 | 0.82 | 1.32 |
| orf19.1537   |        | 1.22 | 0.65 | 0.93 |
| orf19.154    |        | 0.59 | 1.36 | 0.58 |
| orf19.1545   |        | 0.87 | 1.10 | 1.08 |
| orf19.1546   |        | 1.05 | 0.74 | 0.86 |
| orf19.1549   |        | 1.89 | 1.28 | 1.72 |
| orf19.155    | URE2   | 1.57 | 1.25 | 0.90 |
| orf19.1563   | ECM3   | 1.61 | 1.31 | 1.51 |
| orf19.1565   |        | 1.06 | 0.71 | 0.63 |
| orf19.1566   |        | 0.76 | 0.64 | 0.56 |

|              |       |      |      |      |
|--------------|-------|------|------|------|
| orf19.1569   | UTP22 | 0.83 | 0.72 | 0.54 |
| orf19.157    |       | 1.49 | 0.96 | 1.17 |
| orf19.1573   |       | 1.48 | 1.00 | 1.68 |
| orf19.1574   |       | 1.15 | 0.87 | 0.85 |
| orf19.1575   | PRS1  | 0.68 | 0.78 | 0.63 |
| orf19.1578   |       | 0.78 | 0.80 | 0.51 |
| orf19.158    |       | 0.72 | 0.82 | 0.65 |
| orf19.1585   | ZRT2  | 1.54 | 0.55 | 2.84 |
| orf19.1586   | FGR22 | 1.97 | 2.75 | 2.00 |
| orf19.1588   |       | 2.57 | 2.08 | 1.68 |
| orf19.1591   | ERG10 | 1.18 | 0.61 | 0.80 |
| orf19.1592   |       | 3.27 | 2.14 | 1.85 |
| orf19.1598   | ERG24 | 1.63 | 0.63 | 1.27 |
| orf19.1601   | RPL3  | 1.09 | 0.67 | 0.93 |
| orf19.1604   |       | 0.93 | 0.85 | 0.81 |
| orf19.1607   | ALR1  | 0.54 | 1.03 | 0.55 |
| orf19.1613   | ILV2  | 1.03 | 1.58 | 0.85 |
| orf19.1624   |       | 2.01 | 1.34 | 1.38 |
| orf19.1626   |       | 0.99 | 1.13 | 0.91 |
| orf19.163    |       | 1.02 | 0.96 | 1.09 |
| orf19.1633   |       | 0.78 | 0.75 | 0.54 |
| orf19.1635   | RPL12 | 1.44 | 0.74 | 1.12 |
| orf19.1637   |       | 2.48 | 1.10 | 3.14 |
| orf19.1646   |       | 0.82 | 0.97 | 0.68 |
| orf19.1650   |       | 1.06 | 0.69 | 1.16 |
| orf19.1661   |       | 1.52 | 1.00 | 1.26 |
| orf19.1662   |       | 1.25 | 1.27 | 1.04 |
| orf19.1669   | AFG3  | 2.11 | 1.36 | 1.39 |
| orf19.1671   | UTR2  | 1.72 | 0.78 | 1.28 |
| orf19.1672   |       | 1.80 | 1.31 | 1.36 |
| orf19.1673   | PPT1  | 0.99 | 0.60 | 0.81 |
| orf19.1675   |       | 2.01 | 0.69 | 1.19 |
| orf19.1677   |       | 1.31 | 0.87 | 1.02 |
| orf19.1678   |       | 1.11 | 0.74 | 0.97 |
| orf19.168    |       | 0.78 | 1.10 | 0.90 |
| orf19.1687   |       | 0.56 | 1.07 | 0.61 |
| orf19.1691   |       | 0.26 | 0.13 | 0.72 |
| orf19.1693   | CAS4  | 2.20 | 0.81 | 1.58 |
| orf19.1694   |       | 1.84 | 0.90 | 1.64 |
| orf19.1697   |       | 1.17 | 1.26 | 1.04 |
| orf19.170    |       | 0.51 | 0.69 | 0.46 |
| orf19.1706   | MET18 | 1.60 | 1.11 | 1.19 |
| orf19.1707   |       | 1.17 | 0.95 | 0.89 |
| orf19.1708   |       | 1.18 | 1.30 | 1.19 |
| orf19.171    | DBP2  | 0.53 | 0.76 | 0.43 |
| orf19.1730   |       | 2.01 | 1.98 | 2.17 |
| orf19.1732   |       | 0.69 | 1.06 | 0.79 |
| orf19.1733   |       | 1.68 | 0.89 | 1.37 |
| orf19.1734   |       | 1.61 | 2.53 | 0.99 |
| orf19.1738.1 |       | 1.30 | 0.90 | 1.50 |
| orf19.1744   | HEM4  | 1.79 | 1.39 | 2.33 |
| orf19.1751   | SPT23 | 1.06 | 1.14 | 0.91 |
| orf19.1753   | PUS7  | 0.80 | 1.09 | 0.60 |
| orf19.1760   | RAS1  | 1.61 | 1.36 | 1.43 |
| orf19.1770   | CYC1  | 1.84 | 0.80 | 1.66 |
| orf19.1772   |       | 0.58 | 0.93 | 0.80 |
| orf19.1777   |       | 2.08 | 1.73 | 1.49 |
| orf19.1783   | YOR1  | 1.16 | 1.88 | 1.06 |
| orf19.1785   |       | 2.98 | 2.74 | 2.40 |
| orf19.1786   |       | 1.32 | 0.88 | 1.11 |
| orf19.1787   |       | 1.21 | 1.11 | 1.10 |
| orf19.1788   |       | 1.53 | 1.27 | 0.92 |
| orf19.1791   |       | 0.70 | 1.12 | 0.58 |
| orf19.1799   |       | 0.94 | 1.28 | 0.84 |
| orf19.1802   |       | 0.72 | 1.43 | 0.80 |
| orf19.1804   |       | 1.59 | 1.47 | 1.23 |
| orf19.1806   |       | 1.44 | 0.63 | 1.44 |

|              |       |      |      |      |
|--------------|-------|------|------|------|
| orf19.1815   |       | 0.86 | 0.87 | 0.66 |
| orf19.1832   | FCY23 | 2.09 | 0.82 | 1.08 |
| orf19.1833   |       | 1.11 | 0.95 | 0.81 |
| orf19.1835   |       | 1.37 | 1.16 | 1.67 |
| orf19.1837   | TBP1  | 1.31 | 0.79 | 1.10 |
| orf19.1847   | ARO10 | 3.67 | 1.04 | 1.76 |
| orf19.185    |       | 1.23 | 1.22 | 1.12 |
| orf19.1857   |       | 1.45 | 0.98 | 1.16 |
| orf19.1860   | LSC2  | 2.04 | 1.08 | 1.73 |
| orf19.1860.1 |       | 1.99 | 0.98 | 1.69 |
| orf19.1862   |       | 2.10 | 6.12 | 1.68 |
| orf19.1864   |       | 1.73 | 1.78 | 1.32 |
| orf19.1871   |       | 1.50 | 1.38 | 1.33 |
| orf19.1880   | HEM15 | 1.35 | 2.53 | 1.31 |
| orf19.1889   |       | 1.12 | 1.18 | 1.26 |
| orf19.1896   | SSC1  | 1.32 | 0.83 | 0.91 |
| orf19.1901   |       | 1.07 | 0.80 | 1.05 |
| orf19.1907   | EMC9  | 1.56 | 0.86 | 0.91 |
| orf19.1910   |       | 2.52 | 1.13 | 1.87 |
| orf19.1911   | PGA52 | 1.18 | 0.81 | 1.11 |
| orf19.1913   |       | 1.33 | 0.96 | 1.22 |
| orf19.1915   | MPP10 | 0.91 | 0.94 | 0.86 |
| orf19.1923   | RRN3  | 0.73 | 0.92 | 0.82 |
| orf19.1925   | TLO5  | 1.79 | 1.20 | 1.44 |
| orf19.1942   | SGE1  | 4.89 | 3.08 | 2.30 |
| orf19.1944   | GPR1  | 0.99 | 1.06 | 1.09 |
| orf19.1952   |       | 1.54 | 1.78 | 1.26 |
| orf19.1953   |       | 1.23 | 1.22 | 1.67 |
| orf19.1956   |       | 1.03 | 0.70 | 0.81 |
| orf19.1957   | CYC3  | 0.89 | 1.06 | 0.53 |
| orf19.1959   |       | 1.47 | 1.09 | 1.03 |
| orf19.1961   |       | 1.47 | 0.93 | 0.93 |
| orf19.1963   |       | 1.36 | 0.94 | 1.01 |
| orf19.1966   | BUD23 | 0.87 | 0.69 | 0.69 |
| orf19.1967   |       | 1.16 | 0.69 | 0.95 |
| orf19.1970   |       | 2.04 | 1.05 | 1.62 |
| orf19.1972   |       | 1.75 | 0.99 | 1.24 |
| orf19.1974   | TFS1  | 2.03 | 1.64 | 1.82 |
| orf19.1977   |       | 1.27 | 0.84 | 1.23 |
| orf19.198    | ASN1  | 1.26 | 1.03 | 1.11 |
| orf19.1981   |       | 2.54 | 1.28 | 2.96 |
| orf19.1982   |       | 1.04 | 0.32 | 1.15 |
| orf19.1988   | CDC45 | 1.96 | 1.19 | 1.38 |
| orf19.199    |       | 1.77 | 0.85 | 2.18 |
| orf19.2002   |       | 1.34 | 1.08 | 0.88 |
| orf19.2005   | REG1  | 3.24 | 1.26 | 2.80 |
| orf19.2007   |       | 2.72 | 1.13 | 1.42 |
| orf19.2012   | NOT3  | 1.77 | 1.24 | 1.54 |
| orf19.2014   | BCY1  | 2.37 | 1.68 | 1.65 |
| orf19.2015   |       | 2.31 | 1.49 | 1.70 |
| orf19.2016   |       | 1.34 | 0.69 | 1.07 |
| orf19.2017   |       | 1.13 | 0.90 | 0.84 |
| orf19.2019   |       | 1.20 | 1.02 | 1.10 |
| orf19.202    | CDC47 | 1.62 | 0.69 | 1.30 |
| orf19.2020   | HGT6  | 1.46 | 0.44 | 1.56 |
| orf19.2021   | HGT8  | 1.12 | 1.29 | 1.08 |
| orf19.2022   |       | 1.21 | 1.27 | 1.06 |
| orf19.2023   | HGT7  | 1.25 | 0.85 | 1.01 |
| orf19.2039   |       | 1.95 | 1.20 | 1.04 |
| orf19.2040   |       | 1.46 | 0.99 | 1.17 |
| orf19.2041   |       | 1.44 | 1.21 | 1.18 |
| orf19.2043   |       | 1.06 | 1.63 | 1.13 |
| orf19.2050   |       | 3.38 | 3.07 | 1.94 |
| orf19.2055   | NPL6  | 1.47 | 1.12 | 1.21 |
| orf19.2063   |       | 1.94 | 1.34 | 1.66 |
| orf19.2069   | SMF3  | 1.20 | 1.38 | 1.72 |
| orf19.2075   | DFG5  | 1.75 | 1.20 | 1.12 |

|              |        |      |      |      |
|--------------|--------|------|------|------|
| orf19.2076   |        | 1.73 | 1.03 | 1.79 |
| orf19.2078   |        | 3.04 | 2.03 | 1.93 |
| orf19.2081   |        | 1.33 | 0.87 | 1.29 |
| orf19.2088   |        | 1.91 | 1.36 | 1.16 |
| orf19.2090   |        | 0.52 | 0.63 | 0.46 |
| orf19.2092   |        | 2.36 | 2.98 | 1.52 |
| orf19.2098   | ARO8   | 1.63 | 2.99 | 1.66 |
| orf19.2099   |        | 1.85 | 1.42 | 1.30 |
| orf19.2101   |        | 1.21 | 1.10 | 1.51 |
| orf19.2102   | CKB1   | 1.26 | 1.27 | 1.00 |
| orf19.2107.1 | STF2   | 0.53 | 4.36 | 0.80 |
| orf19.2110   |        | 2.89 | 1.04 | 1.17 |
| orf19.2111.2 | RPL38  | 0.88 | 0.66 | 1.16 |
| orf19.2112   |        | 2.37 | 0.98 | 1.50 |
| orf19.2115   |        | 1.18 | 0.60 | 0.81 |
| orf19.2116   | NAT2   | 1.51 | 1.09 | 1.08 |
| orf19.2124   |        | 2.22 | 0.96 | 1.90 |
| orf19.2128   |        | 1.46 | 0.97 | 0.99 |
| orf19.2135   | TSM1   | 1.56 | 1.12 | 1.39 |
| orf19.2138   | ILS1   | 1.02 | 0.96 | 0.86 |
| orf19.2143   |        | 0.89 | 0.86 | 0.84 |
| orf19.2146   |        | 2.41 | 1.10 | 5.50 |
| orf19.2151   | NAG6   | 2.12 | 1.30 | 1.65 |
| orf19.2154   | HXK1   | 1.40 | 1.34 | 1.27 |
| orf19.2158   | NAG3   | 2.70 | 1.01 | 2.07 |
| orf19.2167   |        | 0.74 | 1.93 | 0.68 |
| orf19.2168.3 |        | 1.81 | 0.54 | 1.34 |
| orf19.2175   |        | 1.43 | 2.23 | 1.37 |
| orf19.2176   | IFM3   | 4.22 | 1.65 | 1.54 |
| orf19.2179.2 | RPS10  | 1.16 | 0.63 | 1.06 |
| orf19.2183   | KRE30  | 1.07 | 0.72 | 0.87 |
| orf19.2192   | GDH2   | 3.07 | 3.04 | 1.25 |
| orf19.2197   |        | 2.73 | 1.69 | 2.65 |
| orf19.220    | PIR1   | 0.96 | 1.16 | 0.78 |
| orf19.2200   |        | 1.84 | 0.79 | 1.67 |
| orf19.2201   |        | 0.80 | 0.58 | 0.81 |
| orf19.2208   |        | 1.16 | 1.57 | 0.94 |
| orf19.2209   | YVC1   | 1.61 | 0.66 | 1.09 |
| orf19.2214   |        | 1.43 | 0.76 | 1.05 |
| orf19.2215   | GLE1   | 1.80 | 1.20 | 1.19 |
| orf19.2216   |        | 2.00 | 1.71 | 2.21 |
| orf19.2219   | ORF298 | 1.33 | 2.61 | 1.12 |
| orf19.2221   |        | 1.16 | 0.82 | 0.89 |
| orf19.2232   | RPL11  | 1.07 | 0.60 | 1.03 |
| orf19.2236   |        | 0.75 | 0.53 | 0.61 |
| orf19.2246   |        | 1.43 | 0.98 | 1.22 |
| orf19.2248   | ARE2   | 0.88 | 2.26 | 0.83 |
| orf19.2250   |        | 1.17 | 0.89 | 0.91 |
| orf19.2256   |        | 1.25 | 0.91 | 0.96 |
| orf19.2257   |        | 1.94 | 1.07 | 1.57 |
| orf19.2259   |        | 1.20 | 1.15 | 1.11 |
| orf19.2260   |        | 0.89 | 1.52 | 1.61 |
| orf19.2261   |        | 0.80 | 1.34 | 0.94 |
| orf19.2264   | OLE2   | 1.21 | 1.04 | 0.88 |
| orf19.2265   |        | 1.32 | 1.17 | 1.36 |
| orf19.2268   | RCK2   | 1.53 | 2.03 | 0.89 |
| orf19.2269   |        | 1.69 | 1.18 | 1.58 |
| orf19.227    | COX7   | 1.17 | 0.71 | 1.01 |
| orf19.2275   |        | 0.84 | 0.54 | 0.86 |
| orf19.2278   |        | 1.99 | 1.09 | 1.58 |
| orf19.2283   | DQD1   | 1.60 | 2.79 | 1.43 |
| orf19.2286   |        | 0.90 | 1.02 | 0.85 |
| orf19.2287   | RPA12  | 0.81 | 0.96 | 0.76 |
| orf19.2288   |        | 1.13 | 0.74 | 1.00 |
| orf19.2294.1 |        | 1.97 | 1.34 | 1.28 |
| orf19.2296   |        | 2.64 | 1.44 | 1.41 |
| orf19.2297   | ARL3   | 3.35 | 1.08 | 1.30 |

|              |        |      |      |      |
|--------------|--------|------|------|------|
| orf19.2298   |        | 1.56 | 0.84 | 1.37 |
| orf19.2304   |        | 2.11 | 1.24 | 1.57 |
| orf19.2309.2 |        | 1.50 | 0.92 | 1.15 |
| orf19.2310.1 | RPL29  | 0.92 | 0.48 | 0.84 |
| orf19.2311   | RPL82  | 0.99 | 1.10 | 0.92 |
| orf19.2318.1 |        | 1.53 | 0.51 | 1.34 |
| orf19.2319   |        | 0.73 | 0.79 | 0.52 |
| orf19.2324   | UBA4   | 0.76 | 1.89 | 0.72 |
| orf19.2328   |        | 2.24 | 0.88 | 1.31 |
| orf19.2329.1 | RPS17B | 1.04 | 0.64 | 0.95 |
| orf19.233.1  | HRT1   | 2.17 | 1.40 | 1.52 |
| orf19.2330   |        | 1.45 | 0.90 | 1.18 |
| orf19.2335   |        | 0.99 | 1.43 | 0.89 |
| orf19.2340   | CDC48  | 1.70 | 1.32 | 1.29 |
| orf19.2347   | MNN2   | 1.34 | 1.03 | 1.87 |
| orf19.2351   | NIT3   | 1.88 | 3.17 | 1.84 |
| orf19.2355   | ALS10  | 1.66 | 1.15 | 1.04 |
| orf19.2358   |        | 1.30 | 1.85 | 1.06 |
| orf19.2360   | URA2   | 0.99 | 0.74 | 0.68 |
| orf19.2363   |        | 1.17 | 0.94 | 0.96 |
| orf19.2364   | MIS11  | 1.36 | 0.77 | 0.91 |
| orf19.2365   | POL2   | 1.17 | 0.98 | 1.21 |
| orf19.2368   |        | 1.10 | 1.35 | 1.20 |
| orf19.2369.1 | ATX1   | 1.38 | 5.23 | 1.72 |
| orf19.2371   |        | 1.70 | 2.23 | 1.34 |
| orf19.2372   |        | 2.13 | 3.62 | 1.63 |
| orf19.2374   |        | 2.19 | 2.87 | 1.80 |
| orf19.2376   |        | 1.46 | 1.18 | 1.27 |
| orf19.2378   |        | 1.47 | 0.90 | 1.58 |
| orf19.2379   | NOT4   | 1.72 | 1.51 | 1.42 |
| orf19.2382   |        | 1.63 | 0.88 | 1.54 |
| orf19.2386   |        | 0.99 | 1.48 | 0.63 |
| orf19.2387   |        | 0.96 | 0.54 | 0.91 |
| orf19.2392   |        | 0.82 | 1.59 | 0.86 |
| orf19.2398   |        | 2.14 | 1.55 | 1.62 |
| orf19.240    |        | 1.19 | 0.88 | 1.07 |
| orf19.2400   |        | 1.71 | 1.39 | 0.84 |
| orf19.2404   |        | 1.13 | 1.03 | 0.74 |
| orf19.2407   | DPS1-1 | 1.38 | 1.02 | 1.07 |
| orf19.241    |        | 1.44 | 1.25 | 1.32 |
| orf19.2418   |        | 1.58 | 0.97 | 1.60 |
| orf19.2419   |        | 1.27 | 1.19 | 1.08 |
| orf19.2422   | ARC1   | 1.47 | 1.34 | 1.09 |
| orf19.2425.2 |        | 1.27 | 0.88 | 1.18 |
| orf19.2426   |        | 2.55 | 0.90 | 1.34 |
| orf19.2435   | MSI3   | 1.49 | 1.08 | 0.98 |
| orf19.2437   | ARC35  | 1.99 | 1.12 | 1.60 |
| orf19.2438   |        | 1.07 | 0.74 | 0.73 |
| orf19.2439   |        | 2.13 | 1.12 | 1.37 |
| orf19.2451   | PGA45  | 0.75 | 0.73 | 1.12 |
| orf19.2452   |        | 0.56 | 0.61 | 0.86 |
| orf19.2454   | PHO87  | 0.82 | 1.34 | 1.22 |
| orf19.247    |        | 2.22 | 1.37 | 1.92 |
| orf19.2471   | GIM5   | 1.40 | 1.06 | 1.54 |
| orf19.2473   |        | 1.15 | 0.86 | 1.13 |
| orf19.2478.1 |        | 1.26 | 0.82 | 1.21 |
| orf19.2483   |        | 1.25 | 0.68 | 1.17 |
| orf19.2484   |        | 1.72 | 0.92 | 1.41 |
| orf19.2485   |        | 1.04 | 0.73 | 0.70 |
| orf19.2487   |        | 1.93 | 1.25 | 1.31 |
| orf19.2488   | FAL1   | 0.78 | 1.26 | 0.67 |
| orf19.2489   |        | 1.16 | 0.74 | 0.79 |
| orf19.2496   |        | 2.36 | 1.16 | 1.82 |
| orf19.25     |        | 1.06 | 1.28 | 0.73 |
| orf19.250    | SLC1   | 1.12 | 0.69 | 0.95 |
| orf19.2500   |        | 2.12 | 4.03 | 2.25 |
| orf19.2501   | FLC1   | 1.18 | 0.87 | 1.49 |

|              |        |      |      |      |
|--------------|--------|------|------|------|
| orf19.2504   | BMS1   | 1.14 | 1.09 | 1.09 |
| orf19.2507   | ARP9   | 1.58 | 1.16 | 1.71 |
| orf19.2511.1 | MRPL33 | 1.53 | 0.80 | 1.21 |
| orf19.2512   |        | 1.11 | 0.93 | 0.76 |
| orf19.2514   |        | 1.54 | 1.39 | 1.19 |
| orf19.2520   |        | 1.34 | 0.89 | 1.25 |
| orf19.2524   | MGE1   | 1.16 | 1.14 | 1.00 |
| orf19.2525   | LYS12  | 1.20 | 0.83 | 1.12 |
| orf19.2527   |        | 0.76 | 0.62 | 0.76 |
| orf19.2528   |        | 1.40 | 0.99 | 0.85 |
| orf19.2538   | PTC2   | 1.18 | 1.16 | 0.83 |
| orf19.2544   |        | 1.51 | 1.04 | 1.38 |
| orf19.2547   |        | 0.61 | 0.58 | 0.56 |
| orf19.2550   |        | 1.79 | 2.15 | 1.77 |
| orf19.2551   | MET6   | 1.37 | 0.82 | 1.02 |
| orf19.2555   | URA5   | 1.13 | 1.16 | 1.28 |
| orf19.2557   | SEC65  | 1.46 | 1.36 | 1.42 |
| orf19.2559   | CDC4   | 1.12 | 0.98 | 1.02 |
| orf19.2560   | CDC60  | 1.32 | 1.22 | 1.16 |
| orf19.2562   | CDC60B | 1.47 | 1.14 | 1.08 |
| orf19.2563   |        | 1.17 | 0.94 | 1.60 |
| orf19.2564   |        | 1.42 | 1.03 | 0.91 |
| orf19.2570   |        | 1.82 | 1.42 | 1.66 |
| orf19.2594   |        | 0.75 | 0.63 | 0.69 |
| orf19.2598   | VMA4   | 1.65 | 1.19 | 1.38 |
| orf19.260    | SLD1   | 0.86 | 0.88 | 1.08 |
| orf19.2601   | HEM1   | 0.45 | 1.73 | 0.81 |
| orf19.2604   |        | 0.81 | 1.01 | 0.38 |
| orf19.2606   | HDA1   | 1.30 | 0.97 | 1.08 |
| orf19.2608   | ADH5   | 0.95 | 1.26 | 1.17 |
| orf19.2611   | MCM6   | 1.98 | 1.47 | 1.49 |
| orf19.2613   | ECM4   | 1.48 | 2.45 | 0.93 |
| orf19.2622   | YPT31  | 1.91 | 1.20 | 1.51 |
| orf19.2631   |        | 1.10 | 1.14 | 0.79 |
| orf19.2632   |        | 0.64 | 0.94 | 0.60 |
| orf19.2634   |        | 1.51 | 1.21 | 1.12 |
| orf19.2639   |        | 0.82 | 0.86 | 0.75 |
| orf19.2639.1 |        | 1.84 | 1.24 | 1.65 |
| orf19.2640   | FUR1   | 1.19 | 0.93 | 0.96 |
| orf19.2643   |        | 1.04 | 0.86 | 0.87 |
| orf19.2650   |        | 1.48 | 1.36 | 0.80 |
| orf19.2650.1 |        | 1.14 | 0.63 | 1.02 |
| orf19.2651   | CAM1-1 | 1.55 | 0.85 | 1.08 |
| orf19.2658   |        | 1.86 | 1.17 | 1.60 |
| orf19.2661   | TLO34  | 1.84 | 1.13 | 1.20 |
| orf19.2662   |        | 1.45 | 2.06 | 1.73 |
| orf19.2664   |        | 2.09 | 1.14 | 1.09 |
| orf19.2665   | MSN5   | 1.61 | 2.01 | 1.50 |
| orf19.2666   |        | 1.48 | 1.64 | 1.35 |
| orf19.2667   | RPF1   | 0.74 | 1.11 | 0.80 |
| orf19.2669   |        | 1.57 | 1.50 | 1.15 |
| orf19.267    |        | 1.40 | 1.03 | 1.46 |
| orf19.2672   | NCP1   | 1.37 | 0.95 | 1.15 |
| orf19.2676   |        | 0.86 | 0.73 | 0.99 |
| orf19.2677   |        | 2.38 | 0.80 | 1.47 |
| orf19.2680   |        | 1.72 | 0.82 | 1.46 |
| orf19.2682   |        | 1.91 | 1.77 | 1.68 |
| orf19.2687.1 |        | 1.10 | 1.11 | 0.97 |
| orf19.269    | SES1   | 1.45 | 0.97 | 1.05 |
| orf19.2690   |        | 1.15 | 1.26 | 1.23 |
| orf19.2694   | TYS1   | 1.08 | 0.76 | 0.88 |
| orf19.2695   | UBR1   | 1.64 | 1.68 | 1.30 |
| orf19.2697   |        | 1.78 | 1.10 | 0.86 |
| orf19.2709   | ZUO1   | 1.29 | 1.22 | 1.07 |
| orf19.2710   |        | 1.70 | 2.08 | 1.87 |
| orf19.2711   |        | 0.80 | 0.65 | 0.58 |
| orf19.2712   | HCA4   | 0.87 | 1.08 | 0.48 |

|              |        |      |      |      |
|--------------|--------|------|------|------|
| orf19.2717   | SAS10  | 0.92 | 1.21 | 0.80 |
| orf19.2720   |        | 1.50 | 1.15 | 1.14 |
| orf19.2721   |        | 1.83 | 5.63 | 2.31 |
| orf19.2727   | GRX3   | 1.74 | 1.02 | 1.47 |
| orf19.273    |        | 1.30 | 0.78 | 1.06 |
| orf19.2735   | SEN2   | 0.61 | 0.52 | 0.68 |
| orf19.2736   |        | 1.06 | 0.36 | 0.72 |
| orf19.2749   |        | 2.22 | 2.57 | 1.19 |
| orf19.2755   |        | 1.56 | 1.07 | 1.29 |
| orf19.2757   |        | 1.52 | 1.85 | 1.26 |
| orf19.2758   | PGA38  | 0.66 | 0.67 | 0.87 |
| orf19.2759   |        | 0.98 | 0.93 | 1.05 |
| orf19.2760   |        | 1.29 | 1.48 | 0.99 |
| orf19.2761   |        | 3.84 | 1.10 | 1.72 |
| orf19.2762   | AHP1   | 0.85 | 1.29 | 1.00 |
| orf19.2765   | PGA62  | 1.21 | 0.66 | 1.26 |
| orf19.2767   | PGA59  | 1.15 | 0.71 | 1.01 |
| orf19.2769   |        | 2.15 | 2.83 | 1.80 |
| orf19.2772   | HOS3   | 2.10 | 3.07 | 2.80 |
| orf19.2774   |        | 0.97 | 0.70 | 0.81 |
| orf19.2775   | IDI1   | 1.55 | 0.63 | 1.24 |
| orf19.2785   | ATP7   | 1.68 | 1.15 | 1.52 |
| orf19.2786   |        | 2.70 | 1.10 | 2.25 |
| orf19.2790   |        | 1.57 | 0.77 | 1.26 |
| orf19.2794   |        | 1.10 | 0.88 | 2.34 |
| orf19.2795   |        | 1.18 | 0.96 | 0.79 |
| orf19.280    |        | 2.39 | 1.13 | 1.67 |
| orf19.2801   |        | 2.03 | 3.12 | 1.84 |
| orf19.2803   | HEM13  | 0.40 | 1.09 | 0.87 |
| orf19.2815   |        | 1.17 | 1.10 | 1.20 |
| orf19.2820   |        | 1.59 | 1.72 | 1.29 |
| orf19.2823   | RFG1   | 1.50 | 0.96 | 0.95 |
| orf19.2824   |        | 1.28 | 0.91 | 1.07 |
| orf19.2826   |        | 1.59 | 1.09 | 1.41 |
| orf19.2830   | RRP9   | 0.55 | 0.99 | 0.41 |
| orf19.2834   | RPD3   | 1.25 | 1.55 | 1.13 |
| orf19.2835   |        | 1.44 | 1.78 | 1.32 |
| orf19.2841   | PGM2   | 1.56 | 1.70 | 1.37 |
| orf19.2843   | RHO1   | 1.45 | 0.55 | 1.31 |
| orf19.2847   |        | 1.14 | 0.95 | 0.67 |
| orf19.2850   |        | 2.10 | 1.30 | 1.31 |
| orf19.2857   |        | 1.88 | 1.21 | 1.15 |
| orf19.2859   | SRP40  | 0.88 | 0.64 | 0.56 |
| orf19.2862   | RIB1   | 2.30 | 5.94 | 1.39 |
| orf19.2866   |        | 1.20 | 1.62 | 1.55 |
| orf19.2873   | TOP2   | 1.81 | 0.81 | 1.33 |
| orf19.2881   | MNN4   | 0.94 | 1.10 | 0.81 |
| orf19.2889   |        | 1.42 | 1.33 | 1.34 |
| orf19.2901   | NUP60  | 1.33 | 0.96 | 1.18 |
| orf19.2907.1 |        | 1.73 | 1.21 | 1.25 |
| orf19.2915   |        | 3.25 | 0.86 | 2.01 |
| orf19.2917   |        | 0.81 | 0.95 | 0.64 |
| orf19.2920   |        | 1.22 | 1.19 | 1.25 |
| orf19.2924   |        | 1.85 | 0.98 | 1.17 |
| orf19.2926   |        | 2.09 | 1.84 | 1.99 |
| orf19.2927   | MNN11  | 0.90 | 0.79 | 0.77 |
| orf19.2928   |        | 1.68 | 0.57 | 1.74 |
| orf19.2929   | GSC1   | 1.34 | 0.57 | 0.96 |
| orf19.2930   |        | 1.30 | 0.78 | 1.08 |
| orf19.2934   |        | 1.01 | 0.73 | 0.66 |
| orf19.2935   | RPL10  | 1.14 | 0.86 | 0.98 |
| orf19.2938   |        | 1.58 | 1.10 | 1.60 |
| orf19.2943   |        | 3.33 | 0.54 | 1.53 |
| orf19.2947   | SNZ1   | 2.21 | 1.06 | 1.36 |
| orf19.2953   |        | 0.92 | 0.84 | 0.97 |
| orf19.2954   |        | 2.95 | 1.39 | 2.10 |
| orf19.2956   | MGM101 | 1.97 | 1.02 | 1.48 |



|              |        |      |      |      |
|--------------|--------|------|------|------|
| orf19.2960   | FRS2   | 1.39 | 1.09 | 1.09 |
| orf19.2965   |        | 1.32 | 0.90 | 1.07 |
| orf19.2966   |        | 1.55 | 1.19 | 1.66 |
| orf19.2967   | TIF34  | 1.36 | 0.96 | 1.09 |
| orf19.2969   | RAD16  | 0.72 | 2.17 | 0.85 |
| orf19.2970   | LYS2   | 2.07 | 3.01 | 1.53 |
| orf19.2980   |        | 1.35 | 1.03 | 1.59 |
| orf19.2983   | CDC73  | 1.67 | 1.36 | 1.45 |
| orf19.2987   |        | 1.32 | 0.89 | 1.01 |
| orf19.299    | ECM14  | 1.51 | 1.00 | 1.10 |
| orf19.2990   | XOG1   | 0.93 | 0.22 | 0.87 |
| orf19.2992   | RPP1A  | 1.29 | 0.80 | 1.25 |
| orf19.2994   | RPL13  | 1.30 | 0.93 | 1.12 |
| orf19.2994.1 | RPS16A | 1.20 | 0.70 | 1.17 |
| orf19.30     |        | 1.49 | 0.61 | 1.23 |
| orf19.300    | AIP2   | 1.71 | 0.78 | 1.40 |
| orf19.3002   | RPS1   | 1.21 | 0.83 | 1.14 |
| orf19.3003.1 | RPL6   | 1.16 | 0.90 | 1.24 |
| orf19.3004   |        | 1.47 | 0.89 | 1.17 |
| orf19.3008   | COQ4   | 1.99 | 1.38 | 1.71 |
| orf19.3015   | ARX1   | 0.70 | 0.89 | 0.63 |
| orf19.3016   |        | 1.45 | 1.21 | 1.13 |
| orf19.3022   |        | 1.57 | 0.73 | 1.05 |
| orf19.3034   | RLI1   | 0.80 | 0.73 | 0.71 |
| orf19.3035   |        | 1.39 | 1.15 | 1.30 |
| orf19.3037   |        | 1.13 | 1.09 | 0.93 |
| orf19.3038   | TPS2   | 1.64 | 2.67 | 1.88 |
| orf19.304    |        | 1.21 | 0.61 | 0.90 |
| orf19.3040   | EHT1   | 1.50 | 1.26 | 0.85 |
| orf19.3045   |        | 1.84 | 1.16 | 1.61 |
| orf19.3051   |        | 1.28 | 0.59 | 1.57 |
| orf19.3053   |        | 1.03 | 2.35 | 1.23 |
| orf19.3057   |        | 1.92 | 0.93 | 1.35 |
| orf19.3058   |        | 1.58 | 1.14 | 1.38 |
| orf19.3059   | SUA71  | 0.97 | 1.72 | 0.68 |
| orf19.3063   |        | 4.25 | 1.26 | 1.49 |
| orf19.3064   | MRPL27 | 1.08 | 0.74 | 1.19 |
| orf19.308    |        | 1.41 | 0.62 | 0.91 |
| orf19.3084   |        | 4.36 | 1.38 | 2.35 |
| orf19.3086   |        | 2.50 | 0.90 | 1.63 |
| orf19.3087   | UBI3   | 1.03 | 0.64 | 1.08 |
| orf19.3088   |        | 0.88 | 0.55 | 0.88 |
| orf19.3091   |        | 1.03 | 0.90 | 0.95 |
| orf19.3097   | PDA1   | 1.22 | 0.68 | 0.90 |
| orf19.3098   |        | 0.99 | 1.05 | 1.05 |
| orf19.3102   | CTA6   | 2.42 | 1.14 | 2.03 |
| orf19.3103   |        | 1.12 | 1.06 | 0.73 |
| orf19.3104   | YDC1   | 1.95 | 3.25 | 1.58 |
| orf19.3106   | MET16  | 1.51 | 0.82 | 1.21 |
| orf19.3120   |        | 1.35 | 1.31 | 2.56 |
| orf19.3122.2 |        | 1.43 | 1.31 | 1.21 |
| orf19.3124   |        | 0.91 | 1.29 | 0.69 |
| orf19.3125   |        | 0.78 | 0.82 | 1.08 |
| orf19.3126   | CCT6   | 1.25 | 0.86 | 0.89 |
| orf19.3127   | CZF1   | 1.43 | 1.20 | 0.48 |
| orf19.3129   |        | 1.26 | 1.12 | 1.03 |
| orf19.3133   | GUT2   | 0.74 | 1.76 | 0.57 |
| orf19.3138   | NOP1   | 0.73 | 0.53 | 0.49 |
| orf19.3140.1 |        | 1.82 | 1.92 | 1.69 |
| orf19.3141   |        | 0.84 | 1.00 | 1.11 |
| orf19.3144   |        | 3.01 | 1.07 | 2.37 |
| orf19.3145.4 |        | 0.82 | 0.76 | 0.95 |
| orf19.3149   | LSP1   | 1.37 | 1.01 | 1.09 |
| orf19.3158   |        | 1.95 | 1.93 | 1.49 |
| orf19.3159   | UTP20  | 0.66 | 0.84 | 0.50 |
| orf19.316    | SEC13  | 2.38 | 1.98 | 2.01 |
| orf19.3166   |        | 1.50 | 1.12 | 1.08 |

|              |        |      |      |      |
|--------------|--------|------|------|------|
| orf19.3167   |        | 1.09 | 0.99 | 0.92 |
| orf19.317    |        | 1.56 | 1.32 | 1.38 |
| orf19.3170   |        | 1.14 | 1.76 | 0.83 |
| orf19.3171   | ACH1   | 2.73 | 0.71 | 1.32 |
| orf19.3174   | CDC24  | 1.53 | 1.19 | 1.71 |
| orf19.3175   |        | 1.56 | 1.84 | 1.03 |
| orf19.3177   |        | 1.49 | 0.80 | 0.96 |
| orf19.3178   |        | 1.44 | 1.72 | 1.67 |
| orf19.3182   | GIS2   | 1.39 | 0.66 | 1.09 |
| orf19.3185   |        | 1.41 | 0.59 | 0.75 |
| orf19.3192   | STI1   | 1.94 | 1.08 | 1.55 |
| orf19.3205   |        | 1.19 | 0.62 | 0.98 |
| orf19.3207   | CCN1   | 1.67 | 1.26 | 1.16 |
| orf19.3211   | RCF3   | 2.73 | 1.52 | 1.31 |
| orf19.3222   |        | 1.95 | 0.83 | 2.23 |
| orf19.3227   | FTH2   | 1.49 | 0.95 | 0.95 |
| orf19.3228   |        | 1.73 | 1.32 | 1.28 |
| orf19.3230   | BOI2   | 1.30 | 1.20 | 1.32 |
| orf19.3235   |        | 1.66 | 1.55 | 1.53 |
| orf19.3240   | ERG27  | 1.76 | 0.66 | 1.25 |
| orf19.3242   |        | 2.20 | 1.79 | 2.02 |
| orf19.3244   |        | 1.63 | 0.87 | 1.49 |
| orf19.3247   |        | 1.56 | 1.20 | 1.74 |
| orf19.3249   | LAG1   | 2.55 | 0.80 | 1.39 |
| orf19.3251   | ARC19  | 1.73 | 1.42 | 1.47 |
| orf19.3256   | SLN1   | 1.34 | 1.92 | 1.22 |
| orf19.326    |        | 1.84 | 2.13 | 2.70 |
| orf19.3262   |        | 1.42 | 0.62 | 0.86 |
| orf19.3265   | TRM1   | 1.61 | 1.13 | 0.99 |
| orf19.3268   |        | 1.24 | 0.50 | 1.16 |
| orf19.327    | HTA3   | 1.05 | 0.46 | 0.93 |
| orf19.3275   |        | 1.03 | 0.79 | 1.05 |
| orf19.3276   | PWP2   | 0.68 | 0.73 | 0.52 |
| orf19.3278   | GSY1   | 0.95 | 1.01 | 1.04 |
| orf19.328    | NPR2   | 1.27 | 0.96 | 1.23 |
| orf19.329    |        | 1.40 | 1.37 | 1.59 |
| orf19.3290   |        | 2.30 | 1.50 | 1.75 |
| orf19.3291   | HMT1   | 0.89 | 0.68 | 0.69 |
| orf19.3293   |        | 2.08 | 0.65 | 1.65 |
| orf19.3294   | MBF1   | 1.60 | 1.37 | 1.40 |
| orf19.3297   |        | 1.06 | 0.88 | 1.07 |
| orf19.3298   | CCH1   | 1.48 | 1.22 | 1.21 |
| orf19.33     |        | 0.98 | 1.09 | 1.09 |
| orf19.330.1  |        | 1.25 | 0.80 | 1.04 |
| orf19.3300   | ZPR1   | 1.06 | 1.24 | 0.86 |
| orf19.3303   |        | 0.59 | 1.06 | 0.59 |
| orf19.3304   |        | 1.05 | 1.39 | 0.76 |
| orf19.331    |        | 1.62 | 1.08 | 1.34 |
| orf19.3310   |        | 2.34 | 0.96 | 1.74 |
| orf19.3312   |        | 2.19 | 1.31 | 1.48 |
| orf19.3324   | TIF    | 1.44 | 0.88 | 1.06 |
| orf19.3325   |        | 1.42 | 1.15 | 1.34 |
| orf19.3325.3 | RPS21B | 1.06 | 0.66 | 1.12 |
| orf19.3327   | TRM2   | 0.74 | 0.38 | 0.38 |
| orf19.333    | FCY2   | 0.76 | 1.22 | 1.06 |
| orf19.3331   | ABC1   | 1.07 | 1.48 | 0.77 |
| orf19.3333   |        | 1.38 | 1.04 | 0.80 |
| orf19.3334   | RPS21  | 1.13 | 0.57 | 0.98 |
| orf19.334    |        | 1.90 | 2.59 | 2.14 |
| orf19.3341   |        | 1.23 | 1.17 | 0.99 |
| orf19.3344   | VPS17  | 2.49 | 4.18 | 5.50 |
| orf19.3345   | SIZ1   | 1.07 | 0.82 | 0.87 |
| orf19.3348   |        | 1.26 | 0.99 | 1.24 |
| orf19.3349   |        | 1.37 | 0.90 | 0.93 |
| orf19.3350   | MRP20  | 1.02 | 0.83 | 0.97 |
| orf19.3354   |        | 1.05 | 0.60 | 0.82 |
| orf19.3357   |        | 1.18 | 1.06 | 1.04 |

|              |        |      |      |      |
|--------------|--------|------|------|------|
| orf19.3358   | LSC1   | 1.72 | 0.75 | 1.17 |
| orf19.3359   | ARP8   | 2.18 | 2.85 | 1.67 |
| orf19.336    | YAH1   | 1.11 | 2.32 | 0.99 |
| orf19.3363   | VTC4   | 0.82 | 0.38 | 0.96 |
| orf19.3365   | DAO2   | 1.24 | 1.39 | 1.30 |
| orf19.3366   | CSH3   | 1.83 | 0.97 | 1.44 |
| orf19.3366.1 |        | 1.41 | 0.93 | 1.07 |
| orf19.3367   |        | 1.10 | 0.92 | 1.06 |
| orf19.3370   | DOT4   | 0.64 | 0.83 | 0.70 |
| orf19.338    |        | 1.58 | 0.70 | 0.86 |
| orf19.3385   |        | 1.46 | 1.30 | 1.19 |
| orf19.3386   |        | 2.08 | 1.32 | 1.69 |
| orf19.339    | NDE1   | 0.76 | 1.11 | 0.68 |
| orf19.3390   |        | 1.59 | 1.72 | 0.99 |
| orf19.3391   | ADK1   | 1.04 | 0.89 | 0.91 |
| orf19.3393   |        | 0.76 | 1.15 | 0.68 |
| orf19.3394   |        | 2.00 | 1.37 | 1.49 |
| orf19.3402   |        | 2.11 | 2.09 | 1.34 |
| orf19.3409   | SEC12  | 2.24 | 1.04 | 1.37 |
| orf19.3415   | PTK2   | 1.91 | 1.13 | 1.89 |
| orf19.3415.1 | RPL32  | 1.08 | 0.67 | 1.13 |
| orf19.3419   | MAE1   | 2.70 | 1.17 | 2.14 |
| orf19.3422   | FMP27  | 1.74 | 1.22 | 1.48 |
| orf19.3423   | TIF3   | 1.25 | 0.99 | 1.02 |
| orf19.3429   | FGR47  | 1.10 | 1.16 | 0.86 |
| orf19.3431   |        | 1.52 | 1.05 | 1.04 |
| orf19.3438   |        | 2.04 | 1.00 | 1.43 |
| orf19.3442   |        | 0.84 | 1.39 | 1.14 |
| orf19.3445   | HOC1   | 1.50 | 0.95 | 1.02 |
| orf19.3450.1 |        | 2.66 | 1.51 | 1.66 |
| orf19.3451   |        | 1.68 | 1.08 | 1.25 |
| orf19.3457   |        | 1.45 | 0.88 | 1.40 |
| orf19.3462   | SAR1   | 1.34 | 0.92 | 1.44 |
| orf19.3463   |        | 0.81 | 1.72 | 0.64 |
| orf19.3470   |        | 1.28 | 0.70 | 1.01 |
| orf19.3473   |        | 1.86 | 1.42 | 2.26 |
| orf19.3476   |        | 1.65 | 1.36 | 1.29 |
| orf19.3477   |        | 0.71 | 0.79 | 0.42 |
| orf19.3479   |        | 1.23 | 1.38 | 0.93 |
| orf19.3480   |        | 1.01 | 0.68 | 0.75 |
| orf19.3482   |        | 1.74 | 3.18 | 1.56 |
| orf19.349    |        | 1.37 | 0.90 | 1.13 |
| orf19.3498   |        | 2.48 | 1.26 | 1.56 |
| orf19.350    | PRE9   | 1.39 | 1.15 | 1.13 |
| orf19.3505   |        | 3.80 | 1.12 | 1.61 |
| orf19.3521   | ARH2   | 5.19 | 2.19 | 1.24 |
| orf19.3523   | CRK1   | 1.47 | 1.28 | 1.41 |
| orf19.3526   | ITR1   | 3.12 | 1.33 | 2.16 |
| orf19.3527   | CYT1   | 1.45 | 0.87 | 1.27 |
| orf19.353    | ULP1   | 0.81 | 1.18 | 0.88 |
| orf19.3530   | CKA2   | 1.01 | 0.99 | 0.69 |
| orf19.3532   | MRPL10 | 1.43 | 0.98 | 1.26 |
| orf19.3533   |        | 1.23 | 1.00 | 2.29 |
| orf19.3534   | RHO3   | 1.56 | 0.84 | 1.34 |
| orf19.3539   |        | 1.13 | 1.06 | 1.21 |
| orf19.354    |        | 0.80 | 1.34 | 1.29 |
| orf19.3540   | MAK5   | 0.63 | 0.90 | 0.48 |
| orf19.3541   | ERF1   | 1.05 | 0.64 | 0.78 |
| orf19.3547   |        | 0.81 | 0.74 | 0.56 |
| orf19.3548   |        | 6.08 | 1.15 | 1.37 |
| orf19.3548.1 | WH11   | 4.28 | 1.90 | 1.88 |
| orf19.3552   |        | 1.71 | 1.00 | 1.38 |
| orf19.3553   | RPF2   | 0.81 | 0.88 | 0.83 |
| orf19.3556   |        | 1.10 | 0.70 | 0.83 |
| orf19.3558   |        | 1.71 | 0.57 | 1.78 |
| orf19.3560   |        | 1.22 | 0.96 | 0.77 |
| orf19.3564   |        | 0.66 | 0.69 | 0.49 |

|              |         |      |      |      |
|--------------|---------|------|------|------|
| orf19.3569   |         | 1.46 | 1.01 | 1.53 |
| orf19.3572.3 |         | 0.99 | 0.61 | 0.87 |
| orf19.3577   | COQ5    | 1.16 | 0.85 | 1.01 |
| orf19.3579   | ATP4    | 1.54 | 0.95 | 1.14 |
| orf19.3581   |         | 1.38 | 0.83 | 1.09 |
| orf19.3582   |         | 1.21 | 1.02 | 1.16 |
| orf19.3583   |         | 1.49 | 1.90 | 1.35 |
| orf19.3585   |         | 1.13 | 0.71 | 0.81 |
| orf19.3590   | IPP1    | 1.28 | 0.88 | 1.20 |
| orf19.3591   | APE3    | 1.90 | 0.94 | 1.25 |
| orf19.3599   | TIF4631 | 1.46 | 1.04 | 0.92 |
| orf19.3603   |         | 0.79 | 0.87 | 0.86 |
| orf19.3608   |         | 0.84 | 0.86 | 1.14 |
| orf19.3609   | UTP15   | 0.90 | 0.73 | 0.82 |
| orf19.3611   |         | 1.81 | 0.93 | 1.28 |
| orf19.3616   | ERG9    | 1.30 | 0.88 | 1.05 |
| orf19.3617   |         | 2.90 | 1.10 | 1.49 |
| orf19.3618   | YWP1    | 1.35 | 0.28 | 1.25 |
| orf19.362    | TLO9    | 1.71 | 1.01 | 1.25 |
| orf19.3622   | ANP1    | 2.07 | 0.85 | 1.18 |
| orf19.3623   | SMC2    | 1.49 | 1.16 | 1.46 |
| orf19.3624   |         | 0.69 | 0.59 | 0.83 |
| orf19.3627   |         | 2.76 | 1.47 | 2.81 |
| orf19.3629   | DSE1    | 1.70 | 1.18 | 1.20 |
| orf19.3630   | RRP8    | 0.68 | 1.02 | 0.65 |
| orf19.3641   |         | 1.01 | 1.27 | 1.29 |
| orf19.3646   | CTR1    | 1.07 | 1.24 | 0.98 |
| orf19.3656   | COX15   | 0.64 | 0.93 | 0.93 |
| orf19.3658   |         | 0.92 | 0.68 | 0.86 |
| orf19.3663   | PHO91   | 1.38 | 1.35 | 0.98 |
| orf19.3669   | SHA3    | 1.45 | 0.86 | 1.31 |
| orf19.367    | CNH1    | 1.50 | 0.86 | 1.52 |
| orf19.3681   |         | 1.27 | 0.80 | 1.07 |
| orf19.3682   | CWH8    | 1.14 | 0.32 | 0.97 |
| orf19.3690   |         | 6.92 | 0.55 | 1.59 |
| orf19.3690.2 |         | 1.08 | 0.55 | 0.90 |
| orf19.3695   |         | 1.15 | 0.31 | 1.01 |
| orf19.3696   | TOM22   | 1.23 | 0.83 | 1.23 |
| orf19.3697   |         | 2.93 | 1.80 | 2.24 |
| orf19.3700   | TOM70   | 1.18 | 0.99 | 0.98 |
| orf19.3702   |         | 1.25 | 0.82 | 0.99 |
| orf19.3704.1 |         | 1.07 | 0.82 | 1.18 |
| orf19.3706   |         | 1.51 | 1.46 | 0.85 |
| orf19.3707   | YHB1    | 1.16 | 1.46 | 1.85 |
| orf19.3712   |         | 0.77 | 0.69 | 0.43 |
| orf19.3713   |         | 0.81 | 0.88 | 0.80 |
| orf19.3722   |         | 1.28 | 1.23 | 1.13 |
| orf19.3732   | ERG25   | 2.44 | 0.35 | 1.21 |
| orf19.3737   |         | 3.07 | 0.98 | 3.24 |
| orf19.374    |         | 1.81 | 0.84 | 1.17 |
| orf19.3751   |         | 0.83 | 0.18 | 0.86 |
| orf19.3755   |         | 0.82 | 0.67 | 0.79 |
| orf19.3756   | CHR1    | 0.66 | 0.97 | 0.73 |
| orf19.3757   | ATP20   | 1.26 | 0.59 | 0.98 |
| orf19.3772   |         | 1.77 | 1.47 | 1.38 |
| orf19.3775   | SSK2    | 1.41 | 0.79 | 0.79 |
| orf19.3776   |         | 1.38 | 0.84 | 1.05 |
| orf19.3777   |         | 0.78 | 0.39 | 0.76 |
| orf19.3778   |         | 0.66 | 0.80 | 0.77 |
| orf19.3779   |         | 1.05 | 0.69 | 0.62 |
| orf19.3787   |         | 1.55 | 1.14 | 1.24 |
| orf19.3788.1 | RPL30   | 1.03 | 0.66 | 1.00 |
| orf19.3789   | RPL24A  | 1.05 | 0.48 | 0.73 |
| orf19.379    |         | 1.14 | 1.30 | 0.51 |
| orf19.3791   | FGR10   | 1.98 | 1.01 | 1.35 |
| orf19.3792   |         | 1.62 | 1.21 | 1.25 |
| orf19.3796   |         | 0.93 | 1.29 | 0.96 |

|              |        |      |      |      |
|--------------|--------|------|------|------|
| orf19.3797   |        | 0.93 | 0.69 | 0.86 |
| orf19.3798   |        | 0.96 | 1.05 | 0.93 |
| orf19.3799   |        | 1.48 | 0.37 | 1.22 |
| orf19.3802   | PMT6   | 1.92 | 0.88 | 2.52 |
| orf19.3803   | MNN22  | 0.96 | 0.78 | 1.44 |
| orf19.3804   |        | 1.70 | 0.60 | 1.30 |
| orf19.3809   |        | 1.87 | 1.03 | 1.17 |
| orf19.381    |        | 2.64 | 0.65 | 1.27 |
| orf19.3810   |        | 0.67 | 0.40 | 0.49 |
| orf19.3812   | SSZ1   | 1.33 | 0.85 | 0.88 |
| orf19.3818   |        | 2.43 | 1.19 | 1.51 |
| orf19.3820   |        | 0.80 | 1.04 | 0.82 |
| orf19.3822   | SCS7   | 1.05 | 0.80 | 1.09 |
| orf19.3823   | ZDS1   | 1.25 | 0.86 | 1.37 |
| orf19.3825   | RCE1   | 1.25 | 1.06 | 1.25 |
| orf19.3826   |        | 1.56 | 2.19 | 1.72 |
| orf19.3833   |        | 1.46 | 1.36 | 1.33 |
| orf19.3835   |        | 1.45 | 1.01 | 1.22 |
| orf19.3836   |        | 0.99 | 0.67 | 1.03 |
| orf19.3838   | EFB1   | 1.43 | 0.73 | 1.09 |
| orf19.3840   |        | 1.04 | 0.95 | 1.20 |
| orf19.3845   | FGR3   | 1.94 | 1.63 | 1.65 |
| orf19.3856   | CDC28  | 1.61 | 1.08 | 1.85 |
| orf19.3858   |        | 4.07 | 2.07 | 1.62 |
| orf19.3862   |        | 6.16 | 1.98 | 2.09 |
| orf19.3867   | RPL7   | 0.84 | 1.22 | 0.67 |
| orf19.387    | GCR3   | 1.47 | 1.27 | 0.98 |
| orf19.3870   | ADE13  | 1.14 | 0.66 | 0.80 |
| orf19.3881   |        | 2.00 | 2.20 | 1.17 |
| orf19.3887   |        | 0.64 | 1.87 | 0.83 |
| orf19.3888   | PGI1   | 0.82 | 0.69 | 0.74 |
| orf19.3893   | SCW11  | 0.73 | 0.33 | 0.90 |
| orf19.3894   |        | 1.48 | 0.94 | 1.37 |
| orf19.3895   | CHT2   | 2.27 | 0.59 | 2.01 |
| orf19.3900   |        | 5.56 | 1.50 | 1.50 |
| orf19.3904   |        | 1.69 | 0.88 | 1.30 |
| orf19.391    | UPC2   | 0.58 | 1.09 | 1.08 |
| orf19.3911   | SAH1   | 1.13 | 0.80 | 0.84 |
| orf19.3914   |        | 0.67 | 0.72 | 0.56 |
| orf19.3915   |        | 1.34 | 0.94 | 1.06 |
| orf19.3919   |        | 1.84 | 0.94 | 1.58 |
| orf19.392    |        | 1.16 | 0.96 | 1.11 |
| orf19.3921   |        | 1.14 | 0.92 | 1.01 |
| orf19.3922   |        | 1.76 | 3.15 | 1.36 |
| orf19.393    |        | 1.35 | 1.42 | 1.22 |
| orf19.3938   |        | 1.24 | 0.99 | 1.03 |
| orf19.3940.1 | CUP1   | 1.03 | 0.87 | 1.24 |
| orf19.3941   | URA7   | 1.03 | 0.77 | 0.77 |
| orf19.3942   |        | 1.97 | 1.24 | 1.37 |
| orf19.3942.1 | RPL43A | 1.31 | 0.92 | 1.32 |
| orf19.3945   |        | 1.22 | 1.28 | 1.12 |
| orf19.3947   |        | 1.56 | 1.04 | 1.46 |
| orf19.3949   |        | 1.53 | 1.47 | 1.07 |
| orf19.395    | ENO1   | 0.77 | 0.71 | 0.74 |
| orf19.3950   | MSM1   | 0.57 | 0.42 | 0.55 |
| orf19.3951   | TIP1   | 2.14 | 0.88 | 1.42 |
| orf19.3952   |        | 1.83 | 1.38 | 1.18 |
| orf19.3954   |        | 1.42 | 1.06 | 1.13 |
| orf19.3955   | MES1   | 1.25 | 0.85 | 0.86 |
| orf19.3956   |        | 1.51 | 1.37 | 1.23 |
| orf19.3957   |        | 1.35 | 1.23 | 1.15 |
| orf19.3959   | SSD1   | 1.03 | 0.87 | 1.01 |
| orf19.396    | EAF6   | 1.81 | 1.92 | 2.25 |
| orf19.3960   |        | 1.92 | 1.26 | 1.51 |
| orf19.3962   | HAS1   | 1.00 | 1.00 | 0.72 |
| orf19.3963   |        | 1.58 | 0.92 | 1.27 |
| orf19.3964   | ASH2   | 0.97 | 0.54 | 0.74 |

|               |        |      |      |      |
|---------------|--------|------|------|------|
| orf19.3965    |        | 1.60 | 2.68 | 1.06 |
| orf19.3968    |        | 1.15 | 0.86 | 0.69 |
| orf19.397     |        | 1.15 | 0.75 | 0.89 |
| orf19.3977    |        | 1.26 | 1.02 | 1.00 |
| orf19.3982    |        | 1.14 | 0.88 | 1.30 |
| orf19.3983    |        | 1.49 | 0.98 | 0.89 |
| orf19.3990    |        | 0.78 | 0.71 | 0.96 |
| orf19.3991    |        | 1.26 | 1.19 | 1.48 |
| orf19.400     | GCF1   | 1.29 | 1.04 | 1.09 |
| orf19.4000    |        | 1.48 | 0.85 | 0.91 |
| orf19.4002    | DUN1   | 1.56 | 1.33 | 1.14 |
| orf19.4004    | CCT3   | 1.64 | 1.11 | 1.10 |
| orf19.401     | TCP1   | 1.23 | 0.69 | 0.84 |
| orf19.4013    |        | 1.20 | 1.05 | 1.51 |
| orf19.4014    |        | 1.76 | 1.43 | 1.33 |
| orf19.4018    |        | 1.12 | 0.68 | 0.96 |
| orf19.4022    | SDH4   | 1.06 | 0.71 | 0.97 |
| orf19.4025    | PRE1   | 1.87 | 1.56 | 1.60 |
| orf19.4026    | HIS1   | 1.09 | 1.12 | 1.04 |
| orf19.4029    |        | 1.05 | 1.46 | 0.77 |
| orf19.4032    | RPN5   | 2.39 | 2.21 | 1.91 |
| orf19.4035    | PGA4   | 1.59 | 0.25 | 1.26 |
| orf19.4036    | APM1   | 1.85 | 1.09 | 1.93 |
| orf19.4040    | ILV3   | 1.54 | 1.14 | 1.27 |
| orf19.4043    |        | 1.40 | 0.93 | 1.39 |
| orf19.4044    | MUM2   | 2.00 | 1.08 | 1.67 |
| orf19.4045    | EST1   | 1.27 | 0.99 | 1.29 |
| orf19.4048    | DES1   | 1.10 | 1.23 | 1.43 |
| orf19.405     | VCX1   | 2.28 | 0.42 | 1.59 |
| orf19.4051    | HTS1   | 1.23 | 0.73 | 1.10 |
| orf19.406     | ERG1   | 0.55 | 0.85 | 0.81 |
| orf19.4060    | ARO4   | 1.10 | 1.05 | 0.87 |
| orf19.407     | GCD6   | 1.68 | 1.24 | 1.05 |
| orf19.4072    | IFF6   | 2.30 | 1.05 | 1.63 |
| orf19.4078    |        | 1.30 | 1.45 | 1.27 |
| orf19.4079    | SLP2   | 1.25 | 1.12 | 1.14 |
| orf19.408     |        | 1.15 | 0.80 | 0.85 |
| orf19.4084    | KIS1   | 1.73 | 1.50 | 1.37 |
| orf19.4085    |        | 2.35 | 2.00 | 1.75 |
| orf19.4089    | SGT1   | 1.53 | 0.97 | 1.24 |
| orf19.409     |        | 0.94 | 1.37 | 0.77 |
| orf19.4090.1  |        | 1.45 | 0.88 | 1.55 |
| orf19.4093    | NOP7   | 1.06 | 0.93 | 0.73 |
| orf19.4099    | ECM17  | 1.66 | 0.80 | 0.84 |
| orf19.410     |        | 1.91 | 2.33 | 1.39 |
| orf19.4109    | PMT4   | 1.56 | 0.86 | 1.32 |
| orf19.4112    |        | 1.10 | 0.85 | 0.92 |
| orf19.4117    |        | 1.46 | 1.08 | 1.42 |
| orf19.412     |        | 1.29 | 0.86 | 1.33 |
| orf19.4120    | LAS1   | 0.74 | 0.73 | 0.62 |
| orf19.4122    |        | 4.25 | 2.41 | 1.58 |
| orf19.4125    |        | 0.76 | 0.84 | 0.75 |
| orf19.413.1   | RPS27A | 2.33 | 1.57 | 1.46 |
| orf19.4132    |        | 3.19 | 1.34 | 1.56 |
| orf19.4138    |        | 1.61 | 2.09 | 1.29 |
| orf19.414     |        | 0.69 | 0.62 | 0.47 |
| orf19.4142    |        | 2.27 | 0.85 | 1.23 |
| orf19.4143    |        | 1.31 | 0.96 | 1.03 |
| orf19.4146    | SMD3   | 1.80 | 1.04 | 1.16 |
| orf19.4149.1  |        | 1.35 | 0.83 | 1.09 |
| orf19.4154    |        | 1.39 | 1.10 | 0.97 |
| orf19.4155.11 |        | 1.65 | 0.81 | 0.88 |
| orf19.4159    |        | 1.69 | 1.14 | 1.29 |
| orf19.4164    |        | 1.76 | 1.50 | 1.22 |
| orf19.4166    |        | 1.16 | 0.94 | 0.94 |
| orf19.417     |        | 1.14 | 0.87 | 1.07 |
| orf19.4170    |        | 1.17 | 0.95 | 0.85 |

|              |       |      |      |      |
|--------------|-------|------|------|------|
| orf19.4172   |       | 1.85 | 1.37 | 4.53 |
| orf19.4177   | HIS5  | 1.68 | 1.04 | 1.47 |
| orf19.4182   |       | 1.49 | 0.93 | 1.21 |
| orf19.4186   | PCT1  | 1.24 | 0.88 | 0.99 |
| orf19.4188   | NMD5  | 1.09 | 0.84 | 0.71 |
| orf19.4190   |       | 1.12 | 0.88 | 0.98 |
| orf19.4191   | RLP24 | 0.84 | 0.87 | 0.64 |
| orf19.4192   | CDC14 | 1.50 | 0.31 | 0.91 |
| orf19.4193   |       | 1.57 | 1.24 | 1.62 |
| orf19.4193.1 | RPS13 | 0.99 | 0.72 | 1.00 |
| orf19.4194   |       | 1.79 | 1.24 | 2.13 |
| orf19.4195.1 | FCA1  | 1.33 | 1.26 | 1.21 |
| orf19.4199   |       | 1.20 | 1.53 | 0.81 |
| orf19.4203   |       | 1.44 | 0.83 | 1.73 |
| orf19.4204   |       | 1.16 | 0.90 | 1.18 |
| orf19.4205.1 |       | 1.49 | 1.12 | 1.50 |
| orf19.4208   | RAD52 | 1.62 | 1.34 | 1.33 |
| orf19.4211   | FET3  | 2.93 | 1.12 | 2.49 |
| orf19.4219   | RIX7  | 0.66 | 0.61 | 0.62 |
| orf19.4221   | ORC4  | 1.35 | 1.07 | 1.15 |
| orf19.4223   | GCD11 | 1.24 | 1.02 | 1.07 |
| orf19.4225   | LEU3  | 0.90 | 0.90 | 0.88 |
| orf19.423    |       | 1.45 | 1.10 | 1.28 |
| orf19.4233   | THR4  | 1.15 | 1.16 | 0.99 |
| orf19.4234   |       | 1.05 | 1.23 | 1.07 |
| orf19.424    | TRP99 | 1.49 | 1.03 | 1.48 |
| orf19.4240   |       | 1.62 | 0.96 | 1.49 |
| orf19.4241   |       | 0.90 | 0.47 | 0.88 |
| orf19.4242   | CST20 | 1.45 | 0.86 | 1.14 |
| orf19.4247   |       | 2.51 | 1.13 | 2.26 |
| orf19.4251   |       | 1.84 | 1.07 | 1.74 |
| orf19.4252   |       | 1.47 | 0.96 | 1.00 |
| orf19.4257   | INT1  | 1.15 | 0.79 | 0.90 |
| orf19.4258   |       | 1.35 | 0.97 | 1.34 |
| orf19.4261   | TIF5  | 1.07 | 0.81 | 1.00 |
| orf19.4262   |       | 1.20 | 1.07 | 1.06 |
| orf19.4265   | UAP1  | 1.60 | 2.23 | 1.23 |
| orf19.4268   |       | 0.67 | 1.04 | 0.67 |
| orf19.4273   |       | 1.09 | 0.82 | 0.69 |
| orf19.4281   |       | 0.76 | 0.73 | 0.87 |
| orf19.4282   |       | 0.74 | 0.64 | 0.66 |
| orf19.4283   |       | 1.35 | 0.94 | 1.24 |
| orf19.4287   |       | 2.81 | 1.52 | 1.53 |
| orf19.429    |       | 0.78 | 1.05 | 0.69 |
| orf19.4293   |       | 1.15 | 1.24 | 1.29 |
| orf19.4294   |       | 1.54 | 1.10 | 1.15 |
| orf19.4297   | CKB2  | 1.35 | 1.63 | 1.29 |
| orf19.4299   | MSW1  | 1.04 | 0.96 | 0.83 |
| orf19.43     |       | 2.89 | 3.65 | 1.68 |
| orf19.4305.1 |       | 2.03 | 2.17 | 1.70 |
| orf19.4306   |       | 1.78 | 1.15 | 1.46 |
| orf19.431    |       | 1.25 | 1.09 | 0.99 |
| orf19.4311   | YNK1  | 2.62 | 1.18 | 2.21 |
| orf19.4318   | MIG1  | 2.42 | 1.37 | 1.53 |
| orf19.432    |       | 0.87 | 1.59 | 1.39 |
| orf19.4322   | DAP2  | 1.86 | 1.12 | 1.47 |
| orf19.4326   |       | 1.79 | 1.23 | 1.07 |
| orf19.433    |       | 1.89 | 1.58 | 1.57 |
| orf19.4336   | RPS5  | 1.16 | 0.95 | 1.18 |
| orf19.4338   |       | 2.29 | 1.42 | 1.63 |
| orf19.434    | PRD1  | 1.82 | 1.59 | 2.01 |
| orf19.4340   |       | 2.36 | 1.56 | 2.39 |
| orf19.4346   |       | 1.97 | 1.62 | 1.77 |
| orf19.4347   |       | 0.96 | 0.64 | 0.83 |
| orf19.4349   |       | 2.02 | 1.05 | 1.54 |
| orf19.4349.6 |       | 0.83 | 0.70 | 0.80 |
| orf19.4351   | PRP12 | 2.43 | 1.15 | 1.38 |

|              |        |      |      |      |
|--------------|--------|------|------|------|
| orf19.4354   |        | 2.62 | 0.77 | 1.30 |
| orf19.4357   |        | 3.34 | 1.56 | 1.37 |
| orf19.4358   |        | 1.85 | 1.32 | 1.57 |
| orf19.4362   |        | 1.94 | 1.91 | 1.98 |
| orf19.4368   |        | 7.30 | 1.72 | 1.68 |
| orf19.437    | GRS1   | 1.31 | 1.15 | 1.07 |
| orf19.4373   |        | 2.25 | 1.98 | 1.77 |
| orf19.4375   |        | 1.09 | 1.31 | 1.06 |
| orf19.4375.1 | RPS30  | 1.11 | 0.87 | 1.15 |
| orf19.4381   | VTC3   | 1.50 | 0.93 | 1.79 |
| orf19.4382   |        | 1.55 | 1.35 | 1.84 |
| orf19.439    |        | 1.37 | 1.36 | 1.18 |
| orf19.4390   |        | 1.85 | 1.14 | 1.64 |
| orf19.4399   |        | 0.69 | 1.27 | 0.76 |
| orf19.440    | SDH1   | 1.66 | 1.18 | 1.25 |
| orf19.4413   | CMD1   | 1.17 | 0.82 | 1.21 |
| orf19.4427   | SKP1   | 1.45 | 1.06 | 1.41 |
| orf19.443    |        | 0.90 | 0.52 | 0.70 |
| orf19.4432   | KSP1   | 1.35 | 1.33 | 1.01 |
| orf19.4435   |        | 1.21 | 0.57 | 0.93 |
| orf19.4437   |        | 1.50 | 1.16 | 1.22 |
| orf19.4440   | SEC34  | 1.56 | 1.16 | 1.24 |
| orf19.4442   | ALG9   | 2.01 | 1.21 | 5.68 |
| orf19.4443   | YPD1   | 1.62 | 3.11 | 1.17 |
| orf19.4444   | PHO15  | 1.20 | 2.49 | 1.30 |
| orf19.4446   |        | 2.13 | 1.58 | 1.54 |
| orf19.445    |        | 1.27 | 0.77 | 1.04 |
| orf19.4451   | RIA1   | 1.05 | 0.85 | 0.62 |
| orf19.4456   | GAP4   | 1.72 | 0.59 | 0.96 |
| orf19.4457   | BNI4   | 1.70 | 1.48 | 1.60 |
| orf19.4477   | CSH1   | 1.77 | 0.94 | 1.24 |
| orf19.4478   |        | 1.53 | 0.95 | 1.56 |
| orf19.4479   |        | 0.70 | 1.05 | 0.67 |
| orf19.4482   | IFI3   | 1.65 | 1.26 | 1.40 |
| orf19.4484   |        | 5.62 | 1.00 | 1.62 |
| orf19.4490   | RPL17B | 1.24 | 0.92 | 1.11 |
| orf19.4490.2 | QCR8   | 1.60 | 1.00 | 1.44 |
| orf19.4491   | ERG20  | 1.24 | 0.69 | 0.88 |
| orf19.4492   |        | 0.69 | 1.37 | 0.61 |
| orf19.4494   | KTR2   | 1.36 | 0.90 | 1.19 |
| orf19.4495   | NDH51  | 2.27 | 0.95 | 1.27 |
| orf19.4496   |        | 1.43 | 0.94 | 1.34 |
| orf19.4499   | RIM2   | 0.46 | 0.79 | 0.50 |
| orf19.4517   |        | 1.41 | 1.26 | 0.97 |
| orf19.4519   | SUV3   | 0.56 | 0.67 | 0.51 |
| orf19.4521   |        | 1.23 | 0.87 | 0.97 |
| orf19.4525   |        | 1.51 | 1.29 | 1.81 |
| orf19.4532   |        | 1.09 | 0.96 | 0.84 |
| orf19.4536   | CYS4   | 1.20 | 0.74 | 0.79 |
| orf19.4537   |        | 1.30 | 0.86 | 1.34 |
| orf19.4538   |        | 1.63 | 1.34 | 1.09 |
| orf19.454    | SFL1   | 0.59 | 1.32 | 0.61 |
| orf19.4542   |        | 1.60 | 1.59 | 1.12 |
| orf19.4545   | SWI4   | 1.51 | 1.12 | 1.34 |
| orf19.4546   | HOL4   | 0.97 | 1.18 | 0.82 |
| orf19.4550   |        | 1.89 | 1.54 | 1.87 |
| orf19.4552   |        | 1.42 | 2.28 | 1.30 |
| orf19.4558   |        | 1.60 | 0.56 | 0.89 |
| orf19.4560   |        | 1.16 | 0.93 | 1.10 |
| orf19.4563   |        | 0.50 | 0.78 | 0.36 |
| orf19.4565   | BGL2   | 1.38 | 0.84 | 1.18 |
| orf19.4577.3 |        | 1.44 | 1.07 | 1.44 |
| orf19.458    |        | 1.31 | 0.98 | 0.93 |
| orf19.4582   |        | 1.17 | 1.34 | 0.85 |
| orf19.4587   | HGH1   | 0.97 | 1.17 | 1.09 |
| orf19.4605   | TYR1   | 1.89 | 1.41 | 1.21 |
| orf19.4606   | ERG8   | 2.29 | 1.10 | 1.34 |



|              |        |      |      |      |
|--------------|--------|------|------|------|
| orf19.461    |        | 2.93 | 1.71 | 2.41 |
| orf19.4611   |        | 1.02 | 1.07 | 0.85 |
| orf19.4615   |        | 2.08 | 1.02 | 1.47 |
| orf19.4617   |        | 0.64 | 2.03 | 1.21 |
| orf19.462    |        | 3.46 | 1.38 | 2.15 |
| orf19.4620   |        | 0.98 | 1.50 | 1.17 |
| orf19.4621   |        | 1.05 | 1.72 | 1.37 |
| orf19.4622   |        | 1.41 | 1.12 | 1.08 |
| orf19.4623   |        | 1.33 | 0.96 | 0.74 |
| orf19.4623.3 | NHP6A  | 1.14 | 0.62 | 1.18 |
| orf19.4625   | TOA2   | 1.50 | 1.15 | 1.03 |
| orf19.4627   |        | 1.50 | 1.79 | 1.03 |
| orf19.4632   | RPL20B | 1.34 | 0.82 | 1.05 |
| orf19.4633   |        | 1.72 | 1.27 | 1.20 |
| orf19.4634   |        | 1.04 | 0.99 | 0.48 |
| orf19.4635   | NIP1   | 1.16 | 1.22 | 1.03 |
| orf19.4639   |        | 0.94 | 0.72 | 0.82 |
| orf19.4640   | PWP1   | 0.92 | 0.89 | 0.80 |
| orf19.4641   | NMT1   | 1.62 | 0.99 | 1.17 |
| orf19.4657   |        | 0.61 | 0.51 | 0.35 |
| orf19.4658   |        | 1.45 | 1.51 | 1.90 |
| orf19.4659   |        | 1.11 | 0.93 | 1.02 |
| orf19.4660   | RPS6A  | 1.09 | 0.75 | 0.98 |
| orf19.4664   |        | 1.05 | 1.29 | 1.56 |
| orf19.4665   |        | 1.42 | 1.06 | 1.35 |
| orf19.4666   |        | 1.33 | 0.88 | 0.74 |
| orf19.4676   |        | 2.24 | 0.79 | 1.54 |
| orf19.4678   |        | 1.87 | 1.48 | 1.27 |
| orf19.4679   | AGP2   | 1.84 | 1.01 | 1.00 |
| orf19.4681   | RAT1   | 0.69 | 1.14 | 0.69 |
| orf19.4683   | MLP1   | 1.67 | 0.83 | 0.89 |
| orf19.4684.2 | RPL40B | 1.13 | 0.70 | 1.12 |
| orf19.4686   |        | 1.34 | 1.99 | 1.27 |
| orf19.4689   | PGA57  | 1.86 | 1.20 | 1.24 |
| orf19.469    | HST7   | 2.11 | 1.17 | 1.86 |
| orf19.4697   | MDN1   | 1.51 | 1.36 | 0.87 |
| orf19.4704   | ARO1   | 1.61 | 1.27 | 1.26 |
| orf19.4705   |        | 1.09 | 0.80 | 0.78 |
| orf19.4718   | TRP5   | 1.49 | 1.74 | 0.93 |
| orf19.4719   | CWH41  | 1.90 | 1.14 | 1.38 |
| orf19.4721   |        | 1.38 | 1.17 | 1.38 |
| orf19.4726   |        | 2.82 | 2.57 | 2.84 |
| orf19.4732   | SEC24  | 2.46 | 1.28 | 1.76 |
| orf19.4746   | JIP5   | 0.51 | 0.75 | 0.37 |
| orf19.4747   | HEM14  | 1.17 | 3.21 | 1.28 |
| orf19.4751   |        | 1.26 | 1.41 | 1.26 |
| orf19.4753   | PFK26  | 1.64 | 2.06 | 1.85 |
| orf19.476    |        | 1.78 | 1.00 | 2.04 |
| orf19.4760   |        | 0.77 | 0.99 | 0.54 |
| orf19.4766   |        | 1.85 | 1.57 | 1.84 |
| orf19.477    |        | 1.63 | 1.11 | 1.47 |
| orf19.4771   |        | 2.91 | 1.77 | 1.40 |
| orf19.4777   | DAK2   | 1.09 | 2.59 | 1.62 |
| orf19.4796   |        | 1.90 | 1.22 | 1.58 |
| orf19.4808   | NUP188 | 0.83 | 1.10 | 0.88 |
| orf19.4809   | ERG12  | 1.55 | 0.63 | 1.38 |
| orf19.481    | GCD1   | 1.43 | 0.97 | 1.10 |
| orf19.4813   | GUA1   | 0.93 | 0.45 | 0.73 |
| orf19.4815   | YTM1   | 0.80 | 0.88 | 1.07 |
| orf19.4816   |        | 1.20 | 1.35 | 1.00 |
| orf19.4819   |        | 1.62 | 1.16 | 1.64 |
| orf19.482    | RPT4   | 1.81 | 1.90 | 1.50 |
| orf19.4820   |        | 1.09 | 1.74 | 1.10 |
| orf19.4824   |        | 1.37 | 1.31 | 1.26 |
| orf19.4826   | IDH1   | 1.56 | 1.21 | 1.16 |
| orf19.4827   | ADE12  | 1.04 | 0.91 | 0.97 |
| orf19.4830   |        | 2.34 | 1.08 | 2.09 |

|              |        |      |      |      |
|--------------|--------|------|------|------|
| orf19.4835   |        | 0.45 | 0.82 | 0.39 |
| orf19.4836   | URA1   | 0.77 | 0.99 | 0.93 |
| orf19.4837   |        | 1.71 | 1.90 | 1.28 |
| orf19.4839   |        | 1.78 | 0.86 | 1.65 |
| orf19.484    | MRPL40 | 0.98 | 0.52 | 0.76 |
| orf19.4844   |        | 1.21 | 0.75 | 0.64 |
| orf19.4845   |        | 1.39 | 0.96 | 1.52 |
| orf19.4846   |        | 0.78 | 0.94 | 0.87 |
| orf19.4848   | SKI3   | 1.73 | 1.07 | 1.12 |
| orf19.4859   |        | 9.01 | 2.99 | 2.22 |
| orf19.4862   |        | 2.09 | 0.87 | 1.99 |
| orf19.4862.2 |        | 1.78 | 2.51 | 1.72 |
| orf19.4865   |        | 1.21 | 0.67 | 1.08 |
| orf19.4870   | DBP3   | 0.77 | 0.78 | 0.83 |
| orf19.4874   | MNN3   | 1.26 | 1.18 | 1.16 |
| orf19.4879.2 | NTF2   | 0.82 | 0.55 | 0.81 |
| orf19.488    | MEX67  | 1.51 | 1.42 | 1.11 |
| orf19.4882   |        | 1.42 | 0.56 | 0.89 |
| orf19.4885   | MIR1   | 2.03 | 0.95 | 1.56 |
| orf19.4888   |        | 1.69 | 2.09 | 3.41 |
| orf19.4889   |        | 0.73 | 0.55 | 0.81 |
| orf19.489    | DAP1   | 0.71 | 2.51 | 1.24 |
| orf19.4896   |        | 1.10 | 1.21 | 0.98 |
| orf19.4897   |        | 1.86 | 1.31 | 1.45 |
| orf19.4898   |        | 1.66 | 3.03 | 1.44 |
| orf19.490    |        | 1.30 | 1.71 | 1.49 |
| orf19.4903   |        | 2.23 | 1.11 | 2.30 |
| orf19.4909   | CBK1   | 1.93 | 1.07 | 1.12 |
| orf19.4909.1 | RPL42  | 1.05 | 0.65 | 0.91 |
| orf19.4921   |        | 2.73 | 2.09 | 2.58 |
| orf19.4922   |        | 1.41 | 1.05 | 1.68 |
| orf19.4927   | BNI1   | 1.56 | 1.05 | 1.33 |
| orf19.4929   |        | 0.87 | 0.99 | 0.77 |
| orf19.493    | RPL15A | 1.18 | 0.97 | 1.14 |
| orf19.4931.1 | RPL14  | 1.23 | 0.84 | 1.06 |
| orf19.4932   |        | 1.27 | 0.70 | 0.97 |
| orf19.4937   | CHS3   | 1.52 | 1.19 | 1.22 |
| orf19.4938   |        | 2.20 | 1.53 | 1.61 |
| orf19.4939   |        | 1.98 | 1.09 | 2.08 |
| orf19.4940   |        | 1.17 | 0.96 | 0.68 |
| orf19.4941   | TYE7   | 1.23 | 0.42 | 1.37 |
| orf19.4947   |        | 1.50 | 0.99 | 1.37 |
| orf19.4951   |        | 1.74 | 2.12 | 1.18 |
| orf19.4952.1 |        | 1.59 | 2.07 | 1.39 |
| orf19.4955   |        | 1.90 | 0.93 | 1.69 |
| orf19.4959   |        | 1.37 | 0.84 | 1.05 |
| orf19.4960   |        | 1.23 | 1.47 | 0.90 |
| orf19.4963   |        | 0.76 | 0.62 | 0.58 |
| orf19.4966   |        | 2.59 | 1.78 | 1.27 |
| orf19.497    | EAF7   | 1.49 | 1.18 | 1.07 |
| orf19.498    |        | 1.08 | 0.67 | 0.78 |
| orf19.4980   | HSP70  | 4.18 | 1.13 | 1.50 |
| orf19.4987   | NUP49  | 1.64 | 1.52 | 1.42 |
| orf19.4998   |        | 1.08 | 0.64 | 1.07 |
| orf19.5      |        | 1.88 | 0.81 | 1.19 |
| orf19.500    |        | 0.78 | 0.79 | 0.69 |
| orf19.5006   |        | 1.24 | 0.71 | 1.10 |
| orf19.5007   | ACT1   | 1.29 | 0.83 | 1.14 |
| orf19.5009   |        | 0.91 | 1.19 | 0.85 |
| orf19.501    |        | 0.80 | 0.87 | 0.53 |
| orf19.5010   | DIM1   | 0.54 | 0.73 | 0.71 |
| orf19.5015   | MYO2   | 1.96 | 0.90 | 1.33 |
| orf19.5016   |        | 1.35 | 0.93 | 1.05 |
| orf19.5020   |        | 0.58 | 0.29 | 0.59 |
| orf19.5021   | PDX1   | 1.16 | 0.97 | 0.83 |
| orf19.5023   | DAL7   | 1.17 | 1.52 | 1.12 |
| orf19.5024   | GND1   | 1.16 | 1.50 | 1.03 |

|              |        |      |      |      |
|--------------|--------|------|------|------|
| orf19.5026   |        | 2.15 | 1.44 | 1.07 |
| orf19.5027   | LCB2   | 2.13 | 0.98 | 2.19 |
| orf19.5030   |        | 2.29 | 1.63 | 2.47 |
| orf19.5034   |        | 1.12 | 0.94 | 1.30 |
| orf19.5036   |        | 1.99 | 1.17 | 1.92 |
| orf19.5038   |        | 0.52 | 0.53 | 0.41 |
| orf19.5040   |        | 1.33 | 1.49 | 1.10 |
| orf19.505    | SRV2   | 1.71 | 1.34 | 1.49 |
| orf19.5054   |        | 1.58 | 1.02 | 1.36 |
| orf19.5058   | SMI1   | 2.17 | 1.64 | 1.44 |
| orf19.5059   | GCS1   | 0.69 | 2.05 | 0.61 |
| orf19.506    | YDJ1   | 1.29 | 1.05 | 0.93 |
| orf19.5061   | ADE5,7 | 1.15 | 0.80 | 0.82 |
| orf19.5062   |        | 1.35 | 0.69 | 0.80 |
| orf19.5063   |        | 0.92 | 0.50 | 0.81 |
| orf19.5064   | MRPL3  | 1.01 | 0.64 | 0.77 |
| orf19.5065   |        | 1.81 | 1.25 | 1.44 |
| orf19.5066   |        | 0.92 | 0.91 | 0.58 |
| orf19.5068   |        | 1.14 | 1.46 | 1.51 |
| orf19.5071   | NRP1   | 1.07 | 0.81 | 0.90 |
| orf19.5076   | PFY1   | 1.40 | 1.11 | 1.38 |
| orf19.5079   | CDR4   | 1.94 | 5.39 | 1.57 |
| orf19.5081   | FUN12  | 1.11 | 0.75 | 0.77 |
| orf19.5083   | DRG1   | 1.25 | 1.02 | 1.01 |
| orf19.5085   |        | 1.13 | 0.84 | 0.95 |
| orf19.5093   |        | 2.10 | 1.07 | 1.19 |
| orf19.51     |        | 1.52 | 1.52 | 1.04 |
| orf19.5100   | MLT1   | 1.15 | 0.71 | 0.97 |
| orf19.5103   |        | 1.56 | 1.42 | 2.37 |
| orf19.5104   | LTP1   | 1.32 | 0.93 | 1.13 |
| orf19.5105   |        | 0.78 | 0.88 | 0.84 |
| orf19.5106   | DIP2   | 0.66 | 1.13 | 0.64 |
| orf19.5107   | NOT5   | 1.66 | 1.85 | 1.05 |
| orf19.5117   | OLE1   | 0.69 | 0.31 | 0.62 |
| orf19.512    |        | 0.93 | 0.68 | 0.55 |
| orf19.5126   |        | 1.07 | 1.22 | 1.05 |
| orf19.5128   |        | 1.20 | 1.23 | 1.00 |
| orf19.5131   |        | 3.86 | 3.34 | 2.91 |
| orf19.5133   |        | 1.22 | 2.29 | 1.84 |
| orf19.5136   |        | 0.52 | 1.92 | 0.93 |
| orf19.5137.1 | HHO1   | 1.23 | 0.30 | 1.19 |
| orf19.514    | SNP3   | 1.09 | 0.53 | 0.96 |
| orf19.5143   |        | 1.25 | 0.79 | 0.89 |
| orf19.5148   | CYR1   | 2.44 | 0.76 | 1.84 |
| orf19.5155   | CHS6   | 2.67 | 1.18 | 1.52 |
| orf19.5158   |        | 2.10 | 2.19 | 2.01 |
| orf19.516    |        | 2.14 | 0.97 | 1.15 |
| orf19.5160   |        | 1.27 | 0.94 | 1.07 |
| orf19.5161   |        | 1.20 | 0.82 | 0.96 |
| orf19.5164   | ECM39  | 1.48 | 0.74 | 1.31 |
| orf19.5165   |        | 2.36 | 1.26 | 1.71 |
| orf19.5168   |        | 1.44 | 0.91 | 0.95 |
| orf19.5170   | ENA21  | 0.66 | 0.62 | 0.63 |
| orf19.5171   | PMT1   | 1.42 | 0.61 | 1.19 |
| orf19.5178   | ERG5   | 1.01 | 0.41 | 0.81 |
| orf19.518    |        | 0.90 | 0.76 | 0.68 |
| orf19.5180   |        | 1.37 | 1.00 | 1.08 |
| orf19.5184   |        | 2.18 | 1.30 | 1.48 |
| orf19.519    |        | 0.97 | 0.73 | 0.87 |
| orf19.5192   |        | 2.06 | 0.82 | 0.88 |
| orf19.5195   |        | 1.12 | 0.98 | 1.16 |
| orf19.5196   | ESS1   | 1.69 | 1.93 | 1.39 |
| orf19.5197   | APE2   | 1.13 | 0.87 | 0.87 |
| orf19.5198   | NOP4   | 0.59 | 1.23 | 0.43 |
| orf19.5200   | SIT4   | 2.17 | 1.85 | 1.67 |
| orf19.5201   |        | 1.31 | 0.90 | 1.17 |
| orf19.5203   |        | 2.23 | 1.47 | 1.62 |

|              |        |      |      |      |
|--------------|--------|------|------|------|
| orf19.5206   |        | 0.61 | 0.99 | 0.54 |
| orf19.5208   |        | 0.62 | 0.93 | 0.70 |
| orf19.5211   | IDP1   | 1.87 | 1.26 | 1.41 |
| orf19.5213.1 | COX8   | 1.33 | 0.88 | 1.27 |
| orf19.5213.2 | COX9   | 1.36 | 0.77 | 1.20 |
| orf19.5216   |        | 1.14 | 0.93 | 1.38 |
| orf19.5219   | IRA2   | 1.11 | 1.61 | 0.92 |
| orf19.5226   | WRS1   | 1.66 | 0.97 | 1.38 |
| orf19.5228   | RIB3   | 0.88 | 1.85 | 0.93 |
| orf19.5229   |        | 1.03 | 0.89 | 0.83 |
| orf19.5230   | MRPS9  | 1.17 | 1.23 | 1.08 |
| orf19.5232   | CSI2   | 0.74 | 0.83 | 0.64 |
| orf19.5234   | RBD1   | 1.52 | 1.12 | 1.25 |
| orf19.5235   |        | 1.17 | 0.65 | 0.87 |
| orf19.5241   | SNT1   | 1.10 | 0.95 | 0.78 |
| orf19.5242   | CDC6   | 0.98 | 0.28 | 0.75 |
| orf19.5243   | TRP3   | 1.95 | 1.94 | 1.23 |
| orf19.5244   | MCD4   | 2.19 | 1.08 | 1.67 |
| orf19.526    | NHP2   | 1.17 | 0.97 | 0.88 |
| orf19.5263   | SER33  | 1.13 | 1.38 | 1.00 |
| orf19.5267   |        | 2.05 | 0.76 | 1.48 |
| orf19.5278   |        | 1.11 | 0.71 | 1.01 |
| orf19.5279   |        | 1.09 | 0.87 | 1.03 |
| orf19.528    |        | 1.41 | 1.13 | 1.33 |
| orf19.5281   |        | 1.34 | 0.73 | 0.90 |
| orf19.5288   | IFE2   | 0.75 | 4.70 | 1.19 |
| orf19.5293   |        | 1.64 | 1.21 | 1.35 |
| orf19.5294   | PDB1   | 1.06 | 0.69 | 0.75 |
| orf19.5295   |        | 2.68 | 1.23 | 1.60 |
| orf19.5299   | ECM1   | 0.76 | 0.73 | 0.67 |
| orf19.5321   |        | 1.73 | 1.19 | 1.40 |
| orf19.5323   | MDH1-3 | 1.98 | 1.17 | 1.85 |
| orf19.5328   | GCN1   | 1.08 | 0.54 | 0.66 |
| orf19.5329   |        | 1.20 | 0.76 | 0.93 |
| orf19.5334   |        | 0.79 | 0.64 | 0.86 |
| orf19.5337   | UBC15  | 1.87 | 1.10 | 1.63 |
| orf19.5340   |        | 2.51 | 1.11 | 1.46 |
| orf19.5341   | RPS4A  | 1.14 | 0.52 | 0.92 |
| orf19.5342.1 | MTR2   | 1.04 | 0.98 | 1.19 |
| orf19.5343   | ASH1   | 0.94 | 0.38 | 0.88 |
| orf19.5348   | TPS3   | 1.11 | 1.28 | 1.15 |
| orf19.5350   |        | 1.36 | 1.21 | 1.42 |
| orf19.5351   | TIF11  | 1.32 | 0.92 | 1.10 |
| orf19.5356   |        | 0.61 | 1.37 | 0.48 |
| orf19.536    |        | 1.93 | 1.17 | 1.37 |
| orf19.5360   | RPC11  | 1.27 | 1.01 | 1.12 |
| orf19.5364   |        | 1.42 | 1.08 | 1.31 |
| orf19.5365   |        | 1.20 | 0.88 | 0.88 |
| orf19.5366   |        | 1.53 | 1.05 | 1.16 |
| orf19.5369   |        | 1.51 | 0.90 | 1.51 |
| orf19.5375   |        | 1.73 | 0.86 | 1.56 |
| orf19.5377   | HOS2   | 1.93 | 0.94 | 1.70 |
| orf19.5383   | PMA1   | 1.24 | 0.81 | 0.85 |
| orf19.5384   | CHS8   | 1.20 | 0.58 | 0.96 |
| orf19.5390   |        | 1.31 | 2.03 | 1.39 |
| orf19.5391   |        | 0.81 | 1.08 | 0.80 |
| orf19.5392   | NGT1   | 2.17 | 1.22 | 1.98 |
| orf19.5393   |        | 1.01 | 1.45 | 0.93 |
| orf19.5394.1 |        | 1.38 | 0.93 | 0.89 |
| orf19.54     | RHD1   | 1.13 | 0.74 | 1.82 |
| orf19.5406   |        | 1.43 | 1.08 | 1.15 |
| orf19.5407   |        | 0.63 | 0.76 | 0.51 |
| orf19.5408   |        | 1.00 | 2.90 | 1.20 |
| orf19.5411   |        | 2.14 | 1.27 | 2.01 |
| orf19.5418   |        | 1.31 | 0.67 | 1.30 |
| orf19.542    | HXK2   | 1.11 | 1.54 | 1.17 |
| orf19.542.2  |        | 1.49 | 1.50 | 1.69 |

|              |       |      |      |      |
|--------------|-------|------|------|------|
| orf19.5420   |       | 1.05 | 0.78 | 0.80 |
| orf19.5425   |       | 0.72 | 0.81 | 0.67 |
| orf19.543    |       | 2.35 | 1.40 | 1.62 |
| orf19.5430   | BUD21 | 0.93 | 1.76 | 0.96 |
| orf19.5432   | TPT1  | 1.22 | 0.99 | 1.16 |
| orf19.5433   |       | 0.98 | 0.57 | 1.06 |
| orf19.5436   |       | 1.20 | 0.87 | 0.84 |
| orf19.5437   | RHR2  | 0.77 | 1.17 | 0.63 |
| orf19.544.1  | PRE6  | 1.69 | 1.43 | 1.60 |
| orf19.5444   |       | 1.19 | 0.92 | 1.19 |
| orf19.5454   | DAL1  | 3.08 | 1.22 | 2.31 |
| orf19.5455   |       | 1.42 | 0.66 | 2.02 |
| orf19.5459   |       | 1.56 | 0.68 | 1.20 |
| orf19.5463   |       | 1.86 | 1.19 | 1.26 |
| orf19.5466   | RPS24 | 1.40 | 0.84 | 1.34 |
| orf19.5475   |       | 2.06 | 1.77 | 1.21 |
| orf19.5477   |       | 1.66 | 0.58 | 0.81 |
| orf19.5480   | ILV1  | 1.33 | 1.04 | 1.73 |
| orf19.5483   |       | 1.69 | 1.03 | 1.60 |
| orf19.5486   |       | 1.35 | 1.42 | 1.07 |
| orf19.5486.1 | SMD2  | 0.91 | 0.55 | 0.98 |
| orf19.5487   | CDC46 | 1.65 | 0.61 | 1.10 |
| orf19.549    |       | 0.84 | 0.52 | 0.81 |
| orf19.5493   | GSP1  | 1.41 | 0.99 | 1.22 |
| orf19.5495   |       | 1.39 | 0.77 | 1.19 |
| orf19.55     |       | 0.65 | 1.00 | 1.10 |
| orf19.550    | PDX3  | 1.11 | 1.42 | 0.97 |
| orf19.5500   | MAK16 | 0.63 | 0.90 | 0.66 |
| orf19.5501   | YAF9  | 2.77 | 1.83 | 1.60 |
| orf19.5505   | HIS7  | 1.65 | 1.59 | 1.27 |
| orf19.5510   |       | 1.03 | 0.83 | 1.01 |
| orf19.5515   |       | 1.13 | 0.83 | 1.14 |
| orf19.5516   |       | 1.45 | 1.10 | 1.12 |
| orf19.5519   | GCV1  | 1.99 | 0.84 | 1.36 |
| orf19.552    |       | 3.42 | 1.34 | 2.62 |
| orf19.5525   |       | 2.14 | 2.41 | 1.69 |
| orf19.5530   | NAB3  | 1.66 | 1.82 | 1.11 |
| orf19.5534   |       | 1.21 | 1.43 | 1.33 |
| orf19.5535   |       | 1.41 | 0.83 | 1.46 |
| orf19.5541   |       | 0.81 | 0.35 | 0.45 |
| orf19.5547   |       | 1.85 | 1.33 | 1.60 |
| orf19.5550   | MRT4  | 0.78 | 1.12 | 0.72 |
| orf19.5553   |       | 1.30 | 1.44 | 1.13 |
| orf19.5558   | RBF1  | 1.58 | 0.69 | 1.02 |
| orf19.5563   | RNH1  | 1.62 | 0.99 | 1.80 |
| orf19.5564   |       | 1.64 | 0.99 | 1.54 |
| orf19.5569   |       | 1.27 | 1.74 | 1.28 |
| orf19.5571   |       | 1.02 | 0.86 | 1.00 |
| orf19.5572   |       | 1.02 | 0.77 | 0.77 |
| orf19.5574   |       | 1.52 | 0.97 | 1.58 |
| orf19.5576   |       | 0.61 | 0.32 | 0.67 |
| orf19.558    | GUT1  | 0.78 | 0.38 | 0.53 |
| orf19.559    | FGR14 | 0.80 | 1.16 | 0.94 |
| orf19.5591   | ADO1  | 1.30 | 1.01 | 1.09 |
| orf19.5597   | POL5  | 1.00 | 1.10 | 0.82 |
| orf19.5599   | MDL2  | 1.69 | 1.01 | 0.99 |
| orf19.5600   |       | 1.27 | 1.04 | 0.97 |
| orf19.5607   |       | 1.05 | 0.82 | 0.71 |
| orf19.5608   |       | 0.82 | 0.85 | 0.76 |
| orf19.5614   |       | 2.65 | 1.01 | 1.45 |
| orf19.5615   | AYR2  | 1.69 | 1.14 | 1.50 |
| orf19.5618   |       | 2.24 | 3.86 | 2.10 |
| orf19.5619   |       | 2.03 | 1.05 | 1.90 |
| orf19.5622   | GLC3  | 2.05 | 1.52 | 1.62 |
| orf19.5623   | ARP4  | 1.68 | 0.88 | 1.20 |
| orf19.5624   |       | 1.48 | 0.67 | 1.28 |
| orf19.5627   |       | 1.33 | 1.15 | 0.97 |

|              |       |      |      |      |
|--------------|-------|------|------|------|
| orf19.5628   |       | 0.87 | 0.96 | 0.80 |
| orf19.563    | RRP15 | 0.61 | 1.36 | 0.46 |
| orf19.5630   | APA2  | 1.21 | 1.82 | 1.34 |
| orf19.5631   |       | 2.24 | 1.29 | 1.78 |
| orf19.5639   | HIS4  | 1.45 | 1.26 | 1.16 |
| orf19.5642   |       | 1.53 | 0.62 | 1.50 |
| orf19.5645   | MET15 | 2.26 | 0.66 | 1.08 |
| orf19.5647   | SUB2  | 1.39 | 1.04 | 1.30 |
| orf19.5650   | PRO3  | 2.34 | 1.22 | 1.99 |
| orf19.5657   | SW1   | 1.28 | 1.00 | 1.26 |
| orf19.5658   | MNN10 | 1.33 | 0.91 | 1.33 |
| orf19.5661   | PTC7  | 1.29 | 0.96 | 1.13 |
| orf19.5665   |       | 1.51 | 0.99 | 1.46 |
| orf19.5667   | MNR2  | 1.51 | 1.97 | 1.27 |
| orf19.5669   |       | 1.65 | 1.15 | 1.37 |
| orf19.5675   |       | 0.92 | 1.17 | 0.95 |
| orf19.5678   |       | 0.63 | 0.89 | 0.44 |
| orf19.5679   |       | 1.40 | 1.10 | 0.93 |
| orf19.568    | SPE2  | 0.89 | 1.11 | 0.69 |
| orf19.5680   |       | 1.87 | 1.74 | 2.26 |
| orf19.5682   |       | 1.03 | 0.62 | 0.91 |
| orf19.5684   |       | 0.97 | 0.86 | 1.19 |
| orf19.5685   | THS1  | 1.29 | 0.75 | 1.06 |
| orf19.5686   |       | 1.34 | 1.10 | 1.13 |
| orf19.5691   | CDC11 | 2.14 | 1.18 | 1.27 |
| orf19.5693   |       | 1.67 | 0.70 | 1.21 |
| orf19.5694   |       | 1.75 | 1.55 | 2.04 |
| orf19.5698   |       | 1.35 | 0.76 | 1.09 |
| orf19.5702   |       | 1.17 | 1.40 | 1.10 |
| orf19.5704   |       | 0.54 | 0.81 | 0.53 |
| orf19.5705   | NAM2  | 1.79 | 1.05 | 1.50 |
| orf19.5710   |       | 1.69 | 0.98 | 1.34 |
| orf19.5720   |       | 2.53 | 2.25 | 1.37 |
| orf19.5722   |       | 1.34 | 0.59 | 1.19 |
| orf19.5732   | NOG2  | 0.56 | 1.03 | 0.30 |
| orf19.5734   |       | 2.27 | 1.79 | 1.10 |
| orf19.5742   | ALS9  | 1.64 | 2.41 | 1.35 |
| orf19.5746   | ALA1  | 1.70 | 1.14 | 1.16 |
| orf19.5747   |       | 1.18 | 1.02 | 0.85 |
| orf19.5750   | SHM2  | 1.11 | 0.52 | 0.79 |
| orf19.5751   | ORM1  | 1.72 | 1.09 | 1.07 |
| orf19.5759   | SNQ2  | 1.17 | 1.70 | 0.66 |
| orf19.5764   | SKI8  | 1.45 | 1.22 | 0.96 |
| orf19.5765   |       | 1.71 | 1.66 | 1.45 |
| orf19.5767   |       | 1.97 | 1.25 | 1.88 |
| orf19.5771   | PBP2  | 1.37 | 1.49 | 1.39 |
| orf19.5773   |       | 2.79 | 0.94 | 1.81 |
| orf19.5779   | RNR1  | 1.06 | 1.06 | 0.90 |
| orf19.5783   |       | 0.87 | 0.71 | 0.68 |
| orf19.5788   | EFT2  | 1.12 | 0.62 | 0.88 |
| orf19.5789   | ADE8  | 1.27 | 0.78 | 0.99 |
| orf19.5791   | IDH2  | 1.96 | 1.50 | 1.60 |
| orf19.5799   |       | 1.24 | 0.90 | 0.91 |
| orf19.58     | RRP6  | 0.52 | 0.74 | 0.38 |
| orf19.580    |       | 2.10 | 3.23 | 2.73 |
| orf19.5801   | RNR21 | 1.21 | 0.50 | 1.28 |
| orf19.581    |       | 1.08 | 1.96 | 0.89 |
| orf19.5812   |       | 0.79 | 1.17 | 0.80 |
| orf19.5813   |       | 1.68 | 2.63 | 1.17 |
| orf19.5817   |       | 1.74 | 1.96 | 1.30 |
| orf19.5818   | SUR2  | 0.46 | 2.05 | 0.89 |
| orf19.5825   |       | 1.78 | 1.49 | 1.18 |
| orf19.5825.1 |       | 2.42 | 0.81 | 1.49 |
| orf19.5828   |       | 1.63 | 0.94 | 1.18 |
| orf19.583    |       | 1.14 | 1.25 | 0.87 |
| orf19.5832   | HPT1  | 0.95 | 0.72 | 0.80 |
| orf19.5833   |       | 1.45 | 1.56 | 1.31 |

|              |        |      |      |      |
|--------------|--------|------|------|------|
| orf19.5834   |        | 1.09 | 1.02 | 1.04 |
| orf19.5838   |        | 1.29 | 1.00 | 1.09 |
| orf19.5839   | PDR17  | 1.41 | 0.76 | 1.59 |
| orf19.5847   |        | 1.05 | 1.34 | 0.64 |
| orf19.585    |        | 0.79 | 0.73 | 0.75 |
| orf19.5850   | NOC2   | 0.83 | 1.10 | 0.64 |
| orf19.5854   | SBP1   | 1.28 | 1.04 | 1.09 |
| orf19.5858   | EGD2   | 1.39 | 1.00 | 1.32 |
| orf19.586    | ERV46  | 1.61 | 1.08 | 1.58 |
| orf19.5861   | KRE9   | 1.47 | 0.94 | 1.43 |
| orf19.5864   | URK1   | 0.94 | 1.65 | 1.17 |
| orf19.5870   | CTP1   | 1.52 | 2.32 | 1.80 |
| orf19.5872   |        | 1.43 | 0.56 | 1.69 |
| orf19.5873   | POL1   | 2.69 | 1.35 | 1.72 |
| orf19.5881   |        | 3.60 | 1.39 | 1.61 |
| orf19.5886   | CUP5   | 2.07 | 0.49 | 1.77 |
| orf19.5887   | NUP85  | 1.65 | 0.92 | 1.01 |
| orf19.5892   |        | 1.75 | 2.44 | 2.55 |
| orf19.5893   | RIP1   | 1.64 | 0.82 | 1.26 |
| orf19.5897   |        | 2.33 | 1.35 | 2.39 |
| orf19.5903   | RAX1   | 0.84 | 0.71 | 0.87 |
| orf19.5904   | RPL19A | 1.35 | 0.98 | 1.18 |
| orf19.5905   |        | 1.43 | 0.41 | 0.90 |
| orf19.5906   | ADE2   | 1.28 | 0.74 | 0.67 |
| orf19.5911   | CMK1   | 1.30 | 1.50 | 1.21 |
| orf19.5917.3 |        | 1.72 | 0.99 | 1.52 |
| orf19.5927   | RPS15  | 1.14 | 0.67 | 1.06 |
| orf19.5928   | RPP2B  | 0.95 | 0.53 | 0.81 |
| orf19.5938   | SEN1   | 2.91 | 1.49 | 1.86 |
| orf19.5943.1 |        | 1.14 | 0.83 | 1.16 |
| orf19.5947   | SEC7   | 1.41 | 0.82 | 1.05 |
| orf19.5958   | CDR2   | 1.58 | 0.77 | 1.46 |
| orf19.5959   | NOP14  | 0.69 | 0.75 | 0.47 |
| orf19.596.1  | NOP10  | 0.78 | 0.49 | 0.78 |
| orf19.5964   | ARF2   | 1.59 | 1.06 | 1.43 |
| orf19.5964.2 | RPL35  | 1.17 | 0.79 | 1.03 |
| orf19.5967   | FGR44  | 1.30 | 0.66 | 0.86 |
| orf19.597    |        | 1.37 | 1.62 | 1.17 |
| orf19.5973   |        | 3.66 | 1.46 | 1.31 |
| orf19.5974   | ATG9   | 1.41 | 1.11 | 1.34 |
| orf19.5982   | RPL18  | 1.21 | 0.70 | 1.19 |
| orf19.5985   |        | 1.64 | 1.11 | 1.26 |
| orf19.5987   |        | 0.91 | 1.52 | 0.89 |
| orf19.5991   |        | 0.47 | 0.59 | 0.38 |
| orf19.5995   | MCA1   | 1.83 | 0.88 | 1.17 |
| orf19.5996.1 | RPS19A | 1.41 | 0.75 | 1.19 |
| orf19.600    | TRK1   | 0.97 | 0.59 | 1.17 |
| orf19.6000   | CDR1   | 1.43 | 0.92 | 0.86 |
| orf19.6005   | HGT5   | 3.57 | 1.04 | 1.70 |
| orf19.6010.1 | RPB11  | 1.13 | 0.80 | 0.80 |
| orf19.6011   | SIN3   | 1.60 | 1.33 | 1.23 |
| orf19.6014   | RRS1   | 0.49 | 0.74 | 0.48 |
| orf19.6017   |        | 1.61 | 1.22 | 1.13 |
| orf19.6018   | LRO1   | 1.54 | 0.66 | 1.19 |
| orf19.6019   |        | 2.13 | 0.72 | 1.64 |
| orf19.602    |        | 1.02 | 0.68 | 0.87 |
| orf19.6027   |        | 1.57 | 1.18 | 1.41 |
| orf19.6029   | ROT1   | 0.87 | 0.55 | 0.95 |
| orf19.603    | IMP4   | 0.66 | 1.02 | 0.55 |
| orf19.6031   |        | 1.40 | 1.03 | 1.12 |
| orf19.6032   | SPE1   | 1.26 | 1.04 | 1.00 |
| orf19.6033   | CMP1   | 1.77 | 1.52 | 1.24 |
| orf19.6035   |        | 1.42 | 0.73 | 1.19 |
| orf19.6041   | RPO41  | 0.75 | 0.84 | 0.65 |
| orf19.6047   | TUF1   | 1.14 | 0.57 | 0.97 |
| orf19.6049   |        | 2.95 | 0.77 | 0.98 |
| orf19.6052   | CNS1   | 1.03 | 0.87 | 0.82 |

|              |        |      |      |      |
|--------------|--------|------|------|------|
| orf19.6056   |        | 1.31 | 1.85 | 2.08 |
| orf19.6060   | GCN20  | 1.71 | 1.10 | 1.31 |
| orf19.6062.3 |        | 2.03 | 1.10 | 1.57 |
| orf19.6065   |        | 1.92 | 1.82 | 1.95 |
| orf19.6068   | SVF1   | 2.07 | 1.16 | 1.12 |
| orf19.6074   | HBR1   | 1.01 | 1.08 | 0.87 |
| orf19.6075   |        | 1.69 | 1.00 | 1.13 |
| orf19.6081   | PHR2   | 1.00 | 1.06 | 1.00 |
| orf19.6085   | RPL16A | 1.36 | 0.87 | 1.19 |
| orf19.6090   |        | 1.02 | 0.94 | 0.82 |
| orf19.6096   | TRP1   | 1.59 | 1.19 | 1.18 |
| orf19.6099   | CCT8   | 1.57 | 0.81 | 1.19 |
| orf19.6100   |        | 1.69 | 0.86 | 1.27 |
| orf19.6105   | MVD    | 1.17 | 0.69 | 1.04 |
| orf19.6114   |        | 3.11 | 2.37 | 1.56 |
| orf19.6116   | GLK4   | 1.01 | 1.75 | 1.01 |
| orf19.6118   |        | 1.35 | 0.83 | 1.05 |
| orf19.6127   | LPD1   | 1.57 | 1.30 | 1.22 |
| orf19.6129   | MRPL8  | 1.30 | 0.82 | 0.99 |
| orf19.6133   | PIF1   | 1.10 | 1.25 | 0.97 |
| orf19.6134   |        | 1.60 | 0.92 | 1.28 |
| orf19.6136   |        | 1.34 | 1.09 | 1.04 |
| orf19.6146   | CLG1   | 1.15 | 0.81 | 0.80 |
| orf19.6147   |        | 1.38 | 0.95 | 1.04 |
| orf19.6154   |        | 1.07 | 0.82 | 0.95 |
| orf19.6156   |        | 1.47 | 0.95 | 1.41 |
| orf19.6160   |        | 1.69 | 0.78 | 0.77 |
| orf19.6171   |        | 1.87 | 1.11 | 1.22 |
| orf19.6173   | STD1   | 1.46 | 0.49 | 0.96 |
| orf19.6175   |        | 1.18 | 1.07 | 0.80 |
| orf19.6177   |        | 1.32 | 0.95 | 1.42 |
| orf19.6178   | FBP1   | 2.87 | 1.46 | 1.72 |
| orf19.6183   |        | 1.07 | 0.55 | 0.97 |
| orf19.6185   |        | 1.48 | 1.17 | 1.09 |
| orf19.6186   |        | 1.97 | 1.11 | 1.32 |
| orf19.6187   |        | 1.01 | 1.02 | 0.84 |
| orf19.6189   |        | 1.61 | 1.04 | 1.50 |
| orf19.6190   | SRB1   | 1.28 | 0.92 | 1.26 |
| orf19.6195   |        | 0.90 | 1.03 | 0.95 |
| orf19.6198.1 |        | 1.26 | 0.86 | 1.10 |
| orf19.62     |        | 1.46 | 0.66 | 0.80 |
| orf19.6209   |        | 1.15 | 0.61 | 0.81 |
| orf19.6213   | SUI2   | 1.33 | 1.10 | 1.13 |
| orf19.6217   | PGA63  | 1.43 | 0.74 | 1.15 |
| orf19.6219   |        | 2.03 | 1.48 | 2.64 |
| orf19.6220.3 | MMD1   | 1.48 | 0.51 | 1.25 |
| orf19.6220.4 |        | 1.11 | 0.67 | 0.93 |
| orf19.6227   |        | 1.04 | 0.79 | 1.25 |
| orf19.6231   | MRPL19 | 1.52 | 0.93 | 1.15 |
| orf19.6233   |        | 1.26 | 0.93 | 1.25 |
| orf19.6236   |        | 0.94 | 1.09 | 0.88 |
| orf19.6237   | RAC1   | 1.89 | 0.65 | 1.61 |
| orf19.6239   |        | 3.40 | 2.42 | 1.76 |
| orf19.6240   |        | 1.10 | 0.70 | 1.01 |
| orf19.6241   |        | 1.60 | 0.72 | 1.09 |
| orf19.6242   |        | 1.45 | 0.35 | 1.04 |
| orf19.6246   |        | 1.20 | 1.82 | 1.70 |
| orf19.6253   | RPS23A | 1.04 | 0.61 | 1.04 |
| orf19.6257   | GLT1   | 1.82 | 0.91 | 1.36 |
| orf19.6259   |        | 1.07 | 0.76 | 0.95 |
| orf19.6261   | BPH1   | 2.04 | 1.64 | 1.42 |
| orf19.6264   |        | 1.91 | 0.59 | 1.27 |
| orf19.6264.4 |        | 1.27 | 0.71 | 1.09 |
| orf19.6265   | RPS22A | 1.08 | 0.75 | 1.03 |
| orf19.6265.1 | RPS14B | 1.15 | 0.75 | 1.00 |
| orf19.6269   |        | 1.26 | 0.91 | 1.37 |
| orf19.6271   |        | 1.32 | 1.36 | 1.02 |



|              |        |       |      |      |
|--------------|--------|-------|------|------|
| orf19.6275   |        | 2.22  | 1.00 | 1.65 |
| orf19.6283   |        | 1.29  | 1.02 | 1.37 |
| orf19.6284   |        | 1.71  | 1.10 | 1.35 |
| orf19.6285   | GLC7   | 1.53  | 1.23 | 1.16 |
| orf19.6286.2 | RPS27  | 1.04  | 0.64 | 0.99 |
| orf19.6294   | MYO1   | 1.47  | 0.88 | 1.03 |
| orf19.6295   |        | 1.63  | 0.91 | 1.01 |
| orf19.6297   |        | 0.76  | 0.66 | 0.86 |
| orf19.6299   |        | 1.79  | 1.97 | 1.69 |
| orf19.6311   |        | 10.00 | 0.85 | 2.64 |
| orf19.6312   | RPS3   | 1.19  | 0.76 | 0.82 |
| orf19.6314   | RPB8   | 1.24  | 0.68 | 0.91 |
| orf19.6316.4 |        | 1.01  | 0.97 | 0.90 |
| orf19.6317   | ADE6   | 1.01  | 0.87 | 0.78 |
| orf19.6318   |        | 1.08  | 0.66 | 1.09 |
| orf19.6319   |        | 1.38  | 1.57 | 1.14 |
| orf19.6322   | ARD    | 3.39  | 0.82 | 1.20 |
| orf19.6327   | HET1   | 2.01  | 0.93 | 1.77 |
| orf19.6328   |        | 1.53  | 1.05 | 1.44 |
| orf19.6340   |        | 1.01  | 0.95 | 0.76 |
| orf19.6343   |        | 1.11  | 0.52 | 0.84 |
| orf19.6344   | RBK1   | 2.07  | 1.36 | 1.73 |
| orf19.6345   | RPG1A  | 1.26  | 1.10 | 0.93 |
| orf19.6346   |        | 0.99  | 0.91 | 0.88 |
| orf19.635.1  |        | 2.04  | 1.31 | 1.92 |
| orf19.6355   |        | 0.81  | 1.11 | 0.69 |
| orf19.6360   |        | 1.95  | 1.36 | 1.77 |
| orf19.6362   | SPA2   | 1.65  | 1.36 | 1.16 |
| orf19.6367   | SSB1   | 1.11  | 0.71 | 0.95 |
| orf19.6369   |        | 0.89  | 0.85 | 0.79 |
| orf19.6375   | RPS20  | 1.21  | 0.67 | 0.99 |
| orf19.6376   | PTC5   | 2.90  | 0.89 | 1.42 |
| orf19.6378   | TRM9   | 1.15  | 0.87 | 0.98 |
| orf19.6383   |        | 1.68  | 1.00 | 1.28 |
| orf19.6387   | HSP104 | 2.80  | 2.01 | 1.61 |
| orf19.6389   |        | 3.02  | 1.76 | 1.83 |
| orf19.6393   |        | 2.08  | 0.86 | 1.20 |
| orf19.6396   |        | 1.42  | 1.95 | 1.51 |
| orf19.64     |        | 2.39  | 1.24 | 1.41 |
| orf19.6403   |        | 1.52  | 1.13 | 1.32 |
| orf19.6403.1 | RPP2A  | 0.92  | 0.52 | 0.80 |
| orf19.6404   | GSH2   | 1.72  | 1.22 | 1.59 |
| orf19.6406   |        | 1.27  | 0.67 | 0.99 |
| orf19.6414.3 | TPM2   | 1.53  | 0.89 | 1.32 |
| orf19.6417   | TSR1   | 0.99  | 0.79 | 0.63 |
| orf19.6418   |        | 0.91  | 0.85 | 0.56 |
| orf19.642    |        | 1.86  | 0.68 | 1.02 |
| orf19.6423   |        | 1.76  | 0.73 | 1.73 |
| orf19.6424   |        | 1.34  | 0.73 | 1.21 |
| orf19.6425   |        | 1.02  | 0.64 | 0.81 |
| orf19.6432   |        | 0.90  | 0.89 | 1.11 |
| orf19.6434   |        | 1.79  | 1.10 | 1.11 |
| orf19.6436   |        | 3.68  | 1.24 | 1.89 |
| orf19.6438   |        | 1.20  | 0.58 | 0.82 |
| orf19.6442   | PRP8   | 1.12  | 0.78 | 0.97 |
| orf19.6448   |        | 1.61  | 0.92 | 1.23 |
| orf19.6455   |        | 1.89  | 1.06 | 0.91 |
| orf19.6458.1 |        | 1.10  | 0.47 | 0.84 |
| orf19.6469   |        | 1.39  | 1.74 | 0.89 |
| orf19.6474   |        | 3.50  | 1.36 | 1.90 |
| orf19.6477   |        | 0.89  | 1.41 | 0.55 |
| orf19.6481   | YPS7   | 1.37  | 1.50 | 1.40 |
| orf19.6498   |        | 2.43  | 1.07 | 1.60 |
| orf19.6500   | ECM42  | 1.35  | 1.13 | 2.58 |
| orf19.6507   |        | 1.21  | 1.13 | 1.02 |
| orf19.6512   | EXO70  | 3.04  | 1.24 | 2.80 |
| orf19.6515   | HSP90  | 1.86  | 0.94 | 1.16 |

|              |        |       |      |      |
|--------------|--------|-------|------|------|
| orf19.6524   |        | 1.29  | 0.82 | 1.09 |
| orf19.6529   | CDC34  | 0.89  | 2.28 | 0.92 |
| orf19.6531   | NUC2   | 2.09  | 1.15 | 1.72 |
| orf19.6531.1 | TOM71  | 1.08  | 0.60 | 1.03 |
| orf19.6535   |        | 2.32  | 2.12 | 1.67 |
| orf19.6539   |        | 1.27  | 1.09 | 0.86 |
| orf19.6540   | PFK2   | 0.65  | 1.54 | 0.91 |
| orf19.6541   | RPL5   | 1.00  | 0.94 | 0.89 |
| orf19.6547   |        | 1.38  | 0.85 | 0.98 |
| orf19.6557   |        | 2.06  | 1.24 | 1.73 |
| orf19.6558   |        | 1.15  | 0.73 | 1.04 |
| orf19.6563.1 |        | 1.18  | 0.81 | 1.23 |
| orf19.6565   |        | 0.97  | 0.43 | 0.69 |
| orf19.6568   |        | 1.30  | 0.82 | 1.33 |
| orf19.6573   | BEM2   | 2.05  | 1.40 | 2.03 |
| orf19.6577   | FLU1   | 0.73  | 0.98 | 0.72 |
| orf19.6581   |        | 2.69  | 3.05 | 2.50 |
| orf19.6582   | PRE10  | 1.69  | 1.77 | 1.52 |
| orf19.6584   | PRT1   | 1.32  | 1.09 | 0.96 |
| orf19.6587   |        | 1.19  | 0.74 | 0.89 |
| orf19.6589   |        | 0.83  | 1.39 | 0.71 |
| orf19.6594   | PLB3   | 1.10  | 1.06 | 1.19 |
| orf19.6599.1 |        | 1.30  | 0.82 | 1.12 |
| orf19.6600   |        | 1.47  | 1.62 | 1.06 |
| orf19.6604   |        | 1.38  | 0.97 | 1.06 |
| orf19.661    | KRR1   | 0.64  | 1.10 | 0.55 |
| orf19.6612   |        | 1.06  | 0.64 | 1.18 |
| orf19.6614   | HPR5   | 13.61 | 1.72 | 1.38 |
| orf19.6623   |        | 1.28  | 0.82 | 1.43 |
| orf19.6625   |        | 1.10  | 0.66 | 0.96 |
| orf19.6632   | ACO2   | 1.77  | 1.12 | 1.02 |
| orf19.6640   | TPS1   | 1.06  | 2.16 | 1.23 |
| orf19.6645   | HMO1   | 1.39  | 0.72 | 1.31 |
| orf19.6648   |        | 0.59  | 0.74 | 0.56 |
| orf19.665    | NEP1   | 0.83  | 0.45 | 0.56 |
| orf19.6652   | DBP8   | 0.85  | 0.89 | 0.65 |
| orf19.6656   | DUR3   | 1.44  | 0.94 | 1.24 |
| orf19.6663   | RPS25B | 1.01  | 0.49 | 0.80 |
| orf19.6665   |        | 1.24  | 0.97 | 1.15 |
| orf19.6668   |        | 1.95  | 1.09 | 1.50 |
| orf19.667.1  | RPL37B | 0.92  | 0.62 | 0.85 |
| orf19.6676   |        | 1.36  | 0.80 | 1.29 |
| orf19.668    |        | 3.23  | 2.69 | 1.92 |
| orf19.6682   |        | 1.17  | 0.92 | 1.05 |
| orf19.6686   | ENP2   | 0.54  | 0.98 | 0.45 |
| orf19.6691   |        | 0.57  | 0.87 | 0.53 |
| orf19.6693   |        | 1.60  | 1.01 | 1.64 |
| orf19.6696   |        | 1.71  | 1.36 | 2.33 |
| orf19.6699   |        | 1.96  | 1.02 | 1.16 |
| orf19.670    | SMT3   | 1.00  | 0.78 | 0.94 |
| orf19.6701   |        | 1.55  | 0.87 | 1.11 |
| orf19.6702   | DED81  | 1.59  | 1.08 | 1.22 |
| orf19.6705   |        | 0.85  | 0.59 | 1.18 |
| orf19.671    | PSP1   | 2.72  | 1.02 | 1.41 |
| orf19.6712   |        | 2.52  | 1.28 | 1.35 |
| orf19.6713   |        | 1.74  | 0.94 | 1.28 |
| orf19.6717   |        | 1.32  | 0.86 | 1.02 |
| orf19.6718   |        | 1.01  | 1.34 | 0.92 |
| orf19.672    |        | 2.39  | 1.05 | 2.11 |
| orf19.6726   |        | 1.68  | 1.47 | 1.65 |
| orf19.6729   | TIP120 | 3.31  | 2.56 | 1.57 |
| orf19.6730   |        | 0.77  | 1.05 | 0.80 |
| orf19.6731.1 |        | 1.43  | 0.91 | 1.22 |
| orf19.6734   | TCC1   | 1.30  | 1.10 | 1.39 |
| orf19.6738   | VAN1   | 1.61  | 0.73 | 1.33 |
| orf19.6739   |        | 1.89  | 1.44 | 1.64 |
| orf19.674    |        | 1.05  | 1.39 | 0.59 |

|              |        |      |      |      |
|--------------|--------|------|------|------|
| orf19.6740   |        | 1.06 | 1.35 | 0.80 |
| orf19.6748   |        | 1.11 | 0.79 | 1.09 |
| orf19.6749   | KRS1   | 1.01 | 0.75 | 0.82 |
| orf19.675    |        | 0.65 | 1.28 | 0.67 |
| orf19.6751   |        | 1.07 | 0.97 | 0.90 |
| orf19.6752   |        | 1.25 | 0.86 | 0.95 |
| orf19.6763   | SLK19  | 2.57 | 1.62 | 1.61 |
| orf19.6766   |        | 0.79 | 0.72 | 0.70 |
| orf19.6769   |        | 1.32 | 1.26 | 1.33 |
| orf19.677    | CHO1   | 1.47 | 0.43 | 0.81 |
| orf19.6771   | UBI4   | 1.25 | 1.63 | 1.16 |
| orf19.6773   | ECM29  | 2.33 | 2.55 | 1.69 |
| orf19.6776   | GCD2   | 1.46 | 1.07 | 1.03 |
| orf19.6779   | PRO2   | 2.46 | 1.35 | 1.46 |
| orf19.6780   | MET8   | 1.42 | 0.97 | 1.21 |
| orf19.6782   | BMT1   | 1.56 | 0.91 | 1.96 |
| orf19.6783   |        | 4.21 | 1.45 | 1.72 |
| orf19.6785   | RPS12  | 1.18 | 0.58 | 0.99 |
| orf19.6794   | FESUR1 | 1.91 | 1.03 | 1.59 |
| orf19.6796   |        | 2.40 | 1.59 | 3.90 |
| orf19.6797   |        | 1.58 | 1.31 | 0.89 |
| orf19.680    |        | 1.23 | 0.82 | 0.97 |
| orf19.6803   | HUT1   | 1.53 | 1.21 | 1.41 |
| orf19.6804   |        | 1.43 | 0.99 | 0.92 |
| orf19.6805   |        | 2.17 | 1.66 | 1.81 |
| orf19.6812   | PMT2   | 1.59 | 0.71 | 1.36 |
| orf19.6814   | TDH3   | 0.84 | 0.71 | 0.81 |
| orf19.6816   |        | 0.97 | 1.11 | 0.86 |
| orf19.6818   |        | 1.31 | 1.31 | 0.99 |
| orf19.682    |        | 2.64 | 1.15 | 1.39 |
| orf19.6828.1 |        | 1.43 | 0.74 | 1.54 |
| orf19.6829   |        | 1.16 | 1.04 | 0.95 |
| orf19.6833   |        | 2.18 | 1.68 | 2.51 |
| orf19.6834   |        | 2.01 | 0.60 | 1.15 |
| orf19.6840   |        | 2.62 | 1.57 | 2.00 |
| orf19.6845   |        | 3.74 | 0.88 | 1.41 |
| orf19.6846   | PHO85  | 1.45 | 1.11 | 1.35 |
| orf19.6847   |        | 1.49 | 0.69 | 1.19 |
| orf19.6849   | ELC1   | 2.36 | 1.38 | 1.32 |
| orf19.685    | YHM1   | 1.19 | 0.41 | 0.85 |
| orf19.6853   |        | 1.71 | 0.95 | 0.94 |
| orf19.6854   | ATP1   | 1.81 | 0.78 | 1.07 |
| orf19.6856   |        | 1.80 | 1.18 | 0.88 |
| orf19.6858   |        | 0.95 | 0.46 | 0.85 |
| orf19.686    |        | 1.91 | 1.79 | 1.30 |
| orf19.6860   |        | 1.55 | 1.13 | 1.17 |
| orf19.6862   |        | 0.59 | 1.38 | 0.43 |
| orf19.6865   |        | 0.97 | 0.89 | 0.72 |
| orf19.6868   |        | 2.32 | 1.76 | 2.13 |
| orf19.687.1  | RPL25  | 1.27 | 0.91 | 1.27 |
| orf19.6871   |        | 1.35 | 0.76 | 1.46 |
| orf19.6872   |        | 2.17 | 1.31 | 1.31 |
| orf19.6873   | RPS8A  | 0.99 | 0.59 | 0.76 |
| orf19.6875   | VPS35  | 2.20 | 1.64 | 1.39 |
| orf19.6879   |        | 2.01 | 1.03 | 1.26 |
| orf19.688    |        | 1.44 | 0.90 | 1.21 |
| orf19.6881   | YTH1   | 1.15 | 1.23 | 0.90 |
| orf19.6882   | OSM1   | 0.66 | 1.28 | 0.90 |
| orf19.6882.1 |        | 1.09 | 0.82 | 1.02 |
| orf19.6885   | SPO7   | 1.32 | 0.89 | 1.21 |
| orf19.6886   |        | 0.66 | 0.80 | 0.56 |
| orf19.6889   | MKK2   | 1.93 | 2.20 | 1.60 |
| orf19.6891   | RFC1   | 1.77 | 1.04 | 2.33 |
| orf19.6898.1 |        | 1.49 | 0.94 | 1.63 |
| orf19.6903   |        | 0.87 | 1.22 | 1.01 |
| orf19.6904   | GCN3   | 1.07 | 0.98 | 1.00 |
| orf19.6907   |        | 1.49 | 1.35 | 1.23 |

|              |        |      |      |      |
|--------------|--------|------|------|------|
| orf19.6910   |        | 0.75 | 0.76 | 0.82 |
| orf19.6921   |        | 1.12 | 1.32 | 1.31 |
| orf19.6923   |        | 2.52 | 1.32 | 1.39 |
| orf19.693    |        | 1.72 | 1.07 | 1.65 |
| orf19.6930   | SOL1   | 1.76 | 0.83 | 0.99 |
| orf19.6931   |        | 2.04 | 1.29 | 1.27 |
| orf19.6937   | PTR2   | 0.55 | 1.08 | 0.55 |
| orf19.6938   |        | 1.99 | 1.21 | 1.63 |
| orf19.6939   |        | 1.26 | 1.25 | 1.14 |
| orf19.6951   |        | 1.66 | 1.14 | 2.14 |
| orf19.6955   | HBR3   | 0.80 | 1.00 | 0.62 |
| orf19.696    | STE2   | 1.96 | 1.07 | 1.53 |
| orf19.6967   | USO6   | 1.23 | 2.24 | 1.42 |
| orf19.6972   | SMI1B  | 1.57 | 1.15 | 1.01 |
| orf19.6975   | YST1   | 1.10 | 0.94 | 1.06 |
| orf19.6976   |        | 2.40 | 1.02 | 1.14 |
| orf19.6977   | GPI1   | 1.10 | 1.24 | 1.10 |
| orf19.6988   |        | 2.16 | 0.81 | 1.83 |
| orf19.6992   |        | 0.76 | 2.54 | 0.81 |
| orf19.6993   | GAP2   | 0.72 | 1.68 | 1.00 |
| orf19.6994   | BAT22  | 1.85 | 1.33 | 1.48 |
| orf19.6996   |        | 0.56 | 1.06 | 0.66 |
| orf19.7011   |        | 0.66 | 0.93 | 0.66 |
| orf19.7012   |        | 0.99 | 0.51 | 1.06 |
| orf19.7015   | RPP0   | 1.23 | 0.68 | 1.04 |
| orf19.7017   | YOX1   | 1.73 | 0.86 | 1.63 |
| orf19.7018   | RPS18  | 1.11 | 0.63 | 1.07 |
| orf19.7019   | YML6   | 1.28 | 0.93 | 1.09 |
| orf19.702    |        | 1.00 | 1.54 | 1.08 |
| orf19.7020   |        | 1.11 | 1.10 | 1.08 |
| orf19.7021   | GPH1   | 1.07 | 0.23 | 1.15 |
| orf19.7023   |        | 2.71 | 1.89 | 1.52 |
| orf19.7025   | MCM1   | 1.90 | 0.50 | 1.22 |
| orf19.7034   |        | 1.14 | 1.02 | 0.88 |
| orf19.7036   |        | 1.48 | 1.22 | 1.14 |
| orf19.704    | SOL3   | 1.63 | 1.34 | 1.56 |
| orf19.7041   |        | 1.18 | 1.07 | 0.82 |
| orf19.7043.1 | ACB1   | 1.18 | 0.73 | 1.12 |
| orf19.7044   |        | 2.11 | 1.19 | 1.60 |
| orf19.7046   | MET28  | 1.36 | 1.39 | 1.07 |
| orf19.7047   | RTF1   | 1.87 | 1.05 | 1.72 |
| orf19.7048.1 | RPS28B | 1.04 | 0.73 | 1.07 |
| orf19.7049   | CYB5   | 1.36 | 0.26 | 1.35 |
| orf19.705    | GCN5   | 1.31 | 0.89 | 0.99 |
| orf19.7051   |        | 0.90 | 0.85 | 0.88 |
| orf19.7052   |        | 5.80 | 1.38 | 1.93 |
| orf19.7053   | GAC1   | 1.02 | 0.45 | 0.78 |
| orf19.7057   |        | 0.98 | 0.77 | 0.84 |
| orf19.7062   | RPA135 | 0.87 | 0.66 | 0.64 |
| orf19.7063   |        | 0.93 | 0.53 | 0.84 |
| orf19.7064   | GLN4   | 1.13 | 1.18 | 0.76 |
| orf19.7067   |        | 2.66 | 1.41 | 1.28 |
| orf19.7068   | MAC1   | 1.61 | 1.65 | 2.28 |
| orf19.7069   |        | 0.67 | 0.49 | 0.53 |
| orf19.7072   | PEL1   | 0.95 | 1.02 | 0.85 |
| orf19.7076   |        | 1.19 | 1.00 | 1.04 |
| orf19.7077   |        | 2.53 | 1.02 | 1.86 |
| orf19.7080   | LEU2   | 2.24 | 2.22 | 2.70 |
| orf19.7081   | SPL1   | 1.19 | 1.96 | 0.84 |
| orf19.7082   |        | 1.68 | 1.71 | 1.73 |
| orf19.7088   |        | 0.98 | 1.07 | 1.36 |
| orf19.7089   | PMR1   | 1.10 | 0.62 | 1.06 |
| orf19.7097   |        | 1.66 | 1.08 | 1.22 |
| orf19.710    |        | 2.04 | 0.95 | 1.67 |
| orf19.7101   |        | 1.38 | 0.90 | 1.32 |
| orf19.7104   |        | 0.99 | 0.79 | 1.02 |
| orf19.7107   |        | 0.97 | 0.83 | 0.81 |

|            |        |      |      |      |
|------------|--------|------|------|------|
| orf19.7108 |        | 1.33 | 0.72 | 1.24 |
| orf19.7121 |        | 2.22 | 0.94 | 1.45 |
| orf19.7123 |        | 1.99 | 1.84 | 1.53 |
| orf19.7125 |        | 1.82 | 1.24 | 1.12 |
| orf19.7128 | SYS1   | 2.19 | 1.01 | 1.45 |
| orf19.713  |        | 1.82 | 1.58 | 2.45 |
| orf19.7136 | SPT6   | 1.34 | 0.84 | 0.87 |
| orf19.714  |        | 2.13 | 1.13 | 1.34 |
| orf19.7145 |        | 2.08 | 1.43 | 1.45 |
| orf19.7149 |        | 1.37 | 0.85 | 0.90 |
| orf19.7150 | NRG1   | 1.33 | 1.53 | 1.24 |
| orf19.7152 |        | 1.53 | 0.98 | 1.27 |
| orf19.7153 |        | 1.24 | 1.19 | 1.07 |
| orf19.7154 |        | 0.72 | 0.72 | 0.58 |
| orf19.7160 |        | 0.81 | 1.22 | 0.66 |
| orf19.7166 |        | 0.55 | 1.85 | 0.53 |
| orf19.7170 |        | 1.14 | 0.60 | 0.98 |
| orf19.7175 | HLJ1   | 2.63 | 1.37 | 1.97 |
| orf19.7176 | NPT1   | 1.31 | 1.18 | 1.88 |
| orf19.7177 | KAP120 | 1.00 | 1.03 | 0.88 |
| orf19.7178 | PRE5   | 2.31 | 2.62 | 1.71 |
| orf19.7179 |        | 2.90 | 2.02 | 1.53 |
| orf19.7184 |        | 2.97 | 1.16 | 1.88 |
| orf19.7185 |        | 1.81 | 1.00 | 1.07 |
| orf19.7187 | MAM33  | 0.99 | 0.70 | 0.94 |
| orf19.719  |        | 1.31 | 1.65 | 1.53 |
| orf19.7193 |        | 1.69 | 0.85 | 1.05 |
| orf19.7195 | RAD6   | 1.82 | 1.06 | 1.36 |
| orf19.7197 |        | 0.70 | 1.06 | 0.41 |
| orf19.7198 |        | 1.37 | 1.54 | 0.99 |
| orf19.7199 |        | 1.66 | 1.03 | 1.29 |
| orf19.7200 |        | 4.08 | 1.54 | 1.81 |
| orf19.7202 |        | 1.67 | 0.80 | 1.23 |
| orf19.7203 |        | 1.40 | 1.14 | 1.34 |
| orf19.7216 |        | 2.13 | 1.11 | 1.79 |
| orf19.7217 | RPL4B  | 1.08 | 0.68 | 1.04 |
| orf19.7219 | FTR1   | 1.04 | 0.49 | 1.06 |
| orf19.7228 |        | 2.79 | 1.48 | 3.48 |
| orf19.7233 |        | 3.54 | 0.89 | 1.84 |
| orf19.7236 | TIF35  | 1.28 | 1.00 | 1.03 |
| orf19.7238 | NPL3   | 1.09 | 0.75 | 0.76 |
| orf19.7242 | NCR1   | 3.50 | 1.25 | 2.02 |
| orf19.7243 |        | 2.50 | 0.88 | 1.54 |
| orf19.7244 |        | 2.01 | 2.30 | 1.50 |
| orf19.7250 |        | 2.74 | 2.86 | 2.15 |
| orf19.7252 |        | 2.31 | 1.69 | 2.57 |
| orf19.7255 | RPC10  | 0.87 | 0.72 | 0.75 |
| orf19.7256 |        | 1.72 | 0.94 | 1.47 |
| orf19.7260 |        | 2.39 | 1.60 | 2.04 |
| orf19.7264 |        | 1.48 | 1.11 | 1.09 |
| orf19.7266 |        | 1.78 | 1.46 | 1.50 |
| orf19.7269 |        | 1.46 | 0.82 | 1.10 |
| orf19.7270 |        | 1.25 | 1.51 | 1.10 |
| orf19.7272 |        | 3.29 | 1.60 | 1.66 |
| orf19.7278 |        | 1.84 | 2.13 | 1.28 |
| orf19.7297 |        | 1.57 | 1.29 | 1.02 |
| orf19.7298 | CHS2   | 0.90 | 0.66 | 1.55 |
| orf19.73   |        | 3.06 | 1.20 | 1.84 |
| orf19.7308 | TUB1   | 1.36 | 0.49 | 0.89 |
| orf19.731  | EMP46  | 1.57 | 1.74 | 1.42 |
| orf19.7312 | ERG13  | 1.33 | 0.72 | 0.91 |
| orf19.7322 |        | 1.18 | 1.20 | 1.12 |
| orf19.7325 |        | 0.85 | 0.56 | 0.57 |
| orf19.7326 |        | 1.56 | 2.16 | 0.89 |
| orf19.7327 | PHO88  | 1.60 | 0.59 | 4.01 |
| orf19.7329 |        | 1.42 | 0.96 | 0.94 |
| orf19.7332 | ELF1   | 0.51 | 1.25 | 0.43 |

|              |        |      |      |      |
|--------------|--------|------|------|------|
| orf19.7335   | PRE8   | 1.42 | 0.93 | 1.01 |
| orf19.7346   |        | 1.03 | 0.73 | 1.25 |
| orf19.7349   | CHS4   | 1.30 | 1.85 | 1.09 |
| orf19.735    |        | 1.74 | 1.08 | 1.28 |
| orf19.7354   |        | 1.17 | 0.42 | 0.93 |
| orf19.7358   |        | 1.19 | 1.49 | 1.16 |
| orf19.7363   | KRE6   | 1.60 | 0.65 | 1.02 |
| orf19.7366   |        | 1.20 | 0.95 | 1.02 |
| orf19.7367   | UBP1   | 1.06 | 1.20 | 0.89 |
| orf19.7368   |        | 1.42 | 0.66 | 1.24 |
| orf19.7378   |        | 2.20 | 1.38 | 1.37 |
| orf19.738    | MYO5   | 2.25 | 2.67 | 2.03 |
| orf19.7383   | MNN9   | 2.24 | 0.71 | 1.55 |
| orf19.7384   | NOG1   | 0.75 | 0.93 | 0.65 |
| orf19.7386   |        | 1.10 | 1.25 | 1.43 |
| orf19.7387   |        | 1.05 | 0.96 | 0.87 |
| orf19.7388   | PBS2   | 1.97 | 0.85 | 1.64 |
| orf19.7391   | OCH1   | 1.50 | 0.77 | 1.12 |
| orf19.7392   |        | 1.45 | 0.89 | 0.99 |
| orf19.7394   | GDA1   | 1.46 | 0.99 | 1.45 |
| orf19.740    | HAP41  | 1.43 | 0.57 | 0.92 |
| orf19.7404   |        | 1.10 | 1.47 | 1.22 |
| orf19.7409   | ERV25  | 1.53 | 0.65 | 1.37 |
| orf19.7420   |        | 2.06 | 2.81 | 1.35 |
| orf19.7421   | CYP5   | 1.59 | 0.95 | 1.45 |
| orf19.7422   |        | 0.68 | 0.80 | 0.51 |
| orf19.7427   |        | 1.00 | 0.63 | 1.05 |
| orf19.7433   |        | 1.07 | 1.00 | 0.87 |
| orf19.7436   | AAF1   | 1.12 | 1.55 | 1.00 |
| orf19.7437   |        | 1.99 | 2.42 | 1.46 |
| orf19.744    | GDB1   | 1.25 | 1.28 | 1.13 |
| orf19.7442   |        | 1.74 | 1.17 | 1.89 |
| orf19.7447   | JEN1   | 1.39 | 1.00 | 1.16 |
| orf19.7448   | LYS9   | 1.56 | 0.83 | 1.01 |
| orf19.7450   |        | 2.63 | 2.35 | 1.61 |
| orf19.7454   | TAF60  | 1.84 | 1.01 | 1.49 |
| orf19.7466   | ACC1   | 0.65 | 0.53 | 0.56 |
| orf19.7475   | PHO81  | 1.15 | 1.31 | 1.68 |
| orf19.7477   | YRB1   | 1.17 | 1.01 | 1.09 |
| orf19.7479   | NTH1   | 1.70 | 2.16 | 0.93 |
| orf19.748    |        | 1.06 | 0.87 | 0.95 |
| orf19.7483   | CRM1   | 1.67 | 1.24 | 1.33 |
| orf19.7484   | ADE1   | 1.28 | 0.60 | 1.00 |
| orf19.7485   |        | 1.04 | 0.73 | 0.93 |
| orf19.7486   | MRPL6  | 1.76 | 1.67 | 1.51 |
| orf19.7488   |        | 0.87 | 1.07 | 0.82 |
| orf19.7489   |        | 0.98 | 0.58 | 1.20 |
| orf19.7489.3 |        | 1.05 | 0.63 | 1.07 |
| orf19.7509.1 | ATP17  | 1.35 | 0.89 | 1.51 |
| orf19.7509.2 | LSM6   | 1.19 | 0.75 | 1.08 |
| orf19.7511   |        | 1.21 | 0.75 | 1.08 |
| orf19.7520   | POT1   | 2.72 | 0.74 | 1.16 |
| orf19.7523   | MKC1   | 1.71 | 1.08 | 1.34 |
| orf19.753    |        | 2.78 | 1.13 | 2.66 |
| orf19.7534   |        | 0.72 | 0.62 | 0.49 |
| orf19.7538   |        | 1.99 | 0.96 | 1.40 |
| orf19.754    |        | 0.98 | 0.74 | 0.78 |
| orf19.7549   | PMT5   | 1.91 | 1.22 | 1.56 |
| orf19.755    | MRPL37 | 1.33 | 0.88 | 1.21 |
| orf19.7551   | ALO1   | 1.31 | 1.29 | 0.99 |
| orf19.7552   |        | 0.96 | 1.51 | 0.57 |
| orf19.7563   | BET2   | 2.29 | 1.38 | 1.92 |
| orf19.7566   |        | 1.35 | 0.44 | 0.84 |
| orf19.7569   |        | 0.90 | 0.63 | 0.62 |
| orf19.7571   | UBC4   | 1.84 | 1.44 | 1.62 |
| orf19.7572   | SPT7   | 1.96 | 1.15 | 1.37 |
| orf19.7577   | MSS51  | 1.27 | 0.97 | 1.16 |

|             |       |      |      |      |
|-------------|-------|------|------|------|
| orf19.7579  | FGR34 | 2.44 | 1.25 | 1.39 |
| orf19.7580  |       | 0.92 | 0.85 | 0.96 |
| orf19.7581  |       | 1.54 | 1.10 | 0.91 |
| orf19.7586  | CHT3  | 0.61 | 0.40 | 0.69 |
| orf19.7590  |       | 2.12 | 0.89 | 1.35 |
| orf19.7591  |       | 2.02 | 1.20 | 1.37 |
| orf19.7592  | FAA4  | 0.92 | 0.74 | 0.60 |
| orf19.7593  |       | 1.17 | 1.23 | 1.02 |
| orf19.7596  |       | 3.89 | 1.86 | 2.94 |
| orf19.7599  |       | 0.75 | 0.95 | 0.63 |
| orf19.76    | SPB1  | 0.61 | 1.09 | 0.49 |
| orf19.760   |       | 1.68 | 1.40 | 1.42 |
| orf19.7602  |       | 1.80 | 1.50 | 1.29 |
| orf19.7604  |       | 2.37 | 1.74 | 1.78 |
| orf19.7613  | HCR1  | 1.25 | 1.15 | 1.02 |
| orf19.7615  |       | 2.90 | 1.54 | 1.79 |
| orf19.7617  |       | 1.40 | 1.11 | 1.14 |
| orf19.7618  |       | 0.87 | 0.70 | 0.57 |
| orf19.7624  |       | 1.43 | 1.50 | 1.02 |
| orf19.7626  | EIF4E | 1.32 | 0.89 | 1.28 |
| orf19.763   |       | 1.28 | 1.43 | 1.07 |
| orf19.7631  |       | 3.80 | 1.17 | 2.31 |
| orf19.7638  | PRO1  | 1.20 | 1.55 | 1.81 |
| orf19.7643  |       | 1.66 | 1.12 | 1.44 |
| orf19.7648  |       | 5.89 | 1.37 | 2.39 |
| orf19.7650  | LTV1  | 0.69 | 0.79 | 0.69 |
| orf19.7652  | CKA1  | 1.86 | 1.82 | 1.25 |
| orf19.7655  | RPO21 | 1.39 | 0.74 | 1.10 |
| orf19.7658  | RFC4  | 2.06 | 1.56 | 1.50 |
| orf19.7661  | HMI1  | 2.00 | 1.14 | 1.98 |
| orf19.7662  |       | 1.85 | 1.33 | 1.18 |
| orf19.7663  |       | 1.64 | 1.58 | 1.51 |
| orf19.7664  |       | 1.13 | 1.08 | 1.32 |
| orf19.7668  | MAL2  | 4.09 | 0.84 | 1.79 |
| orf19.7670  |       | 1.55 | 0.66 | 0.92 |
| orf19.7672  |       | 2.07 | 0.93 | 1.77 |
| orf19.7673  |       | 1.22 | 0.77 | 1.29 |
| orf19.7675  |       | 1.22 | 0.65 | 0.97 |
| orf19.7676  | XYL2  | 0.88 | 0.88 | 0.83 |
| orf19.7678  |       | 1.80 | 1.05 | 1.76 |
| orf19.772   | LYS21 | 1.36 | 0.84 | 1.03 |
| orf19.773   |       | 1.13 | 0.70 | 0.55 |
| orf19.775   |       | 2.23 | 1.58 | 1.74 |
| orf19.776   |       | 2.82 | 1.75 | 1.34 |
| orf19.778   | PIL1  | 1.55 | 0.80 | 0.95 |
| orf19.779   |       | 2.14 | 0.97 | 1.26 |
| orf19.785   |       | 1.44 | 0.77 | 1.40 |
| orf19.789   | PYC2  | 1.41 | 0.67 | 0.86 |
| orf19.791   | RIM11 | 2.18 | 1.39 | 2.24 |
| orf19.793   | CAK1  | 1.06 | 0.52 | 0.76 |
| orf19.797   | BAT21 | 1.15 | 1.90 | 0.97 |
| orf19.798   | TAF14 | 1.44 | 1.17 | 1.28 |
| orf19.801   | TBF1  | 1.01 | 0.59 | 0.78 |
| orf19.807   | CHS5  | 2.45 | 4.09 | 1.88 |
| orf19.809   |       | 0.56 | 0.89 | 0.48 |
| orf19.813   |       | 0.67 | 0.59 | 0.32 |
| orf19.814   | SSY1  | 2.08 | 2.92 | 2.08 |
| orf19.815   | DCK1  | 1.95 | 1.12 | 1.35 |
| orf19.819   |       | 1.54 | 1.03 | 1.57 |
| orf19.820   | SDS22 | 1.59 | 2.77 | 1.50 |
| orf19.825   | GCD7  | 1.12 | 1.33 | 0.97 |
| orf19.827.1 | RPL39 | 1.16 | 0.72 | 1.03 |
| orf19.828   |       | 1.35 | 0.69 | 1.07 |
| orf19.829   | SCH9  | 0.92 | 0.80 | 0.87 |
| orf19.83    |       | 1.10 | 1.18 | 1.43 |
| orf19.832   | GPI13 | 1.20 | 0.86 | 1.12 |
| orf19.838.1 | RPS9B | 1.12 | 0.68 | 1.07 |

|             |        |      |       |      |
|-------------|--------|------|-------|------|
| orf19.839   |        | 0.85 | 0.64  | 0.76 |
| orf19.840   | RPL21A | 1.11 | 0.77  | 1.07 |
| orf19.842   | ASR3   | 1.71 | 0.69  | 1.03 |
| orf19.863   |        | 1.17 | 0.84  | 0.86 |
| orf19.873.1 | COX6   | 1.25 | 0.77  | 1.07 |
| orf19.876   | PGA33  | 2.19 | 0.76  | 1.51 |
| orf19.879   |        | 1.96 | 1.14  | 1.32 |
| orf19.880   |        | 1.08 | 1.06  | 0.90 |
| orf19.882   | HSP78  | 2.84 | 10.70 | 3.74 |
| orf19.886   | PAN1   | 1.93 | 1.59  | 1.68 |
| orf19.889   | THI20  | 1.76 | 2.61  | 2.32 |
| orf19.891   |        | 1.45 | 1.14  | 0.82 |
| orf19.895   | HOG1   | 1.73 | 1.57  | 1.42 |
| orf19.898   | HEM2   | 1.38 | 1.04  | 1.32 |
| orf19.90    |        | 2.35 | 1.81  | 1.91 |
| orf19.900   |        | 1.38 | 1.01  | 0.97 |
| orf19.906   | ROM2   | 1.36 | 1.29  | 1.07 |
| orf19.907   |        | 2.05 | 0.63  | 1.77 |
| orf19.908   | FEN12  | 1.31 | 0.90  | 1.28 |
| orf19.912   |        | 1.35 | 1.03  | 0.85 |
| orf19.913.2 |        | 1.40 | 0.92  | 1.42 |
| orf19.915   |        | 1.59 | 2.67  | 1.28 |
| orf19.917   |        | 1.90 | 1.38  | 1.29 |
| orf19.918   | CDR11  | 2.27 | 0.97  | 1.46 |
| orf19.919   |        | 3.26 | 1.28  | 2.25 |
| orf19.92    |        | 2.13 | 1.16  | 1.48 |
| orf19.920   | RMT2   | 1.03 | 0.98  | 0.80 |
| orf19.922   | ERG11  | 0.82 | 0.53  | 0.91 |
| orf19.923   | THR1   | 1.37 | 1.14  | 1.45 |
| orf19.924   |        | 1.59 | 1.31  | 1.45 |
| orf19.926   |        | 2.17 | 1.31  | 1.31 |
| orf19.927   |        | 1.83 | 0.99  | 1.54 |
| orf19.93    |        | 2.05 | 0.88  | 1.39 |
| orf19.930   | PET9   | 1.78 | 0.64  | 1.33 |
| orf19.939   | NAM7   | 0.88 | 1.20  | 1.03 |
| orf19.941   | SEC14  | 1.21 | 0.87  | 1.13 |
| orf19.943   | FET33  | 1.94 | 0.72  | 1.30 |
| orf19.946   | MET14  | 1.17 | 1.15  | 1.13 |
| orf19.947   | MRP17  | 1.31 | 1.42  | 1.23 |
| orf19.952   |        | 7.94 | 0.97  | 1.85 |
| orf19.953.1 | COF1   | 1.41 | 0.85  | 1.12 |
| orf19.955   |        | 1.80 | 1.01  | 1.41 |
| orf19.96    | TOP1   | 0.76 | 0.59  | 0.65 |
| orf19.961.2 |        | 1.27 | 0.92  | 1.05 |
| orf19.962   |        | 0.82 | 0.75  | 0.64 |
| orf19.964   |        | 2.14 | 1.00  | 0.97 |
| orf19.967   |        | 1.59 | 0.85  | 0.97 |
| orf19.968   | PGA14  | 1.45 | 0.82  | 1.17 |
| orf19.969   |        | 1.05 | 0.61  | 0.74 |
| orf19.976   | BRE1   | 1.50 | 1.17  | 1.19 |
| orf19.978   | BDF1   | 0.81 | 0.92  | 0.72 |
| orf19.980   |        | 1.07 | 0.94  | 1.10 |
| orf19.989   |        | 1.38 | 0.83  | 0.91 |
| orf19.992   | LKH1   | 1.50 | 1.37  | 1.38 |
| orf19.993   |        | 2.48 | 2.03  | 1.60 |
| orf19.998   |        | 1.93 | 1.40  | 1.28 |
