# Supplementary material for: Mechanisms Underlying the Exquisite Sensitivity of Candida albicans to Combinatorial Cationic and Oxidative Stress That Enhances the Potent Fungicidal Activity of Phagocytes
Source: PubMed Central journal article supplement (PMC4161263; doi:10.1128/mbio.01334-14), 2014-07-15
Supplement: mbo004141905st3.pdf [file mbo004141905st3.pdf]

**Table S3. qRT-PCR primers and probes used**

| <b>Gene</b>  | <b>Probe</b> | <b>Forward Primer</b> | <b>Reverse Primer</b>   |
|--------------|--------------|-----------------------|-------------------------|
| <i>ACT1</i>  | 9            | aaccaccggtattgtttgg   | gcgtaaattggaacaacgtg    |
| <i>HGT10</i> | 22           | accaatttcgccgttggtat  | acaacccaaccactagcag     |
| <i>TRR1</i>  | 77           | ttcagaaacaaccattagctg | aatggcttcttcacaagctg    |
| <i>CAT1</i>  | 78           | tggtttattctccgacagagg | tgaccagagtaaccattcattct |
